# Supplementary material for: Sensitivity and Specificity of a Urine Circulating Anodic Antigen Test for the Diagnosis of Schistosoma haematobium in Low Endemic Settings
Source: PubMed Central journal article supplement (PMC4431728; doi:10.1371/journal.pntd.0003752), 2015-05-14
Supplement: pntd.0003752.s002.pdf [file pntd.0003752.s002.pdf]

| Isl   | Year | District    | Date      | School | ID    | Sex | Age | Standard1 |
|-------|------|-------------|-----------|--------|-------|-----|-----|-----------|
| Pemba | 2013 | Chake Chake | 16/4/2013 | KWALE  | 02001 | F   | 10  | 4         |
| Pemba | 2013 | Chake Chake | 16/4/2013 | KWALE  | 02002 | F   | 10  | 4         |
| Pemba | 2013 | Chake Chake | 16/4/2013 | KWALE  | 02003 | F   | 10  | 4         |
| Pemba | 2013 | Chake Chake | 16/4/2013 | KWALE  | 02004 | F   | 10  | 4         |
| Pemba | 2013 | Chake Chake | 16/4/2013 | KWALE  | 02005 | F   | 10  | 4         |
| Pemba | 2013 | Chake Chake | 16/4/2013 | KWALE  | 02006 | F   | 11  | 4         |
| Pemba | 2013 | Chake Chake | 16/4/2013 | KWALE  | 02007 | F   | 11  | 4         |
| Pemba | 2013 | Chake Chake | 16/4/2013 | KWALE  | 02008 | F   | 11  | 4         |
| Pemba | 2013 | Chake Chake | 16/4/2013 | KWALE  | 02009 | F   | 11  | 4         |
| Pemba | 2013 | Chake Chake | 16/4/2013 | KWALE  | 02010 | F   | 11  | 4         |
| Pemba | 2013 | Chake Chake | 16/4/2013 | KWALE  | 02011 | F   | 12  | 4         |
| Pemba | 2013 | Chake Chake | 16/4/2013 | KWALE  | 02012 | F   | 12  | 4         |
| Pemba | 2013 | Chake Chake | 16/4/2013 | KWALE  | 02013 | F   | 11  | 4         |
| Pemba | 2013 | Chake Chake | 16/4/2013 | KWALE  | 02014 | F   | 10  | 4         |
| Pemba | 2013 | Chake Chake | 16/4/2013 | KWALE  | 02015 | F   | 12  | 4         |
| Pemba | 2013 | Chake Chake | 16/4/2013 | KWALE  | 02016 | F   | 10  | 4         |
| Pemba | 2013 | Chake Chake | 16/4/2013 | KWALE  | 02017 | F   | 11  | 4         |
| Pemba | 2013 | Chake Chake | 16/4/2013 | KWALE  | 02018 | F   | 10  | 4         |
| Pemba | 2013 | Chake Chake | 16/4/2013 | KWALE  | 02019 | F   | 10  | 4         |
| Pemba | 2013 | Chake Chake | 16/4/2013 | KWALE  | 02020 | F   | 10  | 4         |
| Pemba | 2013 | Chake Chake | 16/4/2013 | KWALE  | 02021 | F   | 11  | 4         |
| Pemba | 2013 | Chake Chake | 16/4/2013 | KWALE  | 02022 | F   | 12  | 4         |
| Pemba | 2013 | Chake Chake | 16/4/2013 | KWALE  | 02023 | F   | 11  | 4         |
| Pemba | 2013 | Chake Chake | 16/4/2013 | KWALE  | 02024 | F   | 12  | 4         |
| Pemba | 2013 | Chake Chake | 16/4/2013 | KWALE  | 02025 | F   | 11  | 4         |
| Pemba | 2013 | Chake Chake | 16/4/2013 | KWALE  | 02026 | F   | 10  | 4         |
| Pemba | 2013 | Chake Chake | 16/4/2013 | KWALE  | 02027 | F   | 11  | 4         |
| Pemba | 2013 | Chake Chake | 16/4/2013 | KWALE  | 02028 | F   | 10  | 4         |
| Pemba | 2013 | Chake Chake | 16/4/2013 | KWALE  | 02029 | F   | 12  | 4         |
| Pemba | 2013 | Chake Chake | 16/4/2013 | KWALE  | 02030 | F   | 11  | 4         |
| Pemba | 2013 | Chake Chake | 16/4/2013 | KWALE  | 02031 | F   | 11  | 4         |
| Pemba | 2013 | Chake Chake | 16/4/2013 | KWALE  | 02032 | F   | 12  | 4         |
| Pemba | 2013 | Chake Chake | 16/4/2013 | KWALE  | 02033 | F   | 11  | 4         |
| Pemba | 2013 | Chake Chake | 16/4/2013 | KWALE  | 02034 | M   | 12  | 4         |
| Pemba | 2013 | Chake Chake | 16/4/2013 | KWALE  | 02035 | M   | 12  | 4         |
| Pemba | 2013 | Chake Chake | 16/4/2013 | KWALE  | 02036 | M   | 10  | 4         |
| Pemba | 2013 | Chake Chake | 16/4/2013 | KWALE  | 02037 | M   | 10  | 4         |
| Pemba | 2013 | Chake Chake | 16/4/2013 | KWALE  | 02038 | M   | 11  | 4         |
| Pemba | 2013 | Chake Chake | 16/4/2013 | KWALE  | 02039 | M   | 11  | 4         |
| Pemba | 2013 | Chake Chake | 16/4/2013 | KWALE  | 02040 | M   | 11  | 4         |
| Pemba | 2013 | Chake Chake | 16/4/2013 | KWALE  | 02041 | M   | 12  | 4         |
| Pemba | 2013 | Chake Chake | 16/4/2013 | KWALE  | 02042 | M   | 12  | 4         |
| Pemba | 2013 | Chake Chake | 16/4/2013 | KWALE  | 02043 | M   | 11  | 4         |
| Pemba | 2013 | Chake Chake | 16/4/2013 | KWALE  | 02044 | M   | 11  | 4         |
| Pemba | 2013 | Chake Chake | 16/4/2013 | KWALE  | 02045 | M   | 12  | 4         |
| Pemba | 2013 | Chake Chake | 16/4/2013 | KWALE  | 02046 | M   | 11  | 4         |
| Pemba | 2013 | Chake Chake | 16/4/2013 | KWALE  | 02047 | M   | 12  | 4         |
| Pemba | 2013 | Chake Chake | 16/4/2013 | KWALE  | 02048 | M   | 12  | 4         |
| Pemba | 2013 | Chake Chake | 16/4/2013 | KWALE  | 02049 | M   | 11  | 4         |



|       |      |             |            |       |       |   |    |   |
|-------|------|-------------|------------|-------|-------|---|----|---|
| Pemba | 2013 | Chake Chake | 16/4/2013  | KWALE | 02100 | M | 10 | 3 |
| Pemba | 2013 | Chake Chake | 16/4/2013  | KWALE | 02101 | M | 12 | 3 |
| Pemba | 2013 | Chake Chake | 16/4/2013  | KWALE | 02102 | M | 11 | 3 |
| Pemba | 2013 | Chake Chake | 16/4/2013  | KWALE | 02103 | M | 11 | 3 |
| Pemba | 2013 | Chake Chake | 16/4/2013  | KWALE | 02104 | M | 10 | 3 |
| Pemba | 2013 | Chake Chake | 16/4/2013  | KWALE | 02105 | M | 12 | 3 |
| Pemba | 2013 | Chake Chake | 16/4/2013  | KWALE | 02106 | M | 12 | 3 |
| Pemba | 2013 | Chake Chake | 16/4/2013  | KWALE | 02107 | M | 11 | 3 |
| Pemba | 2013 | Chake Chake | 16/4/2013  | KWALE | 02108 | M | 10 | 3 |
| Pemba | 2013 | Chake Chake | 16/4/2013  | KWALE | 02109 | M | 11 | 3 |
| Pemba | 2013 | Chake Chake | 16/4/2013  | KWALE | 02110 | M | 10 | 3 |
| Pemba | 2013 | Chake Chake | 16/4/2013  | KWALE | 02111 | M | 11 | 3 |
| Pemba | 2013 | Chake Chake | 16/4/2013  | KWALE | 02112 | M | 11 | 3 |
| Pemba | 2013 | Chake Chake | 16/4/2013  | KWALE | 02113 | M | 11 | 3 |
| Pemba | 2013 | Chake Chake | 16/4/2013  | KWALE | 02114 | M | 10 | 3 |
| Pemba | 2013 | Chake Chake | 16/4/2013  | KWALE | 02115 | M | 11 | 3 |
| Pemba | 2013 | Chake Chake | 16/4/2013  | KWALE | 02116 | M | 10 | 3 |
| Pemba | 2013 | Chake Chake | 16/4/2013  | KWALE | 02117 | M | 10 | 3 |
| Pemba | 2013 | Chake Chake | 16/4/2013  | KWALE | 02118 | M | 10 | 3 |
| Pemba | 2013 | Chake Chake | 16/4/2013  | KWALE | 02119 | M | 10 | 3 |
| Pemba | 2013 | Chake Chake | 16/4/2013  | KWALE | 02120 | M | 11 | 3 |
| Pemba | 2013 | Chake Chake | 16/4/2013  | KWALE | 02121 | M | 10 | 3 |
| Pemba | 2013 | Chake Chake | 16/4/2013  | KWALE | 02122 | M | 11 | 3 |
| Pemba | 2013 | Chake Chake | 16/4/2013  | KWALE | 02123 | M | 11 | 3 |
| Pemba | 2013 | Chake Chake | 16/4/2013  | KWALE | 02124 | M | 11 | 3 |
| Pemba | 2013 | Chake Chake | 16/4/2013  | KWALE | 02125 | M | 10 | 3 |
| Pemba | 2013 | Chake Chake | 16/4/2013  | KWALE | 02126 | M | 11 | 3 |
| Pemba | 2013 | Chake Chake | 16/4/2013  | KWALE | 02127 | M | 10 | 3 |
| Pemba | 2013 | Chake Chake | 16/4/2013  | KWALE | 02128 | M | 10 | 3 |
| Pemba | 2013 | Chake Chake | 16/4/2013  | KWALE | 02129 | M | 11 | 3 |
| Pemba | 2013 | Chake Chake | 16/4/2013  | KWALE | 02130 | M | 11 | 3 |
| Pemba | 2013 | Chake Chake | 03.01.2013 | WESHA | 04001 | F | 11 | 4 |
| Pemba | 2013 | Chake Chake | 03.01.2013 | WESHA | 04002 | F | 12 | 4 |
| Pemba | 2013 | Chake Chake | 03.01.2013 | WESHA | 04003 | F | 10 | 4 |
| Pemba | 2013 | Chake Chake | 03.01.2013 | WESHA | 04004 | F | 10 | 4 |
| Pemba | 2013 | Chake Chake | 03.01.2013 | WESHA | 04005 | F | 13 | 4 |
| Pemba | 2013 | Chake Chake | 03.01.2013 | WESHA | 04006 | F | 11 | 4 |
| Pemba | 2013 | Chake Chake | 03.01.2013 | WESHA | 04007 | F | 12 | 4 |
| Pemba | 2013 | Chake Chake | 03.01.2013 | WESHA | 04008 | F | 13 | 4 |
| Pemba | 2013 | Chake Chake | 03.01.2013 | WESHA | 04009 | F | 11 | 4 |
| Pemba | 2013 | Chake Chake | 03.01.2013 | WESHA | 04010 | F | 10 | 4 |
| Pemba | 2013 | Chake Chake | 03.01.2013 | WESHA | 04011 | F | 11 | 4 |
| Pemba | 2013 | Chake Chake | 03.01.2013 | WESHA | 04012 | F | 11 | 4 |
| Pemba | 2013 | Chake Chake | 03.01.2013 | WESHA | 04013 | F | 12 | 4 |
| Pemba | 2013 | Chake Chake | 03.01.2013 | WESHA | 04014 | F | 10 | 4 |
| Pemba | 2013 | Chake Chake | 03.01.2013 | WESHA | 04015 | F | 12 | 4 |
| Pemba | 2013 | Chake Chake | 03.01.2013 | WESHA | 04016 | F | 12 | 4 |
| Pemba | 2013 | Chake Chake | 03.01.2013 | WESHA | 04017 | F | 10 | 4 |
| Pemba | 2013 | Chake Chake | 03.01.2013 | WESHA | 04018 | F | 11 | 4 |
| Pemba | 2013 | Chake Chake | 03.01.2013 | WESHA | 04019 | F | 9  | 4 |





|       |      |             |            |       |       |   |    |   |
|-------|------|-------------|------------|-------|-------|---|----|---|
| Pemba | 2013 | Chake Chake | 03.01.2013 | WESHA | 04120 | M | 10 | 3 |
| Pemba | 2013 | Chake Chake | 03.01.2013 | WESHA | 04121 | M | 10 | 3 |
| Pemba | 2013 | Chake Chake | 03.01.2013 | WESHA | 04122 | M | 10 | 3 |
| Pemba | 2013 | Chake Chake | 03.01.2013 | WESHA | 04123 | M | 10 | 3 |
| Pemba | 2013 | Chake Chake | 03.01.2013 | WESHA | 04124 | F | 10 | 3 |
| Pemba | 2013 | Chake Chake | 03.01.2013 | WESHA | 04125 | F | 10 | 3 |
| Pemba | 2013 | Chake Chake | 03.01.2013 | WESHA | 04126 | F | 9  | 3 |
| Pemba | 2013 | Chake Chake | 03.01.2013 | WESHA | 04127 | F | 9  | 3 |
| Pemba | 2013 | Chake Chake | 03.01.2013 | WESHA | 04128 | F | 10 | 3 |
| Pemba | 2013 | Chake Chake | 03.01.2013 | WESHA | 04129 | F | 11 | 3 |
| Pemba | 2013 | Chake Chake | 03.01.2013 | WESHA | 04130 | F | 11 | 3 |
| Pemba | 2013 | Chake Chake | 03.01.2013 | WESHA | 04257 | M | 12 | 4 |
| Pemba | 2013 | Chake Chake | 19/4/2013  | WAWI  | 06001 | F | 10 | 4 |
| Pemba | 2013 | Chake Chake | 19/4/2013  | WAWI  | 06002 | F | 9  | 4 |
| Pemba | 2013 | Chake Chake | 19/4/2013  | WAWI  | 06003 | F | 11 | 4 |
| Pemba | 2013 | Chake Chake | 19/4/2013  | WAWI  | 06004 | F | 11 | 4 |
| Pemba | 2013 | Chake Chake | 19/4/2013  | WAWI  | 06005 | F | 11 | 4 |
| Pemba | 2013 | Chake Chake | 19/4/2013  | WAWI  | 06006 | F | 10 | 4 |
| Pemba | 2013 | Chake Chake | 19/4/2013  | WAWI  | 06007 | F | 11 | 4 |
| Pemba | 2013 | Chake Chake | 19/4/2013  | WAWI  | 06008 | F | 11 | 4 |
| Pemba | 2013 | Chake Chake | 19/4/2013  | WAWI  | 06009 | F | 10 | 4 |
| Pemba | 2013 | Chake Chake | 19/4/2013  | WAWI  | 06010 | F | 11 | 4 |
| Pemba | 2013 | Chake Chake | 19/4/2013  | WAWI  | 06011 | F | 11 | 4 |
| Pemba | 2013 | Chake Chake | 19/4/2013  | WAWI  | 06012 | F | 10 | 4 |
| Pemba | 2013 | Chake Chake | 19/4/2013  | WAWI  | 06013 | F | 9  | 4 |
| Pemba | 2013 | Chake Chake | 19/4/2013  | WAWI  | 06014 | F | 9  | 4 |
| Pemba | 2013 | Chake Chake | 19/4/2013  | WAWI  | 06015 | F | 11 | 4 |
| Pemba | 2013 | Chake Chake | 19/4/2013  | WAWI  | 06016 | F | 11 | 4 |
| Pemba | 2013 | Chake Chake | 19/4/2013  | WAWI  | 06017 | F | 11 | 4 |
| Pemba | 2013 | Chake Chake | 19/4/2013  | WAWI  | 06018 | F | 10 | 4 |
| Pemba | 2013 | Chake Chake | 19/4/2013  | WAWI  | 06019 | F | 10 | 4 |
| Pemba | 2013 | Chake Chake | 19/4/2013  | WAWI  | 06020 | F | 11 | 4 |
| Pemba | 2013 | Chake Chake | 19/4/2013  | WAWI  | 06021 | F | 10 | 4 |
| Pemba | 2013 | Chake Chake | 19/4/2013  | WAWI  | 06022 | F | 9  | 4 |
| Pemba | 2013 | Chake Chake | 19/4/2013  | WAWI  | 06023 | F | 11 | 4 |
| Pemba | 2013 | Chake Chake | 19/4/2013  | WAWI  | 06024 | F | 11 | 4 |
| Pemba | 2013 | Chake Chake | 19/4/2013  | WAWI  | 06025 | F | 10 | 4 |
| Pemba | 2013 | Chake Chake | 19/4/2013  | WAWI  | 06026 | F | 11 | 4 |
| Pemba | 2013 | Chake Chake | 19/4/2013  | WAWI  | 06027 | F | 10 | 4 |
| Pemba | 2013 | Chake Chake | 19/4/2013  | WAWI  | 06028 | F | 11 | 4 |
| Pemba | 2013 | Chake Chake | 19/4/2013  | WAWI  | 06029 | F | 10 | 4 |
| Pemba | 2013 | Chake Chake | 19/4/2013  | WAWI  | 06030 | F | 11 | 4 |
| Pemba | 2013 | Chake Chake | 19/4/2013  | WAWI  | 06031 | F | 12 | 4 |
| Pemba | 2013 | Chake Chake | 19/4/2013  | WAWI  | 06032 | F | 10 | 4 |
| Pemba | 2013 | Chake Chake | 19/4/2013  | WAWI  | 06033 | F | 11 | 4 |
| Pemba | 2013 | Chake Chake | 19/4/2013  | WAWI  | 06034 | M | 10 | 4 |
| Pemba | 2013 | Chake Chake | 19/4/2013  | WAWI  | 06035 | M | 10 | 4 |
| Pemba | 2013 | Chake Chake | 19/4/2013  | WAWI  | 06036 | M | 11 | 4 |
| Pemba | 2013 | Chake Chake | 19/4/2013  | WAWI  | 06037 | M | 10 | 4 |
| Pemba | 2013 | Chake Chake | 19/4/2013  | WAWI  | 06038 | M | 10 | 4 |



|       |      |             |           |        |       |   |    |   |
|-------|------|-------------|-----------|--------|-------|---|----|---|
| Pemba | 2013 | Chake Chake | 19/4/2013 | WAWI   | 06089 | F | 10 | 3 |
| Pemba | 2013 | Chake Chake | 19/4/2013 | WAWI   | 06090 | F | 10 | 3 |
| Pemba | 2013 | Chake Chake | 19/4/2013 | WAWI   | 06091 | F | 10 | 3 |
| Pemba | 2013 | Chake Chake | 19/4/2013 | WAWI   | 06092 | F | 11 | 3 |
| Pemba | 2013 | Chake Chake | 19/4/2013 | WAWI   | 06093 | F | 9  | 3 |
| Pemba | 2013 | Chake Chake | 19/4/2013 | WAWI   | 06094 | F | 10 | 3 |
| Pemba | 2013 | Chake Chake | 19/4/2013 | WAWI   | 06095 | M | 10 | 3 |
| Pemba | 2013 | Chake Chake | 19/4/2013 | WAWI   | 06096 | M | 10 | 3 |
| Pemba | 2013 | Chake Chake | 19/4/2013 | WAWI   | 06097 | M | 10 | 3 |
| Pemba | 2013 | Chake Chake | 19/4/2013 | WAWI   | 06098 | M | 12 | 3 |
| Pemba | 2013 | Chake Chake | 19/4/2013 | WAWI   | 06099 | M | 11 | 3 |
| Pemba | 2013 | Chake Chake | 19/4/2013 | WAWI   | 06100 | M | 10 | 3 |
| Pemba | 2013 | Chake Chake | 19/4/2013 | WAWI   | 06101 | M | 10 | 3 |
| Pemba | 2013 | Chake Chake | 19/4/2013 | WAWI   | 06102 | M | 10 | 3 |
| Pemba | 2013 | Chake Chake | 19/4/2013 | WAWI   | 06103 | M | 11 | 3 |
| Pemba | 2013 | Chake Chake | 19/4/2013 | WAWI   | 06104 | M | 11 | 3 |
| Pemba | 2013 | Chake Chake | 19/4/2013 | WAWI   | 06105 | M | 10 | 3 |
| Pemba | 2013 | Chake Chake | 19/4/2013 | WAWI   | 06106 | M | 11 | 3 |
| Pemba | 2013 | Chake Chake | 19/4/2013 | WAWI   | 06107 | M | 11 | 3 |
| Pemba | 2013 | Chake Chake | 19/4/2013 | WAWI   | 06108 | M | 11 | 3 |
| Pemba | 2013 | Chake Chake | 19/4/2013 | WAWI   | 06109 | M | 10 | 3 |
| Pemba | 2013 | Chake Chake | 19/4/2013 | WAWI   | 06110 | M | 10 | 3 |
| Pemba | 2013 | Chake Chake | 19/4/2013 | WAWI   | 06111 | M | 10 | 3 |
| Pemba | 2013 | Chake Chake | 19/4/2013 | WAWI   | 06112 | M | 11 | 3 |
| Pemba | 2013 | Chake Chake | 19/4/2013 | WAWI   | 06113 | M | 10 | 3 |
| Pemba | 2013 | Chake Chake | 19/4/2013 | WAWI   | 06114 | M | 9  | 3 |
| Pemba | 2013 | Chake Chake | 19/4/2013 | WAWI   | 06115 | M | 10 | 3 |
| Pemba | 2013 | Chake Chake | 19/4/2013 | WAWI   | 06116 | M | 11 | 3 |
| Pemba | 2013 | Chake Chake | 19/4/2013 | WAWI   | 06117 | M | 10 | 3 |
| Pemba | 2013 | Chake Chake | 19/4/2013 | WAWI   | 06118 | M | 11 | 3 |
| Pemba | 2013 | Chake Chake | 19/4/2013 | WAWI   | 06119 | M | 12 | 3 |
| Pemba | 2013 | Chake Chake | 19/4/2013 | WAWI   | 06120 | M | 10 | 3 |
| Pemba | 2013 | Chake Chake | 19/4/2013 | WAWI   | 06121 | M | 10 | 3 |
| Pemba | 2013 | Chake Chake | 19/4/2013 | WAWI   | 06122 | M | 11 | 3 |
| Pemba | 2013 | Chake Chake | 19/4/2013 | WAWI   | 06123 | M | 9  | 3 |
| Pemba | 2013 | Chake Chake | 19/4/2013 | WAWI   | 06124 | M | 10 | 3 |
| Pemba | 2013 | Chake Chake | 19/4/2013 | WAWI   | 06125 | M | 11 | 3 |
| Pemba | 2013 | Chake Chake | 19/4/2013 | WAWI   | 06126 | M | 10 | 3 |
| Pemba | 2013 | Chake Chake | 19/4/2013 | WAWI   | 06127 | M | 10 | 3 |
| Pemba | 2013 | Chake Chake | 19/4/2013 | WAWI   | 06128 | M | 11 | 3 |
| Pemba | 2013 | Chake Chake | 19/4/2013 | WAWI   | 06129 | M | 11 | 3 |
| Pemba | 2013 | Chake Chake | 19/4/2013 | WAWI   | 06130 | M | 10 | 3 |
| Pemba | 2013 | Chake Chake | 24/4/2013 | SHUNGI | 07001 | F | 12 | 4 |
| Pemba | 2013 | Chake Chake | 24/4/2013 | SHUNGI | 07002 | F | 10 | 4 |
| Pemba | 2013 | Chake Chake | 24/4/2013 | SHUNGI | 07003 | F | 10 | 4 |
| Pemba | 2013 | Chake Chake | 24/4/2013 | SHUNGI | 07004 | F | 10 | 4 |
| Pemba | 2013 | Chake Chake | 24/4/2013 | SHUNGI | 07005 | F | 12 | 4 |
| Pemba | 2013 | Chake Chake | 24/4/2013 | SHUNGI | 07006 | F | 11 | 4 |
| Pemba | 2013 | Chake Chake | 24/4/2013 | SHUNGI | 07007 | F | 12 | 4 |
| Pemba | 2013 | Chake Chake | 24/4/2013 | SHUNGI | 07008 | F | 11 | 4 |





|       |      |             |           |        |       |   |    |   |
|-------|------|-------------|-----------|--------|-------|---|----|---|
| Pemba | 2013 | Chake Chake | 24/4/2013 | SHUNGI | 07059 | F | 10 | 3 |
| Pemba | 2013 | Chake Chake | 24/4/2013 | SHUNGI | 07060 | F | 10 | 3 |
| Pemba | 2013 | Chake Chake | 24/4/2013 | SHUNGI | 07061 | F | 12 | 3 |
| Pemba | 2013 | Chake Chake | 24/4/2013 | SHUNGI | 07062 | F | 11 | 3 |
| Pemba | 2013 | Chake Chake | 24/4/2013 | SHUNGI | 07063 | F | 11 | 3 |
| Pemba | 2013 | Chake Chake | 24/4/2013 | SHUNGI | 07064 | F | 10 | 3 |
| Pemba | 2013 | Chake Chake | 24/4/2013 | SHUNGI | 07065 | F | 10 | 3 |
| Pemba | 2013 | Chake Chake | 24/4/2013 | SHUNGI | 07066 | F | 10 | 3 |
| Pemba | 2013 | Chake Chake | 24/4/2013 | SHUNGI | 07067 | F | 11 | 3 |
| Pemba | 2013 | Chake Chake | 24/4/2013 | SHUNGI | 07068 | F | 9  | 3 |
| Pemba | 2013 | Chake Chake | 24/4/2013 | SHUNGI | 07069 | F | 10 | 3 |
| Pemba | 2013 | Chake Chake | 24/4/2013 | SHUNGI | 07070 | F | 9  | 3 |
| Pemba | 2013 | Chake Chake | 24/4/2013 | SHUNGI | 07071 | F | 11 | 3 |
| Pemba | 2013 | Chake Chake | 24/4/2013 | SHUNGI | 07072 | F | 10 | 3 |
| Pemba | 2013 | Chake Chake | 24/4/2013 | SHUNGI | 07073 | F | 11 | 3 |
| Pemba | 2013 | Chake Chake | 24/4/2013 | SHUNGI | 07074 | F | 11 | 3 |
| Pemba | 2013 | Chake Chake | 24/4/2013 | SHUNGI | 07075 | F | 10 | 3 |
| Pemba | 2013 | Chake Chake | 24/4/2013 | SHUNGI | 07076 | F | 11 | 3 |
| Pemba | 2013 | Chake Chake | 24/4/2013 | SHUNGI | 07077 | F | 10 | 3 |
| Pemba | 2013 | Chake Chake | 24/4/2013 | SHUNGI | 07078 | M | 9  | 3 |
| Pemba | 2013 | Chake Chake | 24/4/2013 | SHUNGI | 07079 | M | 12 | 3 |
| Pemba | 2013 | Chake Chake | 24/4/2013 | SHUNGI | 07080 | M | 10 | 3 |
| Pemba | 2013 | Chake Chake | 24/4/2013 | SHUNGI | 07081 | M | 9  | 3 |
| Pemba | 2013 | Chake Chake | 24/4/2013 | SHUNGI | 07082 | M | 11 | 3 |
| Pemba | 2013 | Chake Chake | 24/4/2013 | SHUNGI | 07083 | M | 12 | 3 |
| Pemba | 2013 | Chake Chake | 24/4/2013 | SHUNGI | 07084 | M | 10 | 3 |
| Pemba | 2013 | Chake Chake | 24/4/2013 | SHUNGI | 07085 | M | 11 | 3 |
| Pemba | 2013 | Chake Chake | 24/4/2013 | SHUNGI | 07086 | M | 11 | 3 |
| Pemba | 2013 | Chake Chake | 24/4/2013 | SHUNGI | 07087 | M | 9  | 3 |
| Pemba | 2013 | Chake Chake | 24/4/2013 | SHUNGI | 07088 | M | 9  | 3 |
| Pemba | 2013 | Chake Chake | 24/4/2013 | SHUNGI | 07089 | M | 9  | 3 |
| Pemba | 2013 | Chake Chake | 24/4/2013 | SHUNGI | 07090 | M | 11 | 3 |
| Pemba | 2013 | Chake Chake | 24/4/2013 | SHUNGI | 07091 | M | 10 | 3 |
| Pemba | 2013 | Chake Chake | 24/4/2013 | SHUNGI | 07092 | M | 10 | 3 |
| Pemba | 2013 | Chake Chake | 24/4/2013 | SHUNGI | 07093 | M | 11 | 3 |
| Pemba | 2013 | Chake Chake | 24/4/2013 | SHUNGI | 07094 | M | 10 | 3 |
| Pemba | 2013 | Chake Chake | 24/4/2013 | SHUNGI | 07095 | M | 10 | 3 |
| Pemba | 2013 | Chake Chake | 24/4/2013 | SHUNGI | 07096 | M | 11 | 3 |
| Pemba | 2013 | Chake Chake | 24/4/2013 | SHUNGI | 07097 | M | 11 | 3 |
| Pemba | 2013 | Chake Chake | 24/4/2013 | SHUNGI | 07098 | M | 10 | 3 |
| Pemba | 2013 | Chake Chake | 24/4/2013 | SHUNGI | 07099 | M | 11 | 3 |
| Pemba | 2013 | Chake Chake | 24/4/2013 | SHUNGI | 07100 | M | 11 | 3 |
| Pemba | 2013 | Chake Chake | 24/4/2013 | SHUNGI | 07101 | M | 11 | 3 |
| Pemba | 2013 | Chake Chake | 24/4/2013 | SHUNGI | 07102 | M | 10 | 3 |
| Pemba | 2013 | Chake Chake | 24/4/2013 | SHUNGI | 07103 | M | 10 | 3 |
| Pemba | 2013 | Chake Chake | 24/4/2013 | SHUNGI | 07104 | M | 10 | 3 |
| Pemba | 2013 | Chake Chake | 24/4/2013 | SHUNGI | 07105 | M | 9  | 3 |
| Pemba | 2013 | Chake Chake | 24/4/2013 | SHUNGI | 07106 | M | 11 | 3 |
| Pemba | 2013 | Chake Chake | 24/4/2013 | SHUNGI | 07107 | M | 11 | 3 |
| Pemba | 2013 | Chake Chake | 24/4/2013 | SHUNGI | 07108 | M | 12 | 3 |







|       |      |             |           |         |       |   |    |   |
|-------|------|-------------|-----------|---------|-------|---|----|---|
| Pemba | 2013 | Chake Chake | 27/3/2013 | MBUZINI | 10013 | F | 9  | 3 |
| Pemba | 2013 | Chake Chake | 27/3/2013 | MBUZINI | 10014 | F | 12 | 3 |
| Pemba | 2013 | Chake Chake | 27/3/2013 | MBUZINI | 10015 | F | 11 | 3 |
| Pemba | 2013 | Chake Chake | 27/3/2013 | MBUZINI | 10016 | F | 10 | 3 |
| Pemba | 2013 | Chake Chake | 27/3/2013 | MBUZINI | 10017 | F | 9  | 3 |
| Pemba | 2013 | Chake Chake | 27/3/2013 | MBUZINI | 10018 | F | 11 | 3 |
| Pemba | 2013 | Chake Chake | 27/3/2013 | MBUZINI | 10019 | F | 9  | 3 |
| Pemba | 2013 | Chake Chake | 27/3/2013 | MBUZINI | 10020 | F | 11 | 3 |
| Pemba | 2013 | Chake Chake | 27/3/2013 | MBUZINI | 10021 | F | 9  | 3 |
| Pemba | 2013 | Chake Chake | 27/3/2013 | MBUZINI | 10022 | F | 11 | 3 |
| Pemba | 2013 | Chake Chake | 27/3/2013 | MBUZINI | 10023 | F | 11 | 3 |
| Pemba | 2013 | Chake Chake | 27/3/2013 | MBUZINI | 10024 | F | 8  | 3 |
| Pemba | 2013 | Chake Chake | 27/3/2013 | MBUZINI | 10025 | F | 11 | 3 |
| Pemba | 2013 | Chake Chake | 27/3/2013 | MBUZINI | 10026 | F | 11 | 3 |
| Pemba | 2013 | Chake Chake | 27/3/2013 | MBUZINI | 10027 | F | 10 | 3 |
| Pemba | 2013 | Chake Chake | 27/3/2013 | MBUZINI | 10028 | F | 12 | 3 |
| Pemba | 2013 | Chake Chake | 27/3/2013 | MBUZINI | 10029 | F | 11 | 3 |
| Pemba | 2013 | Chake Chake | 27/3/2013 | MBUZINI | 10030 | F | 10 | 3 |
| Pemba | 2013 | Chake Chake | 27/3/2013 | MBUZINI | 10031 | F | 10 | 3 |
| Pemba | 2013 | Chake Chake | 27/3/2013 | MBUZINI | 10032 | F | 9  | 3 |
| Pemba | 2013 | Chake Chake | 27/3/2013 | MBUZINI | 10033 | F | 8  | 3 |
| Pemba | 2013 | Chake Chake | 27/3/2013 | MBUZINI | 10034 | M | 9  | 3 |
| Pemba | 2013 | Chake Chake | 27/3/2013 | MBUZINI | 10035 | M | 10 | 3 |
| Pemba | 2013 | Chake Chake | 27/3/2013 | MBUZINI | 10036 | M | 10 | 3 |
| Pemba | 2013 | Chake Chake | 27/3/2013 | MBUZINI | 10037 | M | 12 | 3 |
| Pemba | 2013 | Chake Chake | 27/3/2013 | MBUZINI | 10038 | M | 11 | 3 |
| Pemba | 2013 | Chake Chake | 27/3/2013 | MBUZINI | 10039 | M | 11 | 3 |
| Pemba | 2013 | Chake Chake | 27/3/2013 | MBUZINI | 10040 | M | 11 | 3 |
| Pemba | 2013 | Chake Chake | 27/3/2013 | MBUZINI | 10041 | M | 11 | 3 |
| Pemba | 2013 | Chake Chake | 27/3/2013 | MBUZINI | 10042 | M | 12 | 3 |
| Pemba | 2013 | Chake Chake | 27/3/2013 | MBUZINI | 10043 | M | 10 | 3 |
| Pemba | 2013 | Chake Chake | 27/3/2013 | MBUZINI | 10044 | M | 10 | 3 |
| Pemba | 2013 | Chake Chake | 27/3/2013 | MBUZINI | 10045 | M | 9  | 3 |
| Pemba | 2013 | Chake Chake | 27/3/2013 | MBUZINI | 10046 | M | 10 | 3 |
| Pemba | 2013 | Chake Chake | 27/3/2013 | MBUZINI | 10047 | M | 10 | 3 |
| Pemba | 2013 | Chake Chake | 27/3/2013 | MBUZINI | 10048 | M | 9  | 3 |
| Pemba | 2013 | Chake Chake | 27/3/2013 | MBUZINI | 10049 | M | 12 | 3 |
| Pemba | 2013 | Chake Chake | 27/3/2013 | MBUZINI | 10050 | M | 10 | 3 |
| Pemba | 2013 | Chake Chake | 27/3/2013 | MBUZINI | 10051 | M | 10 | 3 |
| Pemba | 2013 | Chake Chake | 27/3/2013 | MBUZINI | 10052 | M | 12 | 3 |
| Pemba | 2013 | Chake Chake | 27/3/2013 | MBUZINI | 10053 | M | 10 | 3 |
| Pemba | 2013 | Chake Chake | 27/3/2013 | MBUZINI | 10054 | M | 10 | 3 |
| Pemba | 2013 | Chake Chake | 27/3/2013 | MBUZINI | 10055 | M | 11 | 3 |
| Pemba | 2013 | Chake Chake | 27/3/2013 | MBUZINI | 10056 | M | 10 | 3 |
| Pemba | 2013 | Chake Chake | 27/3/2013 | MBUZINI | 10057 | M | 10 | 3 |
| Pemba | 2013 | Chake Chake | 27/3/2013 | MBUZINI | 10058 | M | 10 | 3 |
| Pemba | 2013 | Chake Chake | 27/3/2013 | MBUZINI | 10059 | M | 10 | 3 |
| Pemba | 2013 | Chake Chake | 27/3/2013 | MBUZINI | 10060 | M | 10 | 3 |
| Pemba | 2013 | Chake Chake | 27/3/2013 | MBUZINI | 10061 | M | 12 | 3 |
| Pemba | 2013 | Chake Chake | 27/3/2013 | MBUZINI | 10062 | M | 11 | 3 |



|       |      |             |           |           |       |   |    |   |
|-------|------|-------------|-----------|-----------|-------|---|----|---|
| Pemba | 2013 | Chake Chake | 27/3/2013 | MBUZINI   | 10113 | F | 11 | 4 |
| Pemba | 2013 | Chake Chake | 27/3/2013 | MBUZINI   | 10114 | F | 10 | 4 |
| Pemba | 2013 | Chake Chake | 27/3/2013 | MBUZINI   | 10115 | F | 9  | 4 |
| Pemba | 2013 | Chake Chake | 27/3/2013 | MBUZINI   | 10116 | F | 12 | 4 |
| Pemba | 2013 | Chake Chake | 27/3/2013 | MBUZINI   | 10117 | F | 12 | 4 |
| Pemba | 2013 | Chake Chake | 27/3/2013 | MBUZINI   | 10118 | F | 10 | 4 |
| Pemba | 2013 | Chake Chake | 27/3/2013 | MBUZINI   | 10119 | F | 12 | 4 |
| Pemba | 2013 | Chake Chake | 27/3/2013 | MBUZINI   | 10120 | F | 12 | 4 |
| Pemba | 2013 | Chake Chake | 27/3/2013 | MBUZINI   | 10121 | F | 11 | 4 |
| Pemba | 2013 | Chake Chake | 27/3/2013 | MBUZINI   | 10122 | F | 11 | 4 |
| Pemba | 2013 | Chake Chake | 27/3/2013 | MBUZINI   | 10123 | F | 11 | 4 |
| Pemba | 2013 | Chake Chake | 27/3/2013 | MBUZINI   | 10124 | F | 11 | 4 |
| Pemba | 2013 | Chake Chake | 27/3/2013 | MBUZINI   | 10125 | F | 12 | 4 |
| Pemba | 2013 | Chake Chake | 27/3/2013 | MBUZINI   | 10126 | F | 10 | 4 |
| Pemba | 2013 | Chake Chake | 27/3/2013 | MBUZINI   | 10127 | F | 11 | 4 |
| Pemba | 2013 | Chake Chake | 27/3/2013 | MBUZINI   | 10128 | F | 10 | 4 |
| Pemba | 2013 | Chake Chake | 27/3/2013 | MBUZINI   | 10129 | M | 11 | 4 |
| Pemba | 2013 | Chake Chake | 27/3/2013 | MBUZINI   | 10130 | M | 10 | 4 |
| Pemba | 2013 | Mkoani      | 19/1/2013 | NG'OMBENI | 16001 | F | 9  | 3 |
| Pemba | 2013 | Mkoani      | 19/1/2013 | NG'OMBENI | 16002 | F | 10 | 3 |
| Pemba | 2013 | Mkoani      | 19/1/2013 | NG'OMBENI | 16003 | F | 10 | 3 |
| Pemba | 2013 | Mkoani      | 19/1/2013 | NG'OMBENI | 16004 | F | 9  | 3 |
| Pemba | 2013 | Mkoani      | 19/1/2013 | NG'OMBENI | 16005 | F | 10 | 3 |
| Pemba | 2013 | Mkoani      | 19/1/2013 | NG'OMBENI | 16006 | F | 9  | 3 |
| Pemba | 2013 | Mkoani      | 19/1/2013 | NG'OMBENI | 16007 | F | 10 | 3 |
| Pemba | 2013 | Mkoani      | 19/1/2013 | NG'OMBENI | 16008 | F | 9  | 3 |
| Pemba | 2013 | Mkoani      | 19/1/2013 | NG'OMBENI | 16009 | F | 10 | 3 |
| Pemba | 2013 | Mkoani      | 19/1/2013 | NG'OMBENI | 16010 | F | 9  | 3 |
| Pemba | 2013 | Mkoani      | 19/1/2013 | NG'OMBENI | 16011 | F | 10 | 3 |
| Pemba | 2013 | Mkoani      | 19/1/2013 | NG'OMBENI | 16012 | F | 9  | 3 |
| Pemba | 2013 | Mkoani      | 19/1/2013 | NG'OMBENI | 16013 | F | 9  | 3 |
| Pemba | 2013 | Mkoani      | 19/1/2013 | NG'OMBENI | 16014 | F | 9  | 3 |
| Pemba | 2013 | Mkoani      | 19/1/2013 | NG'OMBENI | 16015 | F | 9  | 3 |
| Pemba | 2013 | Mkoani      | 19/1/2013 | NG'OMBENI | 16016 | F | 10 | 3 |
| Pemba | 2013 | Mkoani      | 19/1/2013 | NG'OMBENI | 16017 | F | 9  | 3 |
| Pemba | 2013 | Mkoani      | 19/1/2013 | NG'OMBENI | 16018 | F | 9  | 3 |
| Pemba | 2013 | Mkoani      | 19/1/2013 | NG'OMBENI | 16019 | F | 9  | 3 |
| Pemba | 2013 | Mkoani      | 19/1/2013 | NG'OMBENI | 16020 | F | 10 | 3 |
| Pemba | 2013 | Mkoani      | 19/1/2013 | NG'OMBENI | 16021 | F | 10 | 3 |
| Pemba | 2013 | Mkoani      | 19/1/2013 | NG'OMBENI | 16022 | F | 10 | 3 |
| Pemba | 2013 | Mkoani      | 19/1/2013 | NG'OMBENI | 16023 | F | 10 | 3 |
| Pemba | 2013 | Mkoani      | 19/1/2013 | NG'OMBENI | 16024 | F | 10 | 3 |
| Pemba | 2013 | Mkoani      | 19/1/2013 | NG'OMBENI | 16025 | F | 10 | 3 |
| Pemba | 2013 | Mkoani      | 19/1/2013 | NG'OMBENI | 16026 | F | 9  | 3 |
| Pemba | 2013 | Mkoani      | 19/1/2013 | NG'OMBENI | 16027 | F | 10 | 3 |
| Pemba | 2013 | Mkoani      | 19/1/2013 | NG'OMBENI | 16028 | F | 10 | 3 |
| Pemba | 2013 | Mkoani      | 19/1/2013 | NG'OMBENI | 16029 | F | 10 | 3 |
| Pemba | 2013 | Mkoani      | 19/1/2013 | NG'OMBENI | 16030 | F | 9  | 3 |
| Pemba | 2013 | Mkoani      | 19/1/2013 | NG'OMBENI | 16031 | F | 10 | 3 |
| Pemba | 2013 | Mkoani      | 19/1/2013 | NG'OMBENI | 16032 | F | 10 | 3 |



|       |      |        |           |           |       |   |    |   |
|-------|------|--------|-----------|-----------|-------|---|----|---|
| Pemba | 2013 | Mkoani | 19/1/2013 | NG'OMBENI | 16033 | F | 10 | 3 |
| Pemba | 2013 | Mkoani | 19/1/2013 | NG'OMBENI | 16034 | F | 10 | 3 |
| Pemba | 2013 | Mkoani | 19/1/2013 | NG'OMBENI | 16035 | F | 9  | 3 |
| Pemba | 2013 | Mkoani | 19/1/2013 | NG'OMBENI | 16036 | F | 9  | 3 |
| Pemba | 2013 | Mkoani | 19/1/2013 | NG'OMBENI | 16037 | F | 10 | 3 |
| Pemba | 2013 | Mkoani | 19/1/2013 | NG'OMBENI | 16038 | F | 10 | 3 |
| Pemba | 2013 | Mkoani | 19/1/2013 | NG'OMBENI | 16039 | F | 10 | 3 |
| Pemba | 2013 | Mkoani | 19/1/2013 | NG'OMBENI | 16040 | F | 10 | 3 |
| Pemba | 2013 | Mkoani | 19/1/2013 | NG'OMBENI | 16041 | F | 10 | 3 |
| Pemba | 2013 | Mkoani | 19/1/2013 | NG'OMBENI | 16042 | F | 10 | 3 |
| Pemba | 2013 | Mkoani | 19/1/2013 | NG'OMBENI | 16043 | F | 10 | 3 |
| Pemba | 2013 | Mkoani | 19/1/2013 | NG'OMBENI | 16044 | F | 9  | 3 |
| Pemba | 2013 | Mkoani | 19/1/2013 | NG'OMBENI | 16045 | F | 10 | 3 |
| Pemba | 2013 | Mkoani | 19/1/2013 | NG'OMBENI | 16046 | F | 9  | 3 |
| Pemba | 2013 | Mkoani | 19/1/2013 | NG'OMBENI | 16047 | F | 11 | 3 |
| Pemba | 2013 | Mkoani | 19/1/2013 | NG'OMBENI | 16048 | F | 10 | 3 |
| Pemba | 2013 | Mkoani | 19/1/2013 | NG'OMBENI | 16049 | F | 10 | 3 |
| Pemba | 2013 | Mkoani | 19/1/2013 | NG'OMBENI | 16050 | F | 9  | 3 |
| Pemba | 2013 | Mkoani | 19/1/2013 | NG'OMBENI | 16051 | F | 9  | 3 |
| Pemba | 2013 | Mkoani | 19/1/2013 | NG'OMBENI | 16052 | F | 10 | 3 |
| Pemba | 2013 | Mkoani | 19/1/2013 | NG'OMBENI | 16053 | F | 9  | 3 |
| Pemba | 2013 | Mkoani | 19/1/2013 | NG'OMBENI | 16054 | F | 9  | 3 |
| Pemba | 2013 | Mkoani | 19/1/2013 | NG'OMBENI | 16055 | F | 9  | 3 |
| Pemba | 2013 | Mkoani | 19/1/2013 | NG'OMBENI | 16056 | F | 9  | 3 |
| Pemba | 2013 | Mkoani | 19/1/2013 | NG'OMBENI | 16057 | F | 10 | 3 |
| Pemba | 2013 | Mkoani | 19/1/2013 | NG'OMBENI | 16058 | F | 9  | 3 |
| Pemba | 2013 | Mkoani | 19/1/2013 | NG'OMBENI | 16059 | F | 9  | 3 |
| Pemba | 2013 | Mkoani | 19/1/2013 | NG'OMBENI | 16060 | F | 10 | 3 |
| Pemba | 2013 | Mkoani | 19/1/2013 | NG'OMBENI | 16061 | F | 10 | 3 |
| Pemba | 2013 | Mkoani | 19/1/2013 | NG'OMBENI | 16062 | M | 10 | 3 |
| Pemba | 2013 | Mkoani | 19/1/2013 | NG'OMBENI | 16063 | M | 9  | 3 |
| Pemba | 2013 | Mkoani | 19/1/2013 | NG'OMBENI | 16064 | M | 10 | 3 |
| Pemba | 2013 | Mkoani | 19/1/2013 | NG'OMBENI | 16065 | M | 10 | 3 |
| Pemba | 2013 | Mkoani | 19/1/2013 | NG'OMBENI | 16066 | M | 10 | 3 |
| Pemba | 2013 | Mkoani | 19/1/2013 | NG'OMBENI | 16067 | M | 9  | 3 |
| Pemba | 2013 | Mkoani | 19/1/2013 | NG'OMBENI | 16068 | M | 9  | 3 |
| Pemba | 2013 | Mkoani | 19/1/2013 | NG'OMBENI | 16069 | M | 10 | 3 |
| Pemba | 2013 | Mkoani | 19/1/2013 | NG'OMBENI | 16070 | M | 9  | 3 |
| Pemba | 2013 | Mkoani | 19/1/2013 | NG'OMBENI | 16071 | M | 9  | 3 |
| Pemba | 2013 | Mkoani | 19/1/2013 | NG'OMBENI | 16072 | M | 10 | 3 |
| Pemba | 2013 | Mkoani | 19/1/2013 | NG'OMBENI | 16073 | M | 9  | 3 |
| Pemba | 2013 | Mkoani | 19/1/2013 | NG'OMBENI | 16074 | M | 10 | 3 |
| Pemba | 2013 | Mkoani | 19/1/2013 | NG'OMBENI | 16075 | M | 9  | 3 |
| Pemba | 2013 | Mkoani | 19/1/2013 | NG'OMBENI | 16076 | M | 10 | 3 |
| Pemba | 2013 | Mkoani | 19/1/2013 | NG'OMBENI | 16077 | M | 9  | 3 |
| Pemba | 2013 | Mkoani | 19/1/2013 | NG'OMBENI | 16078 | M | 10 | 3 |
| Pemba | 2013 | Mkoani | 19/1/2013 | NG'OMBENI | 16079 | M | 9  | 3 |
| Pemba | 2013 | Mkoani | 19/1/2013 | NG'OMBENI | 16080 | M | 9  | 3 |
| Pemba | 2013 | Mkoani | 19/1/2013 | NG'OMBENI | 16081 | M | 10 | 3 |
| Pemba | 2013 | Mkoani | 19/1/2013 | NG'OMBENI | 16082 | M | 10 | 3 |

|       |      |        |           |            |       |   |    |   |
|-------|------|--------|-----------|------------|-------|---|----|---|
| Pemba | 2013 | Mkoani | 19/1/2013 | NG'OMBENI  | 16083 | M | 9  | 3 |
| Pemba | 2013 | Mkoani | 19/1/2013 | NG'OMBENI  | 16084 | M | 10 | 3 |
| Pemba | 2013 | Mkoani | 19/1/2013 | NG'OMBENI  | 16085 | M | 10 | 3 |
| Pemba | 2013 | Mkoani | 19/1/2013 | NG'OMBENI  | 16086 | M | 9  | 3 |
| Pemba | 2013 | Mkoani | 19/1/2013 | NG'OMBENI  | 16087 | M | 10 | 3 |
| Pemba | 2013 | Mkoani | 19/1/2013 | NG'OMBENI  | 16088 | M | 9  | 3 |
| Pemba | 2013 | Mkoani | 19/1/2013 | NG'OMBENI  | 16089 | M | 10 | 3 |
| Pemba | 2013 | Mkoani | 19/1/2013 | NG'OMBENI  | 16090 | M | 10 | 3 |
| Pemba | 2013 | Mkoani | 19/1/2013 | NG'OMBENI  | 16091 | M | 10 | 3 |
| Pemba | 2013 | Mkoani | 19/1/2013 | NG'OMBENI  | 16092 | M | 10 | 3 |
| Pemba | 2013 | Mkoani | 19/1/2013 | NG'OMBENI  | 16093 | M | 10 | 3 |
| Pemba | 2013 | Mkoani | 19/1/2013 | NG'OMBENI  | 16094 | M | 9  | 3 |
| Pemba | 2013 | Mkoani | 19/1/2013 | NG'OMBENI  | 16095 | M | 10 | 3 |
| Pemba | 2013 | Mkoani | 19/1/2013 | NG'OMBENI  | 16096 | M | 9  | 3 |
| Pemba | 2013 | Mkoani | 19/1/2013 | NG'OMBENI  | 16097 | M | 9  | 3 |
| Pemba | 2013 | Mkoani | 19/1/2013 | NG'OMBENI  | 16098 | M | 9  | 3 |
| Pemba | 2013 | Mkoani | 19/1/2013 | NG'OMBENI  | 16099 | M | 9  | 3 |
| Pemba | 2013 | Mkoani | 19/1/2013 | NG'OMBENI  | 16100 | M | 10 | 3 |
| Pemba | 2013 | Mkoani | 19/1/2013 | NG'OMBENI  | 16101 | M | 10 | 3 |
| Pemba | 2013 | Mkoani | 19/1/2013 | NG'OMBENI  | 16102 | M | 10 | 3 |
| Pemba | 2013 | Mkoani | 19/1/2013 | NG'OMBENI  | 16103 | M | 10 | 3 |
| Pemba | 2013 | Mkoani | 19/1/2013 | NG'OMBENI  | 16104 | M | 9  | 3 |
| Pemba | 2013 | Mkoani | 19/1/2013 | NG'OMBENI  | 16105 | M | 10 | 3 |
| Pemba | 2013 | Mkoani | 19/1/2013 | NG'OMBENI  | 16106 | M | 9  | 3 |
| Pemba | 2013 | Mkoani | 19/1/2013 | NG'OMBENI  | 16107 | M | 9  | 3 |
| Pemba | 2013 | Mkoani | 19/1/2013 | NG'OMBENI  | 16108 | M | 9  | 3 |
| Pemba | 2013 | Mkoani | 19/1/2013 | NG'OMBENI  | 16109 | M | 9  | 3 |
| Pemba | 2013 | Mkoani | 19/1/2013 | NG'OMBENI  | 16110 | M | 10 | 3 |
| Pemba | 2013 | Mkoani | 19/1/2013 | NG'OMBENI  | 16111 | M | 10 | 3 |
| Pemba | 2013 | Mkoani | 19/1/2013 | NG'OMBENI  | 16112 | M | 10 | 3 |
| Pemba | 2013 | Mkoani | 19/1/2013 | NG'OMBENI  | 16113 | M | 9  | 3 |
| Pemba | 2013 | Mkoani | 19/1/2013 | NG'OMBENI  | 16114 | M | 9  | 3 |
| Pemba | 2013 | Mkoani | 19/1/2013 | NG'OMBENI  | 16115 | M | 10 | 3 |
| Pemba | 2013 | Mkoani | 19/1/2013 | NG'OMBENI  | 16116 | M | 10 | 3 |
| Pemba | 2013 | Mkoani | 19/1/2013 | NG'OMBENI  | 16117 | M | 10 | 3 |
| Pemba | 2013 | Mkoani | 19/1/2013 | NG'OMBENI  | 16118 | M | 10 | 3 |
| Pemba | 2013 | Mkoani | 19/1/2013 | NG'OMBENI  | 16119 | M | 10 | 3 |
| Pemba | 2013 | Mkoani | 19/1/2013 | NG'OMBENI  | 16120 | M | 9  | 3 |
| Pemba | 2013 | Mkoani | 19/1/2013 | NG'OMBENI  | 16121 | M | 10 | 3 |
| Pemba | 2013 | Mkoani | 19/1/2013 | NG'OMBENI  | 16122 | M | 9  | 3 |
| Pemba | 2013 | Mkoani | 19/1/2013 | NG'OMBENI  | 16123 | M | 9  | 3 |
| Pemba | 2013 | Mkoani | 19/1/2013 | NG'OMBENI  | 16124 | M | 9  | 3 |
| Pemba | 2013 | Mkoani | 19/1/2013 | NG'OMBENI  | 16125 | M | 10 | 3 |
| Pemba | 2013 | Mkoani | 19/1/2013 | NG'OMBENI  | 16126 | M | 10 | 3 |
| Pemba | 2013 | Mkoani | 19/1/2013 | NG'OMBENI  | 16127 | M | 9  | 3 |
| Pemba | 2013 | Mkoani | 19/1/2013 | NG'OMBENI  | 16128 | M | 10 | 3 |
| Pemba | 2013 | Mkoani | 19/1/2013 | NG'OMBENI  | 16129 | M | 9  | 3 |
| Pemba | 2013 | Mkoani | 19/1/2013 | NG'OMBENI  | 16130 | M | 9  | 3 |
| Pemba | 2013 | Mkoani | 20/2/2013 | MKANYAGENI | 17001 | F | 9  | 3 |
| Pemba | 2013 | Mkoani | 20/2/2013 | MKANYAGENI | 17002 | F | 9  | 3 |

|       |      |        |           |            |       |   |    |   |
|-------|------|--------|-----------|------------|-------|---|----|---|
| Pemba | 2013 | Mkoani | 20/2/2013 | MKANYAGENI | 17003 | F | 9  | 3 |
| Pemba | 2013 | Mkoani | 20/2/2013 | MKANYAGENI | 17004 | F | 10 | 3 |
| Pemba | 2013 | Mkoani | 20/2/2013 | MKANYAGENI | 17005 | F | 12 | 3 |
| Pemba | 2013 | Mkoani | 20/2/2013 | MKANYAGENI | 17006 | F | 9  | 3 |
| Pemba | 2013 | Mkoani | 20/2/2013 | MKANYAGENI | 17007 | F | 11 | 3 |
| Pemba | 2013 | Mkoani | 20/2/2013 | MKANYAGENI | 17008 | F | 10 | 3 |
| Pemba | 2013 | Mkoani | 20/2/2013 | MKANYAGENI | 17009 | F | 10 | 3 |
| Pemba | 2013 | Mkoani | 20/2/2013 | MKANYAGENI | 17010 | F | 11 | 3 |
| Pemba | 2013 | Mkoani | 20/2/2013 | MKANYAGENI | 17011 | F | 11 | 3 |
| Pemba | 2013 | Mkoani | 20/2/2013 | MKANYAGENI | 17012 | F | 10 | 3 |
| Pemba | 2013 | Mkoani | 20/2/2013 | MKANYAGENI | 17013 | F | 10 | 3 |
| Pemba | 2013 | Mkoani | 20/2/2013 | MKANYAGENI | 17014 | F | 11 | 3 |
| Pemba | 2013 | Mkoani | 20/2/2013 | MKANYAGENI | 17015 | F | 10 | 3 |
| Pemba | 2013 | Mkoani | 20/2/2013 | MKANYAGENI | 17016 | F | 10 | 3 |
| Pemba | 2013 | Mkoani | 20/2/2013 | MKANYAGENI | 17017 | F | 10 | 3 |
| Pemba | 2013 | Mkoani | 20/2/2013 | MKANYAGENI | 17018 | F | 9  | 3 |
| Pemba | 2013 | Mkoani | 20/2/2013 | MKANYAGENI | 17019 | F | 11 | 3 |
| Pemba | 2013 | Mkoani | 20/2/2013 | MKANYAGENI | 17020 | F | 12 | 3 |
| Pemba | 2013 | Mkoani | 20/2/2013 | MKANYAGENI | 17021 | F | 10 | 3 |
| Pemba | 2013 | Mkoani | 20/2/2013 | MKANYAGENI | 17022 | F | 10 | 3 |
| Pemba | 2013 | Mkoani | 20/2/2013 | MKANYAGENI | 17023 | F | 9  | 3 |
| Pemba | 2013 | Mkoani | 20/2/2013 | MKANYAGENI | 17024 | F | 10 | 3 |
| Pemba | 2013 | Mkoani | 20/2/2013 | MKANYAGENI | 17025 | F | 10 | 3 |
| Pemba | 2013 | Mkoani | 20/2/2013 | MKANYAGENI | 17026 | F | 10 | 3 |
| Pemba | 2013 | Mkoani | 20/2/2013 | MKANYAGENI | 17027 | F | 11 | 3 |
| Pemba | 2013 | Mkoani | 20/2/2013 | MKANYAGENI | 17028 | F | 11 | 3 |
| Pemba | 2013 | Mkoani | 20/2/2013 | MKANYAGENI | 17029 | F | 11 | 3 |
| Pemba | 2013 | Mkoani | 20/2/2013 | MKANYAGENI | 17030 | F | 10 | 3 |
| Pemba | 2013 | Mkoani | 20/2/2013 | MKANYAGENI | 17031 | F | 10 | 3 |
| Pemba | 2013 | Mkoani | 20/2/2013 | MKANYAGENI | 17032 | F | 12 | 3 |
| Pemba | 2013 | Mkoani | 20/2/2013 | MKANYAGENI | 17033 | F | 9  | 3 |
| Pemba | 2013 | Mkoani | 20/2/2013 | MKANYAGENI | 17034 | F | 10 | 3 |
| Pemba | 2013 | Mkoani | 20/2/2013 | MKANYAGENI | 17035 | M | 12 | 3 |
| Pemba | 2013 | Mkoani | 20/2/2013 | MKANYAGENI | 17036 | M | 11 | 3 |
| Pemba | 2013 | Mkoani | 20/2/2013 | MKANYAGENI | 17037 | M | 11 | 3 |
| Pemba | 2013 | Mkoani | 20/2/2013 | MKANYAGENI | 17038 | M | 11 | 3 |
| Pemba | 2013 | Mkoani | 20/2/2013 | MKANYAGENI | 17039 | M | 11 | 3 |
| Pemba | 2013 | Mkoani | 20/2/2013 | MKANYAGENI | 17040 | M | 10 | 3 |
| Pemba | 2013 | Mkoani | 20/2/2013 | MKANYAGENI | 17041 | M | 10 | 3 |
| Pemba | 2013 | Mkoani | 20/2/2013 | MKANYAGENI | 17042 | M | 11 | 3 |
| Pemba | 2013 | Mkoani | 20/2/2013 | MKANYAGENI | 17043 | M | 11 | 3 |
| Pemba | 2013 | Mkoani | 20/2/2013 | MKANYAGENI | 17044 | M | 10 | 3 |
| Pemba | 2013 | Mkoani | 20/2/2013 | MKANYAGENI | 17045 | M | 11 | 3 |
| Pemba | 2013 | Mkoani | 20/2/2013 | MKANYAGENI | 17046 | M | 10 | 3 |
| Pemba | 2013 | Mkoani | 20/2/2013 | MKANYAGENI | 17047 | M | 11 | 3 |
| Pemba | 2013 | Mkoani | 20/2/2013 | MKANYAGENI | 17048 | M | 10 | 3 |
| Pemba | 2013 | Mkoani | 20/2/2013 | MKANYAGENI | 17049 | M | 11 | 3 |
| Pemba | 2013 | Mkoani | 20/2/2013 | MKANYAGENI | 17050 | M | 10 | 3 |
| Pemba | 2013 | Mkoani | 20/2/2013 | MKANYAGENI | 17051 | M | 10 | 3 |
| Pemba | 2013 | Mkoani | 20/2/2013 | MKANYAGENI | 17052 | M | 10 | 3 |



|       |      |        |           |            |       |   |    |   |
|-------|------|--------|-----------|------------|-------|---|----|---|
| Pemba | 2013 | Mkoani | 20/2/2013 | MKANYAGENI | 17103 | F | 11 | 4 |
| Pemba | 2013 | Mkoani | 20/2/2013 | MKANYAGENI | 17104 | F | 11 | 4 |
| Pemba | 2013 | Mkoani | 20/2/2013 | MKANYAGENI | 17105 | F | 10 | 4 |
| Pemba | 2013 | Mkoani | 20/2/2013 | MKANYAGENI | 17106 | F | 11 | 4 |
| Pemba | 2013 | Mkoani | 20/2/2013 | MKANYAGENI | 17107 | F | 10 | 4 |
| Pemba | 2013 | Mkoani | 20/2/2013 | MKANYAGENI | 17108 | F | 12 | 4 |
| Pemba | 2013 | Mkoani | 20/2/2013 | MKANYAGENI | 17109 | F | 11 | 4 |
| Pemba | 2013 | Mkoani | 20/2/2013 | MKANYAGENI | 17110 | F | 11 | 4 |
| Pemba | 2013 | Mkoani | 20/2/2013 | MKANYAGENI | 17111 | F | 10 | 4 |
| Pemba | 2013 | Mkoani | 20/2/2013 | MKANYAGENI | 17112 | F | 11 | 4 |
| Pemba | 2013 | Mkoani | 20/2/2013 | MKANYAGENI | 17113 | M | 11 | 4 |
| Pemba | 2013 | Mkoani | 20/2/2013 | MKANYAGENI | 17114 | M | 10 | 4 |
| Pemba | 2013 | Mkoani | 20/2/2013 | MKANYAGENI | 17115 | M | 11 | 4 |
| Pemba | 2013 | Mkoani | 20/2/2013 | MKANYAGENI | 17116 | M | 11 | 4 |
| Pemba | 2013 | Mkoani | 20/2/2013 | MKANYAGENI | 17117 | M | 11 | 4 |
| Pemba | 2013 | Mkoani | 20/2/2013 | MKANYAGENI | 17118 | M | 11 | 4 |
| Pemba | 2013 | Mkoani | 20/2/2013 | MKANYAGENI | 17119 | M | 11 | 4 |
| Pemba | 2013 | Mkoani | 20/2/2013 | MKANYAGENI | 17120 | M | 11 | 4 |
| Pemba | 2013 | Mkoani | 20/2/2013 | MKANYAGENI | 17121 | M | 10 | 4 |
| Pemba | 2013 | Mkoani | 20/2/2013 | MKANYAGENI | 17122 | M | 11 | 4 |
| Pemba | 2013 | Mkoani | 20/2/2013 | MKANYAGENI | 17123 | M | 11 | 4 |
| Pemba | 2013 | Mkoani | 20/2/2013 | MKANYAGENI | 17124 | M | 11 | 4 |
| Pemba | 2013 | Mkoani | 20/2/2013 | MKANYAGENI | 17125 | M | 11 | 4 |
| Pemba | 2013 | Mkoani | 20/2/2013 | MKANYAGENI | 17126 | M | 11 | 4 |
| Pemba | 2013 | Mkoani | 20/2/2013 | MKANYAGENI | 17127 | M | 11 | 4 |
| Pemba | 2013 | Mkoani | 20/2/2013 | MKANYAGENI | 17128 | M | 11 | 4 |
| Pemba | 2013 | Mkoani | 20/2/2013 | MKANYAGENI | 17129 | M | 11 | 4 |
| Pemba | 2013 | Mkoani | 20/2/2013 | MKANYAGENI | 17130 | M | 11 | 4 |
| Pemba | 2013 | Mkoani | 21/2/2013 | MTAMBILE   | 19001 | F | 10 | 4 |
| Pemba | 2013 | Mkoani | 21/2/2013 | MTAMBILE   | 19002 | F | 11 | 4 |
| Pemba | 2013 | Mkoani | 21/2/2013 | MTAMBILE   | 19003 | F | 11 | 4 |
| Pemba | 2013 | Mkoani | 21/2/2013 | MTAMBILE   | 19004 | F | 10 | 4 |
| Pemba | 2013 | Mkoani | 21/2/2013 | MTAMBILE   | 19005 | F | 10 | 4 |
| Pemba | 2013 | Mkoani | 21/2/2013 | MTAMBILE   | 19006 | F | 9  | 4 |
| Pemba | 2013 | Mkoani | 21/2/2013 | MTAMBILE   | 19007 | F | 10 | 4 |
| Pemba | 2013 | Mkoani | 21/2/2013 | MTAMBILE   | 19008 | F | 11 | 4 |
| Pemba | 2013 | Mkoani | 21/2/2013 | MTAMBILE   | 19009 | F | 11 | 4 |
| Pemba | 2013 | Mkoani | 21/2/2013 | MTAMBILE   | 19010 | F | 11 | 4 |
| Pemba | 2013 | Mkoani | 21/2/2013 | MTAMBILE   | 19011 | F | 10 | 4 |
| Pemba | 2013 | Mkoani | 21/2/2013 | MTAMBILE   | 19012 | F | 10 | 4 |
| Pemba | 2013 | Mkoani | 21/2/2013 | MTAMBILE   | 19013 | F | 10 | 4 |
| Pemba | 2013 | Mkoani | 21/2/2013 | MTAMBILE   | 19014 | F | 10 | 4 |
| Pemba | 2013 | Mkoani | 21/2/2013 | MTAMBILE   | 19015 | F | 12 | 4 |
| Pemba | 2013 | Mkoani | 21/2/2013 | MTAMBILE   | 19016 | F | 10 | 4 |
| Pemba | 2013 | Mkoani | 21/2/2013 | MTAMBILE   | 19017 | F | 11 | 4 |
| Pemba | 2013 | Mkoani | 21/2/2013 | MTAMBILE   | 19018 | F | 10 | 4 |
| Pemba | 2013 | Mkoani | 21/2/2013 | MTAMBILE   | 19019 | F | 12 | 4 |
| Pemba | 2013 | Mkoani | 21/2/2013 | MTAMBILE   | 19020 | F | 12 | 4 |
| Pemba | 2013 | Mkoani | 21/2/2013 | MTAMBILE   | 19021 | F | 11 | 4 |
| Pemba | 2013 | Mkoani | 21/2/2013 | MTAMBILE   | 19022 | F | 11 | 4 |





|       |      |        |            |          |       |   |    |   |
|-------|------|--------|------------|----------|-------|---|----|---|
| Pemba | 2013 | Mkoani | 21/2/2013  | MTAMBILE | 19123 | F | 10 | 3 |
| Pemba | 2013 | Mkoani | 21/2/2013  | MTAMBILE | 19124 | F | 10 | 3 |
| Pemba | 2013 | Mkoani | 21/2/2013  | MTAMBILE | 19125 | F | 10 | 3 |
| Pemba | 2013 | Mkoani | 21/2/2013  | MTAMBILE | 19126 | F | 9  | 3 |
| Pemba | 2013 | Mkoani | 21/2/2013  | MTAMBILE | 19127 | M | 10 | 3 |
| Pemba | 2013 | Mkoani | 21/2/2013  | MTAMBILE | 19128 | M | 10 | 3 |
| Pemba | 2013 | Mkoani | 21/2/2013  | MTAMBILE | 19129 | M | 10 | 3 |
| Pemba | 2013 | Mkoani | 21/2/2013  | MTAMBILE | 19130 | M | 9  | 3 |
| Pemba | 2013 | Mkoani | 05.02.2013 | KANGANI  | 20001 | F | 11 | 4 |
| Pemba | 2013 | Mkoani | 05.02.2013 | KANGANI  | 20002 | F | 10 | 4 |
| Pemba | 2013 | Mkoani | 05.02.2013 | KANGANI  | 20003 | F | 11 | 4 |
| Pemba | 2013 | Mkoani | 05.02.2013 | KANGANI  | 20004 | F | 11 | 4 |
| Pemba | 2013 | Mkoani | 05.02.2013 | KANGANI  | 20005 | F | 11 | 4 |
| Pemba | 2013 | Mkoani | 05.02.2013 | KANGANI  | 20006 | F | 10 | 4 |
| Pemba | 2013 | Mkoani | 05.02.2013 | KANGANI  | 20007 | F | 11 | 4 |
| Pemba | 2013 | Mkoani | 05.02.2013 | KANGANI  | 20008 | F | 10 | 4 |
| Pemba | 2013 | Mkoani | 05.02.2013 | KANGANI  | 20009 | F | 11 | 4 |
| Pemba | 2013 | Mkoani | 05.02.2013 | KANGANI  | 20010 | F | 12 | 4 |
| Pemba | 2013 | Mkoani | 05.02.2013 | KANGANI  | 20011 | F | 10 | 4 |
| Pemba | 2013 | Mkoani | 05.02.2013 | KANGANI  | 20012 | F | 12 | 4 |
| Pemba | 2013 | Mkoani | 05.02.2013 | KANGANI  | 20013 | F | 11 | 4 |
| Pemba | 2013 | Mkoani | 05.02.2013 | KANGANI  | 20014 | F | 10 | 4 |
| Pemba | 2013 | Mkoani | 05.02.2013 | KANGANI  | 20015 | F | 10 | 4 |
| Pemba | 2013 | Mkoani | 05.02.2013 | KANGANI  | 20016 | F | 10 | 4 |
| Pemba | 2013 | Mkoani | 05.02.2013 | KANGANI  | 20017 | F | 11 | 4 |
| Pemba | 2013 | Mkoani | 05.02.2013 | KANGANI  | 20018 | F | 11 | 4 |
| Pemba | 2013 | Mkoani | 05.02.2013 | KANGANI  | 20019 | F | 10 | 4 |
| Pemba | 2013 | Mkoani | 05.02.2013 | KANGANI  | 20020 | F | 11 | 4 |
| Pemba | 2013 | Mkoani | 05.02.2013 | KANGANI  | 20021 | F | 10 | 4 |
| Pemba | 2013 | Mkoani | 05.02.2013 | KANGANI  | 20022 | F | 11 | 4 |
| Pemba | 2013 | Mkoani | 05.02.2013 | KANGANI  | 20023 | F | 11 | 4 |
| Pemba | 2013 | Mkoani | 05.02.2013 | KANGANI  | 20024 | F | 11 | 4 |
| Pemba | 2013 | Mkoani | 05.02.2013 | KANGANI  | 20025 | F | 11 | 4 |
| Pemba | 2013 | Mkoani | 05.02.2013 | KANGANI  | 20026 | F | 11 | 4 |
| Pemba | 2013 | Mkoani | 05.02.2013 | KANGANI  | 20027 | F | 11 | 4 |
| Pemba | 2013 | Mkoani | 05.02.2013 | KANGANI  | 20028 | F | 11 | 4 |
| Pemba | 2013 | Mkoani | 05.02.2013 | KANGANI  | 20029 | F | 11 | 4 |
| Pemba | 2013 | Mkoani | 05.02.2013 | KANGANI  | 20030 | F | 12 | 4 |
| Pemba | 2013 | Mkoani | 05.02.2013 | KANGANI  | 20031 | F | 12 | 4 |
| Pemba | 2013 | Mkoani | 05.02.2013 | KANGANI  | 20032 | F | 10 | 4 |
| Pemba | 2013 | Mkoani | 05.02.2013 | KANGANI  | 20033 | F | 10 | 4 |
| Pemba | 2013 | Mkoani | 05.02.2013 | KANGANI  | 20034 | F | 11 | 4 |
| Pemba | 2013 | Mkoani | 05.02.2013 | KANGANI  | 20035 | F | 11 | 4 |
| Pemba | 2013 | Mkoani | 05.02.2013 | KANGANI  | 20036 | F | 10 | 4 |
| Pemba | 2013 | Mkoani | 05.02.2013 | KANGANI  | 20037 | F | 11 | 4 |
| Pemba | 2013 | Mkoani | 05.02.2013 | KANGANI  | 20038 | F | 12 | 4 |
| Pemba | 2013 | Mkoani | 05.02.2013 | KANGANI  | 20039 | F | 11 | 4 |
| Pemba | 2013 | Mkoani | 05.02.2013 | KANGANI  | 20040 | F | 11 | 4 |
| Pemba | 2013 | Mkoani | 05.02.2013 | KANGANI  | 20041 | F | 10 | 4 |
| Pemba | 2013 | Mkoani | 05.02.2013 | KANGANI  | 20042 | F | 12 | 4 |





|       |      |        |            |         |       |   |    |   |
|-------|------|--------|------------|---------|-------|---|----|---|
| Pemba | 2013 | Mkoani | 05.02.2013 | KANGANI | 20093 | F | 10 | 3 |
| Pemba | 2013 | Mkoani | 05.02.2013 | KANGANI | 20094 | F | 11 | 3 |
| Pemba | 2013 | Mkoani | 05.02.2013 | KANGANI | 20095 | F | 10 | 3 |
| Pemba | 2013 | Mkoani | 05.02.2013 | KANGANI | 20096 | F | 10 | 3 |
| Pemba | 2013 | Mkoani | 05.02.2013 | KANGANI | 20097 | F | 11 | 3 |
| Pemba | 2013 | Mkoani | 05.02.2013 | KANGANI | 20098 | F | 10 | 3 |
| Pemba | 2013 | Mkoani | 05.02.2013 | KANGANI | 20099 | F | 10 | 3 |
| Pemba | 2013 | Mkoani | 05.02.2013 | KANGANI | 20100 | F | 11 | 3 |
| Pemba | 2013 | Mkoani | 05.02.2013 | KANGANI | 20101 | M | 10 | 3 |
| Pemba | 2013 | Mkoani | 05.02.2013 | KANGANI | 20102 | M | 10 | 3 |
| Pemba | 2013 | Mkoani | 05.02.2013 | KANGANI | 20103 | M | 11 | 3 |
| Pemba | 2013 | Mkoani | 05.02.2013 | KANGANI | 20104 | M | 10 | 3 |
| Pemba | 2013 | Mkoani | 05.02.2013 | KANGANI | 20105 | M | 10 | 3 |
| Pemba | 2013 | Mkoani | 05.02.2013 | KANGANI | 20106 | M | 10 | 3 |
| Pemba | 2013 | Mkoani | 05.02.2013 | KANGANI | 20107 | M | 11 | 3 |
| Pemba | 2013 | Mkoani | 05.02.2013 | KANGANI | 20108 | M | 11 | 3 |
| Pemba | 2013 | Mkoani | 05.02.2013 | KANGANI | 20109 | M | 10 | 3 |
| Pemba | 2013 | Mkoani | 05.02.2013 | KANGANI | 20110 | M | 11 | 3 |
| Pemba | 2013 | Mkoani | 05.02.2013 | KANGANI | 20111 | M | 10 | 3 |
| Pemba | 2013 | Mkoani | 05.02.2013 | KANGANI | 20112 | M | 11 | 3 |
| Pemba | 2013 | Mkoani | 05.02.2013 | KANGANI | 20113 | M | 10 | 3 |
| Pemba | 2013 | Mkoani | 05.02.2013 | KANGANI | 20114 | M | 10 | 3 |
| Pemba | 2013 | Mkoani | 05.02.2013 | KANGANI | 20115 | M | 10 | 3 |
| Pemba | 2013 | Mkoani | 05.02.2013 | KANGANI | 20116 | M | 11 | 3 |
| Pemba | 2013 | Mkoani | 05.02.2013 | KANGANI | 20117 | M | 11 | 3 |
| Pemba | 2013 | Mkoani | 05.02.2013 | KANGANI | 20118 | M | 11 | 3 |
| Pemba | 2013 | Mkoani | 05.02.2013 | KANGANI | 20119 | M | 11 | 3 |
| Pemba | 2013 | Mkoani | 05.02.2013 | KANGANI | 20120 | M | 10 | 3 |
| Pemba | 2013 | Mkoani | 05.02.2013 | KANGANI | 20121 | M | 11 | 3 |
| Pemba | 2013 | Mkoani | 05.02.2013 | KANGANI | 20122 | M | 10 | 3 |
| Pemba | 2013 | Mkoani | 05.02.2013 | KANGANI | 20123 | M | 10 | 3 |
| Pemba | 2013 | Mkoani | 05.02.2013 | KANGANI | 20124 | M | 10 | 3 |
| Pemba | 2013 | Mkoani | 05.02.2013 | KANGANI | 20125 | M | 10 | 3 |
| Pemba | 2013 | Mkoani | 05.02.2013 | KANGANI | 20126 | M | 10 | 3 |
| Pemba | 2013 | Mkoani | 05.02.2013 | KANGANI | 20127 | M | 11 | 3 |
| Pemba | 2013 | Mkoani | 05.02.2013 | KANGANI | 20128 | M | 10 | 3 |
| Pemba | 2013 | Mkoani | 05.02.2013 | KANGANI | 20129 | M | 11 | 3 |
| Pemba | 2013 | Mkoani | 05.02.2013 | KANGANI | 20130 | M | 10 | 3 |
| Pemba | 2013 | Mkoani | 30/4/2013  | KENGEJA | 21001 | F | 12 | 4 |
| Pemba | 2013 | Mkoani | 30/4/2013  | KENGEJA | 21002 | F | 10 | 4 |
| Pemba | 2013 | Mkoani | 30/4/2013  | KENGEJA | 21003 | F | 10 | 4 |
| Pemba | 2013 | Mkoani | 30/4/2013  | KENGEJA | 21004 | F | 11 | 4 |
| Pemba | 2013 | Mkoani | 30/4/2013  | KENGEJA | 21005 | F | 10 | 4 |
| Pemba | 2013 | Mkoani | 30/4/2013  | KENGEJA | 21006 | F | 12 | 4 |
| Pemba | 2013 | Mkoani | 30/4/2013  | KENGEJA | 21007 | F | 11 | 4 |
| Pemba | 2013 | Mkoani | 30/4/2013  | KENGEJA | 21008 | F | 10 | 4 |
| Pemba | 2013 | Mkoani | 30/4/2013  | KENGEJA | 21009 | F | 11 | 4 |
| Pemba | 2013 | Mkoani | 30/4/2013  | KENGEJA | 21010 | F | 11 | 4 |
| Pemba | 2013 | Mkoani | 30/4/2013  | KENGEJA | 21011 | F | 10 | 4 |
| Pemba | 2013 | Mkoani | 30/4/2013  | KENGEJA | 21012 | F | 10 | 4 |

|       |      |        |           |         |       |   |    |   |
|-------|------|--------|-----------|---------|-------|---|----|---|
| Pemba | 2013 | Mkoani | 30/4/2013 | KENGEJA | 21013 | F | 11 | 4 |
| Pemba | 2013 | Mkoani | 30/4/2013 | KENGEJA | 21014 | F | 11 | 4 |
| Pemba | 2013 | Mkoani | 30/4/2013 | KENGEJA | 21015 | F | 12 | 4 |
| Pemba | 2013 | Mkoani | 30/4/2013 | KENGEJA | 21016 | F | 11 | 4 |
| Pemba | 2013 | Mkoani | 30/4/2013 | KENGEJA | 21017 | F | 11 | 4 |
| Pemba | 2013 | Mkoani | 30/4/2013 | KENGEJA | 21018 | F | 10 | 4 |
| Pemba | 2013 | Mkoani | 30/4/2013 | KENGEJA | 21019 | F | 11 | 4 |
| Pemba | 2013 | Mkoani | 30/4/2013 | KENGEJA | 21020 | F | 12 | 4 |
| Pemba | 2013 | Mkoani | 30/4/2013 | KENGEJA | 21021 | F | 10 | 4 |
| Pemba | 2013 | Mkoani | 30/4/2013 | KENGEJA | 21022 | F | 11 | 4 |
| Pemba | 2013 | Mkoani | 30/4/2013 | KENGEJA | 21023 | F | 10 | 4 |
| Pemba | 2013 | Mkoani | 30/4/2013 | KENGEJA | 21024 | F | 10 | 4 |
| Pemba | 2013 | Mkoani | 30/4/2013 | KENGEJA | 21025 | M | 11 | 4 |
| Pemba | 2013 | Mkoani | 30/4/2013 | KENGEJA | 21026 | M | 12 | 4 |
| Pemba | 2013 | Mkoani | 30/4/2013 | KENGEJA | 21027 | M | 12 | 4 |
| Pemba | 2013 | Mkoani | 30/4/2013 | KENGEJA | 21028 | M | 11 | 4 |
| Pemba | 2013 | Mkoani | 30/4/2013 | KENGEJA | 21029 | M | 10 | 4 |
| Pemba | 2013 | Mkoani | 30/4/2013 | KENGEJA | 21030 | M | 11 | 4 |
| Pemba | 2013 | Mkoani | 30/4/2013 | KENGEJA | 21031 | M | 11 | 4 |
| Pemba | 2013 | Mkoani | 30/4/2013 | KENGEJA | 21032 | M | 11 | 4 |
| Pemba | 2013 | Mkoani | 30/4/2013 | KENGEJA | 21033 | M | 10 | 4 |
| Pemba | 2013 | Mkoani | 30/4/2013 | KENGEJA | 21034 | M | 10 | 4 |
| Pemba | 2013 | Mkoani | 30/4/2013 | KENGEJA | 21035 | M | 12 | 4 |
| Pemba | 2013 | Mkoani | 30/4/2013 | KENGEJA | 21036 | M | 11 | 4 |
| Pemba | 2013 | Mkoani | 30/4/2013 | KENGEJA | 21037 | M | 11 | 4 |
| Pemba | 2013 | Mkoani | 30/4/2013 | KENGEJA | 21038 | M | 11 | 4 |
| Pemba | 2013 | Mkoani | 30/4/2013 | KENGEJA | 21039 | M | 12 | 4 |
| Pemba | 2013 | Mkoani | 30/4/2013 | KENGEJA | 21040 | M | 10 | 4 |
| Pemba | 2013 | Mkoani | 30/4/2013 | KENGEJA | 21041 | M | 10 | 4 |
| Pemba | 2013 | Mkoani | 30/4/2013 | KENGEJA | 21042 | M | 12 | 4 |
| Pemba | 2013 | Mkoani | 30/4/2013 | KENGEJA | 21043 | M | 10 | 4 |
| Pemba | 2013 | Mkoani | 30/4/2013 | KENGEJA | 21044 | M | 10 | 4 |
| Pemba | 2013 | Mkoani | 30/4/2013 | KENGEJA | 21045 | M | 11 | 4 |
| Pemba | 2013 | Mkoani | 30/4/2013 | KENGEJA | 21046 | M | 12 | 4 |
| Pemba | 2013 | Mkoani | 30/4/2013 | KENGEJA | 21047 | M | 10 | 4 |
| Pemba | 2013 | Mkoani | 30/4/2013 | KENGEJA | 21048 | M | 10 | 4 |
| Pemba | 2013 | Mkoani | 30/4/2013 | KENGEJA | 21049 | M | 11 | 4 |
| Pemba | 2013 | Mkoani | 30/4/2013 | KENGEJA | 21050 | F | 11 | 4 |
| Pemba | 2013 | Mkoani | 30/4/2013 | KENGEJA | 21051 | F | 10 | 4 |
| Pemba | 2013 | Mkoani | 30/4/2013 | KENGEJA | 21052 | F | 11 | 4 |
| Pemba | 2013 | Mkoani | 30/4/2013 | KENGEJA | 21053 | F | 11 | 4 |
| Pemba | 2013 | Mkoani | 30/4/2013 | KENGEJA | 21054 | F | 11 | 4 |
| Pemba | 2013 | Mkoani | 30/4/2013 | KENGEJA | 21055 | M | 11 | 4 |
| Pemba | 2013 | Mkoani | 30/4/2013 | KENGEJA | 21056 | F | 10 | 4 |
| Pemba | 2013 | Mkoani | 30/4/2013 | KENGEJA | 21057 | F | 12 | 4 |
| Pemba | 2013 | Mkoani | 30/4/2013 | KENGEJA | 21058 | M | 11 | 4 |
| Pemba | 2013 | Mkoani | 30/4/2013 | KENGEJA | 21059 | M | 10 | 4 |
| Pemba | 2013 | Mkoani | 30/4/2013 | KENGEJA | 21060 | M | 10 | 4 |
| Pemba | 2013 | Mkoani | 30/4/2013 | KENGEJA | 21061 | M | 11 | 4 |
| Pemba | 2013 | Mkoani | 30/4/2013 | KENGEJA | 21062 | M | 11 | 4 |

|       |      |        |           |         |       |   |    |   |
|-------|------|--------|-----------|---------|-------|---|----|---|
| Pemba | 2013 | Mkoani | 30/4/2013 | KENGEJA | 21063 | M | 11 | 4 |
| Pemba | 2013 | Mkoani | 30/4/2013 | KENGEJA | 21064 | M | 10 | 4 |
| Pemba | 2013 | Mkoani | 30/4/2013 | KENGEJA | 21065 | M | 10 | 4 |
| Pemba | 2013 | Mkoani | 30/4/2013 | KENGEJA | 21066 | M | 11 | 4 |
| Pemba | 2013 | Mkoani | 30/4/2013 | KENGEJA | 21067 | F | 12 | 4 |
| Pemba | 2013 | Mkoani | 30/4/2013 | KENGEJA | 21068 | F | 12 | 4 |
| Pemba | 2013 | Mkoani | 30/4/2013 | KENGEJA | 21069 | M | 11 | 4 |
| Pemba | 2013 | Mkoani | 30/4/2013 | KENGEJA | 21070 | M | 11 | 4 |
| Pemba | 2013 | Mkoani | 30/4/2013 | KENGEJA | 21071 | M | 12 | 4 |
| Pemba | 2013 | Mkoani | 30/4/2013 | KENGEJA | 21072 | M | 11 | 4 |
| Pemba | 2013 | Mkoani | 30/4/2013 | KENGEJA | 21073 | M | 12 | 4 |
| Pemba | 2013 | Mkoani | 30/4/2013 | KENGEJA | 21074 | M | 12 | 4 |
| Pemba | 2013 | Mkoani | 30/4/2013 | KENGEJA | 21075 | M | 11 | 4 |
| Pemba | 2013 | Mkoani | 30/4/2013 | KENGEJA | 21076 | M | 9  | 3 |
| Pemba | 2013 | Mkoani | 30/4/2013 | KENGEJA | 21077 | M | 9  | 3 |
| Pemba | 2013 | Mkoani | 30/4/2013 | KENGEJA | 21078 | M | 9  | 3 |
| Pemba | 2013 | Mkoani | 30/4/2013 | KENGEJA | 21079 | M | 9  | 3 |
| Pemba | 2013 | Mkoani | 30/4/2013 | KENGEJA | 21080 | M | 9  | 3 |
| Pemba | 2013 | Mkoani | 30/4/2013 | KENGEJA | 21081 | F | 9  | 3 |
| Pemba | 2013 | Mkoani | 30/4/2013 | KENGEJA | 21082 | F | 9  | 3 |
| Pemba | 2013 | Mkoani | 30/4/2013 | KENGEJA | 21083 | F | 9  | 3 |
| Pemba | 2013 | Mkoani | 30/4/2013 | KENGEJA | 21084 | F | 10 | 3 |
| Pemba | 2013 | Mkoani | 30/4/2013 | KENGEJA | 21085 | F | 9  | 3 |
| Pemba | 2013 | Mkoani | 30/4/2013 | KENGEJA | 21086 | F | 9  | 3 |
| Pemba | 2013 | Mkoani | 30/4/2013 | KENGEJA | 21087 | F | 9  | 3 |
| Pemba | 2013 | Mkoani | 30/4/2013 | KENGEJA | 21088 | F | 9  | 3 |
| Pemba | 2013 | Mkoani | 30/4/2013 | KENGEJA | 21089 | F | 10 | 3 |
| Pemba | 2013 | Mkoani | 30/4/2013 | KENGEJA | 21090 | F | 9  | 3 |
| Pemba | 2013 | Mkoani | 30/4/2013 | KENGEJA | 21091 | F | 9  | 3 |
| Pemba | 2013 | Mkoani | 30/4/2013 | KENGEJA | 21092 | F | 9  | 3 |
| Pemba | 2013 | Mkoani | 30/4/2013 | KENGEJA | 21093 | M | 9  | 3 |
| Pemba | 2013 | Mkoani | 30/4/2013 | KENGEJA | 21094 | M | 10 | 3 |
| Pemba | 2013 | Mkoani | 30/4/2013 | KENGEJA | 21095 | M | 10 | 3 |
| Pemba | 2013 | Mkoani | 30/4/2013 | KENGEJA | 21096 | M | 9  | 3 |
| Pemba | 2013 | Mkoani | 30/4/2013 | KENGEJA | 21097 | M | 11 | 3 |
| Pemba | 2013 | Mkoani | 30/4/2013 | KENGEJA | 21098 | M | 11 | 3 |
| Pemba | 2013 | Mkoani | 30/4/2013 | KENGEJA | 21099 | M | 9  | 3 |
| Pemba | 2013 | Mkoani | 30/4/2013 | KENGEJA | 21100 | M | 9  | 3 |
| Pemba | 2013 | Mkoani | 30/4/2013 | KENGEJA | 21101 | M | 9  | 3 |
| Pemba | 2013 | Mkoani | 30/4/2013 | KENGEJA | 21102 | M | 9  | 3 |
| Pemba | 2013 | Mkoani | 30/4/2013 | KENGEJA | 21103 | F | 10 | 3 |
| Pemba | 2013 | Mkoani | 30/4/2013 | KENGEJA | 21104 | M | 10 | 3 |
| Pemba | 2013 | Mkoani | 30/4/2013 | KENGEJA | 21105 | M | 9  | 3 |
| Pemba | 2013 | Mkoani | 30/4/2013 | KENGEJA | 21106 | M | 9  | 3 |
| Pemba | 2013 | Mkoani | 30/4/2013 | KENGEJA | 21107 | F | 9  | 3 |
| Pemba | 2013 | Mkoani | 30/4/2013 | KENGEJA | 21108 | F | 9  | 3 |
| Pemba | 2013 | Mkoani | 30/4/2013 | KENGEJA | 21109 | F | 9  | 3 |
| Pemba | 2013 | Mkoani | 30/4/2013 | KENGEJA | 21110 | F | 9  | 3 |
| Pemba | 2013 | Mkoani | 30/4/2013 | KENGEJA | 21111 | F | 9  | 3 |
| Pemba | 2013 | Mkoani | 30/4/2013 | KENGEJA | 21112 | F | 10 | 3 |

|       |      |        |           |           |       |   |    |   |
|-------|------|--------|-----------|-----------|-------|---|----|---|
| Pemba | 2013 | Mkoani | 30/4/2013 | KENGEJA   | 21113 | F | 9  | 3 |
| Pemba | 2013 | Mkoani | 30/4/2013 | KENGEJA   | 21114 | F | 9  | 3 |
| Pemba | 2013 | Mkoani | 30/4/2013 | KENGEJA   | 21115 | F | 9  | 3 |
| Pemba | 2013 | Mkoani | 30/4/2013 | KENGEJA   | 21116 | F | 9  | 3 |
| Pemba | 2013 | Mkoani | 30/4/2013 | KENGEJA   | 21117 | F | 10 | 3 |
| Pemba | 2013 | Mkoani | 30/4/2013 | KENGEJA   | 21118 | F | 11 | 3 |
| Pemba | 2013 | Mkoani | 30/4/2013 | KENGEJA   | 21119 | F | 9  | 3 |
| Pemba | 2013 | Mkoani | 30/4/2013 | KENGEJA   | 21120 | F | 9  | 3 |
| Pemba | 2013 | Mkoani | 30/4/2013 | KENGEJA   | 21121 | F | 9  | 3 |
| Pemba | 2013 | Mkoani | 30/4/2013 | KENGEJA   | 21122 | F | 9  | 3 |
| Pemba | 2013 | Mkoani | 30/4/2013 | KENGEJA   | 21123 | F | 10 | 3 |
| Pemba | 2013 | Mkoani | 30/4/2013 | KENGEJA   | 21124 | F | 9  | 3 |
| Pemba | 2013 | Mkoani | 30/4/2013 | KENGEJA   | 21125 | F | 9  | 3 |
| Pemba | 2013 | Mkoani | 30/4/2013 | KENGEJA   | 21126 | M | 9  | 3 |
| Pemba | 2013 | Mkoani | 30/4/2013 | KENGEJA   | 21127 | F | 9  | 3 |
| Pemba | 2013 | Mkoani | 30/4/2013 | KENGEJA   | 21128 | M | 9  | 3 |
| Pemba | 2013 | Mkoani | 30/4/2013 | KENGEJA   | 21129 | M | 9  | 3 |
| Pemba | 2013 | Mkoani | 30/4/2013 | KENGEJA   | 21130 | M | 10 | 3 |
| Pemba | 2013 | Mkoani | 22/2/2013 | NGWACHANI | 25001 | F | 11 | 4 |
| Pemba | 2013 | Mkoani | 22/2/2013 | NGWACHANI | 25002 | F | 10 | 4 |
| Pemba | 2013 | Mkoani | 22/2/2013 | NGWACHANI | 25003 | F | 11 | 4 |
| Pemba | 2013 | Mkoani | 22/2/2013 | NGWACHANI | 25004 | F | 11 | 4 |
| Pemba | 2013 | Mkoani | 22/2/2013 | NGWACHANI | 25005 | F | 11 | 4 |
| Pemba | 2013 | Mkoani | 22/2/2013 | NGWACHANI | 25006 | F | 11 | 4 |
| Pemba | 2013 | Mkoani | 22/2/2013 | NGWACHANI | 25007 | F | 11 | 4 |
| Pemba | 2013 | Mkoani | 22/2/2013 | NGWACHANI | 25008 | F | 11 | 4 |
| Pemba | 2013 | Mkoani | 22/2/2013 | NGWACHANI | 25009 | F | 12 | 4 |
| Pemba | 2013 | Mkoani | 22/2/2013 | NGWACHANI | 25010 | F | 12 | 4 |
| Pemba | 2013 | Mkoani | 22/2/2013 | NGWACHANI | 25011 | F | 11 | 4 |
| Pemba | 2013 | Mkoani | 22/2/2013 | NGWACHANI | 25012 | F | 12 | 4 |
| Pemba | 2013 | Mkoani | 22/2/2013 | NGWACHANI | 25013 | F | 12 | 4 |
| Pemba | 2013 | Mkoani | 22/2/2013 | NGWACHANI | 25014 | F | 12 | 4 |
| Pemba | 2013 | Mkoani | 22/2/2013 | NGWACHANI | 25015 | F | 11 | 4 |
| Pemba | 2013 | Mkoani | 22/2/2013 | NGWACHANI | 25016 | M | 12 | 4 |
| Pemba | 2013 | Mkoani | 22/2/2013 | NGWACHANI | 25017 | M | 12 | 4 |
| Pemba | 2013 | Mkoani | 22/2/2013 | NGWACHANI | 25018 | M | 12 | 4 |
| Pemba | 2013 | Mkoani | 22/2/2013 | NGWACHANI | 25019 | M | 12 | 4 |
| Pemba | 2013 | Mkoani | 22/2/2013 | NGWACHANI | 25020 | M | 11 | 4 |
| Pemba | 2013 | Mkoani | 22/2/2013 | NGWACHANI | 25021 | M | 11 | 4 |
| Pemba | 2013 | Mkoani | 22/2/2013 | NGWACHANI | 25022 | M | 11 | 4 |
| Pemba | 2013 | Mkoani | 22/2/2013 | NGWACHANI | 25023 | M | 12 | 4 |
| Pemba | 2013 | Mkoani | 22/2/2013 | NGWACHANI | 25024 | M | 12 | 4 |
| Pemba | 2013 | Mkoani | 22/2/2013 | NGWACHANI | 25025 | M | 11 | 4 |
| Pemba | 2013 | Mkoani | 22/2/2013 | NGWACHANI | 25026 | M | 11 | 4 |
| Pemba | 2013 | Mkoani | 22/2/2013 | NGWACHANI | 25027 | M | 11 | 4 |
| Pemba | 2013 | Mkoani | 22/2/2013 | NGWACHANI | 25028 | M | 11 | 4 |
| Pemba | 2013 | Mkoani | 22/2/2013 | NGWACHANI | 25029 | M | 11 | 4 |
| Pemba | 2013 | Mkoani | 22/2/2013 | NGWACHANI | 25030 | M | 12 | 4 |
| Pemba | 2013 | Mkoani | 22/2/2013 | NGWACHANI | 25031 | M | 11 | 4 |
| Pemba | 2013 | Mkoani | 22/2/2013 | NGWACHANI | 25032 | M | 11 | 4 |



|       |      |        |           |           |       |   |    |   |
|-------|------|--------|-----------|-----------|-------|---|----|---|
| Pemba | 2013 | Mkoani | 22/2/2013 | NGWACHANI | 25083 | F | 10 | 4 |
| Pemba | 2013 | Mkoani | 22/2/2013 | NGWACHANI | 25084 | F | 11 | 4 |
| Pemba | 2013 | Mkoani | 22/2/2013 | NGWACHANI | 25085 | F | 11 | 4 |
| Pemba | 2013 | Mkoani | 22/2/2013 | NGWACHANI | 25086 | F | 10 | 4 |
| Pemba | 2013 | Mkoani | 22/2/2013 | NGWACHANI | 25087 | F | 11 | 4 |
| Pemba | 2013 | Mkoani | 22/2/2013 | NGWACHANI | 25088 | F | 10 | 4 |
| Pemba | 2013 | Mkoani | 22/2/2013 | NGWACHANI | 25089 | M | 10 | 4 |
| Pemba | 2013 | Mkoani | 22/2/2013 | NGWACHANI | 25090 | M | 11 | 4 |
| Pemba | 2013 | Mkoani | 22/2/2013 | NGWACHANI | 25091 | M | 11 | 4 |
| Pemba | 2013 | Mkoani | 22/2/2013 | NGWACHANI | 25092 | M | 10 | 4 |
| Pemba | 2013 | Mkoani | 22/2/2013 | NGWACHANI | 25093 | M | 10 | 4 |
| Pemba | 2013 | Mkoani | 22/2/2013 | NGWACHANI | 25094 | M | 12 | 4 |
| Pemba | 2013 | Mkoani | 22/2/2013 | NGWACHANI | 25095 | M | 10 | 4 |
| Pemba | 2013 | Mkoani | 22/2/2013 | NGWACHANI | 25096 | M | 11 | 4 |
| Pemba | 2013 | Mkoani | 22/2/2013 | NGWACHANI | 25097 | M | 11 | 4 |
| Pemba | 2013 | Mkoani | 22/2/2013 | NGWACHANI | 25098 | M | 11 | 4 |
| Pemba | 2013 | Mkoani | 22/2/2013 | NGWACHANI | 25099 | M | 10 | 4 |
| Pemba | 2013 | Mkoani | 22/2/2013 | NGWACHANI | 25100 | M | 10 | 4 |
| Pemba | 2013 | Mkoani | 22/2/2013 | NGWACHANI | 25101 | M | 10 | 3 |
| Pemba | 2013 | Mkoani | 22/2/2013 | NGWACHANI | 25102 | M | 10 | 3 |
| Pemba | 2013 | Mkoani | 22/2/2013 | NGWACHANI | 25103 | M | 10 | 3 |
| Pemba | 2013 | Mkoani | 22/2/2013 | NGWACHANI | 25104 | M | 11 | 3 |
| Pemba | 2013 | Mkoani | 22/2/2013 | NGWACHANI | 25105 | M | 10 | 3 |
| Pemba | 2013 | Mkoani | 22/2/2013 | NGWACHANI | 25106 | M | 10 | 3 |
| Pemba | 2013 | Mkoani | 22/2/2013 | NGWACHANI | 25107 | M | 10 | 3 |
| Pemba | 2013 | Mkoani | 22/2/2013 | NGWACHANI | 25108 | M | 11 | 3 |
| Pemba | 2013 | Mkoani | 22/2/2013 | NGWACHANI | 25109 | M | 10 | 3 |
| Pemba | 2013 | Mkoani | 22/2/2013 | NGWACHANI | 25110 | M | 9  | 3 |
| Pemba | 2013 | Mkoani | 22/2/2013 | NGWACHANI | 25111 | M | 9  | 3 |
| Pemba | 2013 | Mkoani | 22/2/2013 | NGWACHANI | 25112 | M | 10 | 3 |
| Pemba | 2013 | Mkoani | 22/2/2013 | NGWACHANI | 25113 | M | 10 | 3 |
| Pemba | 2013 | Mkoani | 22/2/2013 | NGWACHANI | 25114 | M | 10 | 3 |
| Pemba | 2013 | Mkoani | 22/2/2013 | NGWACHANI | 25115 | M | 9  | 3 |
| Pemba | 2013 | Mkoani | 22/2/2013 | NGWACHANI | 25116 | F | 10 | 3 |
| Pemba | 2013 | Mkoani | 22/2/2013 | NGWACHANI | 25117 | F | 10 | 3 |
| Pemba | 2013 | Mkoani | 22/2/2013 | NGWACHANI | 25118 | F | 11 | 3 |
| Pemba | 2013 | Mkoani | 22/2/2013 | NGWACHANI | 25119 | F | 11 | 3 |
| Pemba | 2013 | Mkoani | 22/2/2013 | NGWACHANI | 25120 | F | 10 | 3 |
| Pemba | 2013 | Mkoani | 22/2/2013 | NGWACHANI | 25121 | F | 10 | 3 |
| Pemba | 2013 | Mkoani | 22/2/2013 | NGWACHANI | 25122 | F | 10 | 3 |
| Pemba | 2013 | Mkoani | 22/2/2013 | NGWACHANI | 25123 | F | 9  | 3 |
| Pemba | 2013 | Mkoani | 22/2/2013 | NGWACHANI | 25124 | F | 9  | 3 |
| Pemba | 2013 | Mkoani | 22/2/2013 | NGWACHANI | 25125 | F | 10 | 3 |
| Pemba | 2013 | Mkoani | 22/2/2013 | NGWACHANI | 25126 | F | 10 | 3 |
| Pemba | 2013 | Mkoani | 22/2/2013 | NGWACHANI | 25127 | F | 9  | 3 |
| Pemba | 2013 | Mkoani | 22/2/2013 | NGWACHANI | 25128 | F | 10 | 3 |
| Pemba | 2013 | Mkoani | 22/2/2013 | NGWACHANI | 25129 | F | 9  | 3 |
| Pemba | 2013 | Mkoani | 22/2/2013 | NGWACHANI | 25130 | F | 10 | 3 |
| Pemba | 2013 | Wete   | 17/4/2013 | OLE       | 26001 | F | 12 | 4 |
| Pemba | 2013 | Wete   | 17/4/2013 | OLE       | 26002 | F | 11 | 4 |

|       |      |      |           |     |       |   |    |   |
|-------|------|------|-----------|-----|-------|---|----|---|
| Pemba | 2013 | Wete | 17/4/2013 | OLE | 26003 | F | 11 | 4 |
| Pemba | 2013 | Wete | 17/4/2013 | OLE | 26004 | F | 12 | 4 |
| Pemba | 2013 | Wete | 17/4/2013 | OLE | 26005 | F | 12 | 4 |
| Pemba | 2013 | Wete | 17/4/2013 | OLE | 26006 | F | 10 | 4 |
| Pemba | 2013 | Wete | 17/4/2013 | OLE | 26007 | F | 10 | 4 |
| Pemba | 2013 | Wete | 17/4/2013 | OLE | 26008 | F | 11 | 4 |
| Pemba | 2013 | Wete | 17/4/2013 | OLE | 26009 | F | 11 | 4 |
| Pemba | 2013 | Wete | 17/4/2013 | OLE | 26010 | F | 11 | 4 |
| Pemba | 2013 | Wete | 17/4/2013 | OLE | 26011 | F | 11 | 4 |
| Pemba | 2013 | Wete | 17/4/2013 | OLE | 26012 | F | 10 | 4 |
| Pemba | 2013 | Wete | 17/4/2013 | OLE | 26013 | F | 12 | 4 |
| Pemba | 2013 | Wete | 17/4/2013 | OLE | 26014 | F | 10 | 4 |
| Pemba | 2013 | Wete | 17/4/2013 | OLE | 26015 | F | 11 | 4 |
| Pemba | 2013 | Wete | 17/4/2013 | OLE | 26016 | F | 12 | 4 |
| Pemba | 2013 | Wete | 17/4/2013 | OLE | 26017 | F | 12 | 4 |
| Pemba | 2013 | Wete | 17/4/2013 | OLE | 26018 | F | 12 | 4 |
| Pemba | 2013 | Wete | 17/4/2013 | OLE | 26019 | F | 12 | 4 |
| Pemba | 2013 | Wete | 17/4/2013 | OLE | 26020 | F | 11 | 4 |
| Pemba | 2013 | Wete | 17/4/2013 | OLE | 26021 | F | 11 | 4 |
| Pemba | 2013 | Wete | 17/4/2013 | OLE | 26022 | F | 12 | 4 |
| Pemba | 2013 | Wete | 17/4/2013 | OLE | 26023 | F | 10 | 4 |
| Pemba | 2013 | Wete | 17/4/2013 | OLE | 26024 | F | 10 | 4 |
| Pemba | 2013 | Wete | 17/4/2013 | OLE | 26025 | F | 10 | 4 |
| Pemba | 2013 | Wete | 17/4/2013 | OLE | 26026 | F | 11 | 4 |
| Pemba | 2013 | Wete | 17/4/2013 | OLE | 26027 | F | 11 | 4 |
| Pemba | 2013 | Wete | 17/4/2013 | OLE | 26028 | F | 11 | 4 |
| Pemba | 2013 | Wete | 17/4/2013 | OLE | 26029 | F | 11 | 4 |
| Pemba | 2013 | Wete | 17/4/2013 | OLE | 26030 | F | 11 | 4 |
| Pemba | 2013 | Wete | 17/4/2013 | OLE | 26031 | F | 11 | 4 |
| Pemba | 2013 | Wete | 17/4/2013 | OLE | 26032 | F | 10 | 4 |
| Pemba | 2013 | Wete | 17/4/2013 | OLE | 26033 | F | 10 | 4 |
| Pemba | 2013 | Wete | 17/4/2013 | OLE | 26034 | F | 10 | 4 |
| Pemba | 2013 | Wete | 17/4/2013 | OLE | 26035 | M | 12 | 4 |
| Pemba | 2013 | Wete | 17/4/2013 | OLE | 26036 | M | 10 | 4 |
| Pemba | 2013 | Wete | 17/4/2013 | OLE | 26037 | M | 11 | 4 |
| Pemba | 2013 | Wete | 17/4/2013 | OLE | 26038 | M | 12 | 4 |
| Pemba | 2013 | Wete | 17/4/2013 | OLE | 26039 | M | 11 | 4 |
| Pemba | 2013 | Wete | 17/4/2013 | OLE | 26040 | M | 12 | 4 |
| Pemba | 2013 | Wete | 17/4/2013 | OLE | 26041 | M | 11 | 4 |
| Pemba | 2013 | Wete | 17/4/2013 | OLE | 26042 | M | 12 | 4 |
| Pemba | 2013 | Wete | 17/4/2013 | OLE | 26043 | M | 10 | 4 |
| Pemba | 2013 | Wete | 17/4/2013 | OLE | 26044 | M | 11 | 4 |
| Pemba | 2013 | Wete | 17/4/2013 | OLE | 26045 | M | 10 | 4 |
| Pemba | 2013 | Wete | 17/4/2013 | OLE | 26046 | M | 12 | 4 |
| Pemba | 2013 | Wete | 17/4/2013 | OLE | 26047 | M | 11 | 4 |
| Pemba | 2013 | Wete | 17/4/2013 | OLE | 26048 | M | 11 | 4 |
| Pemba | 2013 | Wete | 17/4/2013 | OLE | 26049 | M | 11 | 4 |
| Pemba | 2013 | Wete | 17/4/2013 | OLE | 26050 | M | 11 | 4 |
| Pemba | 2013 | Wete | 17/4/2013 | OLE | 26051 | M | 10 | 4 |
| Pemba | 2013 | Wete | 17/4/2013 | OLE | 26052 | M | 12 | 4 |



|       |      |      |           |     |       |   |    |   |
|-------|------|------|-----------|-----|-------|---|----|---|
| Pemba | 2013 | Wete | 17/4/2013 | OLE | 26053 | M | 11 | 4 |
| Pemba | 2013 | Wete | 17/4/2013 | OLE | 26054 | M | 11 | 4 |
| Pemba | 2013 | Wete | 17/4/2013 | OLE | 26055 | M | 12 | 4 |
| Pemba | 2013 | Wete | 17/4/2013 | OLE | 26056 | M | 12 | 4 |
| Pemba | 2013 | Wete | 17/4/2013 | OLE | 26057 | M | 12 | 4 |
| Pemba | 2013 | Wete | 17/4/2013 | OLE | 26058 | M | 12 | 4 |
| Pemba | 2013 | Wete | 17/4/2013 | OLE | 26059 | M | 11 | 4 |
| Pemba | 2013 | Wete | 17/4/2013 | OLE | 26060 | M | 9  | 4 |
| Pemba | 2013 | Wete | 17/4/2013 | OLE | 26061 | M | 11 | 4 |
| Pemba | 2013 | Wete | 17/4/2013 | OLE | 26062 | M | 10 | 4 |
| Pemba | 2013 | Wete | 17/4/2013 | OLE | 26063 | M | 12 | 4 |
| Pemba | 2013 | Wete | 17/4/2013 | OLE | 26064 | M | 11 | 4 |
| Pemba | 2013 | Wete | 17/4/2013 | OLE | 26065 | M | 12 | 4 |
| Pemba | 2013 | Wete | 17/4/2013 | OLE | 26066 | M | 9  | 3 |
| Pemba | 2013 | Wete | 17/4/2013 | OLE | 26067 | F | 10 | 3 |
| Pemba | 2013 | Wete | 17/4/2013 | OLE | 26068 | F | 10 | 3 |
| Pemba | 2013 | Wete | 17/4/2013 | OLE | 26069 | F | 9  | 3 |
| Pemba | 2013 | Wete | 17/4/2013 | OLE | 26070 | F | 9  | 3 |
| Pemba | 2013 | Wete | 17/4/2013 | OLE | 26071 | F | 9  | 3 |
| Pemba | 2013 | Wete | 17/4/2013 | OLE | 26072 | F | 11 | 3 |
| Pemba | 2013 | Wete | 17/4/2013 | OLE | 26073 | F | 9  | 3 |
| Pemba | 2013 | Wete | 17/4/2013 | OLE | 26074 | F | 9  | 3 |
| Pemba | 2013 | Wete | 17/4/2013 | OLE | 26075 | F | 9  | 3 |
| Pemba | 2013 | Wete | 17/4/2013 | OLE | 26076 | F | 9  | 3 |
| Pemba | 2013 | Wete | 17/4/2013 | OLE | 26077 | F | 9  | 3 |
| Pemba | 2013 | Wete | 17/4/2013 | OLE | 26078 | F | 9  | 3 |
| Pemba | 2013 | Wete | 17/4/2013 | OLE | 26079 | F | 10 | 3 |
| Pemba | 2013 | Wete | 17/4/2013 | OLE | 26080 | F | 10 | 3 |
| Pemba | 2013 | Wete | 17/4/2013 | OLE | 26081 | F | 9  | 3 |
| Pemba | 2013 | Wete | 17/4/2013 | OLE | 26082 | F | 10 | 3 |
| Pemba | 2013 | Wete | 17/4/2013 | OLE | 26083 | F | 10 | 3 |
| Pemba | 2013 | Wete | 17/4/2013 | OLE | 26084 | F | 10 | 3 |
| Pemba | 2013 | Wete | 17/4/2013 | OLE | 26085 | M | 11 | 3 |
| Pemba | 2013 | Wete | 17/4/2013 | OLE | 26086 | M | 9  | 3 |
| Pemba | 2013 | Wete | 17/4/2013 | OLE | 26087 | M | 9  | 3 |
| Pemba | 2013 | Wete | 17/4/2013 | OLE | 26088 | M | 10 | 3 |
| Pemba | 2013 | Wete | 17/4/2013 | OLE | 26089 | M | 11 | 3 |
| Pemba | 2013 | Wete | 17/4/2013 | OLE | 26090 | M | 11 | 3 |
| Pemba | 2013 | Wete | 17/4/2013 | OLE | 26091 | M | 12 | 3 |
| Pemba | 2013 | Wete | 17/4/2013 | OLE | 26092 | M | 11 | 3 |
| Pemba | 2013 | Wete | 17/4/2013 | OLE | 26093 | M | 9  | 3 |
| Pemba | 2013 | Wete | 17/4/2013 | OLE | 26094 | M | 11 | 3 |
| Pemba | 2013 | Wete | 17/4/2013 | OLE | 26095 | M | 12 | 3 |
| Pemba | 2013 | Wete | 17/4/2013 | OLE | 26096 | M | 11 | 3 |
| Pemba | 2013 | Wete | 17/4/2013 | OLE | 26097 | M | 10 | 3 |
| Pemba | 2013 | Wete | 17/4/2013 | OLE | 26098 | M | 9  | 3 |
| Pemba | 2013 | Wete | 17/4/2013 | OLE | 26099 | M | 10 | 3 |
| Pemba | 2013 | Wete | 17/4/2013 | OLE | 26100 | M | 10 | 3 |
| Pemba | 2013 | Wete | 17/4/2013 | OLE | 26101 | M | 11 | 3 |
| Pemba | 2013 | Wete | 17/4/2013 | OLE | 26102 | F | 10 | 3 |

|       |      |           |           |           |       |   |    |   |
|-------|------|-----------|-----------|-----------|-------|---|----|---|
| Pemba | 2013 | Wete      | 17/4/2013 | OLE       | 26103 | F | 9  | 3 |
| Pemba | 2013 | Wete      | 17/4/2013 | OLE       | 26104 | F | 9  | 3 |
| Pemba | 2013 | Wete      | 17/4/2013 | OLE       | 26105 | F | 10 | 3 |
| Pemba | 2013 | Wete      | 17/4/2013 | OLE       | 26106 | F | 9  | 3 |
| Pemba | 2013 | Wete      | 17/4/2013 | OLE       | 26107 | F | 8  | 3 |
| Pemba | 2013 | Wete      | 17/4/2013 | OLE       | 26108 | F | 9  | 3 |
| Pemba | 2013 | Wete      | 17/4/2013 | OLE       | 26109 | F | 10 | 3 |
| Pemba | 2013 | Wete      | 17/4/2013 | OLE       | 26110 | F | 9  | 3 |
| Pemba | 2013 | Wete      | 17/4/2013 | OLE       | 26111 | F | 9  | 3 |
| Pemba | 2013 | Wete      | 17/4/2013 | OLE       | 26112 | F | 9  | 3 |
| Pemba | 2013 | Wete      | 17/4/2013 | OLE       | 26113 | F | 9  | 3 |
| Pemba | 2013 | Wete      | 17/4/2013 | OLE       | 26114 | F | 9  | 3 |
| Pemba | 2013 | Wete      | 17/4/2013 | OLE       | 26115 | F | 9  | 3 |
| Pemba | 2013 | Wete      | 17/4/2013 | OLE       | 26116 | F | 10 | 3 |
| Pemba | 2013 | Wete      | 17/4/2013 | OLE       | 26117 | F | 9  | 3 |
| Pemba | 2013 | Wete      | 17/4/2013 | OLE       | 26118 | F | 9  | 3 |
| Pemba | 2013 | Wete      | 17/4/2013 | OLE       | 26119 | F | 9  | 3 |
| Pemba | 2013 | Wete      | 17/4/2013 | OLE       | 26120 | F | 10 | 3 |
| Pemba | 2013 | Wete      | 17/4/2013 | OLE       | 26121 | M | 12 | 3 |
| Pemba | 2013 | Wete      | 17/4/2013 | OLE       | 26122 | M | 11 | 3 |
| Pemba | 2013 | Wete      | 17/4/2013 | OLE       | 26123 | M | 10 | 3 |
| Pemba | 2013 | Wete      | 17/4/2013 | OLE       | 26124 | M | 11 | 3 |
| Pemba | 2013 | Wete      | 17/4/2013 | OLE       | 26125 | M | 10 | 3 |
| Pemba | 2013 | Wete      | 17/4/2013 | OLE       | 26126 | M | 12 | 3 |
| Pemba | 2013 | Wete      | 17/4/2013 | OLE       | 26127 | M | 12 | 3 |
| Pemba | 2013 | Wete      | 17/4/2013 | OLE       | 26128 | M | 12 | 3 |
| Pemba | 2013 | Wete      | 17/4/2013 | OLE       | 26129 | M | 12 | 3 |
| Pemba | 2013 | Wete      | 17/4/2013 | OLE       | 26130 | M | 10 | 3 |
| Pemba | 2013 | Micheweni | 18/3/2013 | MAKANGALE | 40001 | F | 12 | 4 |
| Pemba | 2013 | Micheweni | 18/3/2013 | MAKANGALE | 40002 | F | 12 | 4 |
| Pemba | 2013 | Micheweni | 18/3/2013 | MAKANGALE | 40003 | F | 10 | 4 |
| Pemba | 2013 | Micheweni | 18/3/2013 | MAKANGALE | 40004 | F | 10 | 4 |
| Pemba | 2013 | Micheweni | 18/3/2013 | MAKANGALE | 40005 | F | 12 | 4 |
| Pemba | 2013 | Micheweni | 18/3/2013 | MAKANGALE | 40006 | F | 10 | 4 |
| Pemba | 2013 | Micheweni | 18/3/2013 | MAKANGALE | 40007 | F | 10 | 4 |
| Pemba | 2013 | Micheweni | 18/3/2013 | MAKANGALE | 40008 | F | 11 | 4 |
| Pemba | 2013 | Micheweni | 18/3/2013 | MAKANGALE | 40009 | F | 10 | 4 |
| Pemba | 2013 | Micheweni | 18/3/2013 | MAKANGALE | 40010 | F | 10 | 4 |
| Pemba | 2013 | Micheweni | 18/3/2013 | MAKANGALE | 40011 | F | 12 | 4 |
| Pemba | 2013 | Micheweni | 18/3/2013 | MAKANGALE | 40012 | F | 9  | 4 |
| Pemba | 2013 | Micheweni | 18/3/2013 | MAKANGALE | 40013 | F | 9  | 4 |
| Pemba | 2013 | Micheweni | 18/3/2013 | MAKANGALE | 40014 | F | 10 | 4 |
| Pemba | 2013 | Micheweni | 18/3/2013 | MAKANGALE | 40015 | F | 11 | 4 |
| Pemba | 2013 | Micheweni | 18/3/2013 | MAKANGALE | 40016 | F | 12 | 4 |
| Pemba | 2013 | Micheweni | 18/3/2013 | MAKANGALE | 40017 | F | 10 | 4 |
| Pemba | 2013 | Micheweni | 18/3/2013 | MAKANGALE | 40018 | F | 10 | 4 |
| Pemba | 2013 | Micheweni | 18/3/2013 | MAKANGALE | 40019 | F | 10 | 4 |
| Pemba | 2013 | Micheweni | 18/3/2013 | MAKANGALE | 40020 | F | 12 | 4 |
| Pemba | 2013 | Micheweni | 18/3/2013 | MAKANGALE | 40021 | F | 10 | 4 |
| Pemba | 2013 | Micheweni | 18/3/2013 | MAKANGALE | 40022 | F | 10 | 4 |

|       |      |           |           |           |       |   |    |   |
|-------|------|-----------|-----------|-----------|-------|---|----|---|
| Pemba | 2013 | Micheweni | 18/3/2013 | MAKANGALE | 40023 | F | 10 | 4 |
| Pemba | 2013 | Micheweni | 18/3/2013 | MAKANGALE | 40024 | F | 10 | 4 |
| Pemba | 2013 | Micheweni | 18/3/2013 | MAKANGALE | 40025 | F | 12 | 4 |
| Pemba | 2013 | Micheweni | 18/3/2013 | MAKANGALE | 40026 | F | 10 | 4 |
| Pemba | 2013 | Micheweni | 18/3/2013 | MAKANGALE | 40027 | F | 12 | 4 |
| Pemba | 2013 | Micheweni | 18/3/2013 | MAKANGALE | 40028 | F | 9  | 4 |
| Pemba | 2013 | Micheweni | 18/3/2013 | MAKANGALE | 40029 | F | 9  | 4 |
| Pemba | 2013 | Micheweni | 18/3/2013 | MAKANGALE | 40030 | F | 9  | 4 |
| Pemba | 2013 | Micheweni | 18/3/2013 | MAKANGALE | 40031 | F | 12 | 4 |
| Pemba | 2013 | Micheweni | 18/3/2013 | MAKANGALE | 40032 | F | 10 | 4 |
| Pemba | 2013 | Micheweni | 18/3/2013 | MAKANGALE | 40033 | F | 12 | 4 |
| Pemba | 2013 | Micheweni | 18/3/2013 | MAKANGALE | 40034 | F | 10 | 4 |
| Pemba | 2013 | Micheweni | 18/3/2013 | MAKANGALE | 40035 | F | 10 | 4 |
| Pemba | 2013 | Micheweni | 18/3/2013 | MAKANGALE | 40036 | F | 9  | 4 |
| Pemba | 2013 | Micheweni | 18/3/2013 | MAKANGALE | 40037 | F | 10 | 4 |
| Pemba | 2013 | Micheweni | 18/3/2013 | MAKANGALE | 40038 | F | 11 | 4 |
| Pemba | 2013 | Micheweni | 18/3/2013 | MAKANGALE | 40039 | F | 10 | 4 |
| Pemba | 2013 | Micheweni | 18/3/2013 | MAKANGALE | 40040 | M | 12 | 4 |
| Pemba | 2013 | Micheweni | 18/3/2013 | MAKANGALE | 40041 | M | 12 | 4 |
| Pemba | 2013 | Micheweni | 18/3/2013 | MAKANGALE | 40042 | M | 12 | 4 |
| Pemba | 2013 | Micheweni | 18/3/2013 | MAKANGALE | 40043 | M | 12 | 4 |
| Pemba | 2013 | Micheweni | 18/3/2013 | MAKANGALE | 40044 | M | 11 | 4 |
| Pemba | 2013 | Micheweni | 18/3/2013 | MAKANGALE | 40045 | M | 10 | 4 |
| Pemba | 2013 | Micheweni | 18/3/2013 | MAKANGALE | 40046 | M | 10 | 4 |
| Pemba | 2013 | Micheweni | 18/3/2013 | MAKANGALE | 40047 | M | 12 | 4 |
| Pemba | 2013 | Micheweni | 18/3/2013 | MAKANGALE | 40048 | M | 12 | 4 |
| Pemba | 2013 | Micheweni | 18/3/2013 | MAKANGALE | 40049 | M | 11 | 4 |
| Pemba | 2013 | Micheweni | 18/3/2013 | MAKANGALE | 40050 | M | 12 | 4 |
| Pemba | 2013 | Micheweni | 18/3/2013 | MAKANGALE | 40051 | M | 10 | 4 |
| Pemba | 2013 | Micheweni | 18/3/2013 | MAKANGALE | 40052 | M | 12 | 4 |
| Pemba | 2013 | Micheweni | 18/3/2013 | MAKANGALE | 40053 | M | 12 | 4 |
| Pemba | 2013 | Micheweni | 18/3/2013 | MAKANGALE | 40054 | M | 10 | 4 |
| Pemba | 2013 | Micheweni | 18/3/2013 | MAKANGALE | 40055 | M | 10 | 4 |
| Pemba | 2013 | Micheweni | 18/3/2013 | MAKANGALE | 40056 | M | 11 | 4 |
| Pemba | 2013 | Micheweni | 18/3/2013 | MAKANGALE | 40057 | M | 12 | 4 |
| Pemba | 2013 | Micheweni | 18/3/2013 | MAKANGALE | 40058 | M | 10 | 4 |
| Pemba | 2013 | Micheweni | 18/3/2013 | MAKANGALE | 40059 | M | 11 | 4 |
| Pemba | 2013 | Micheweni | 18/3/2013 | MAKANGALE | 40060 | M | 12 | 4 |
| Pemba | 2013 | Micheweni | 18/3/2013 | MAKANGALE | 40061 | M | 10 | 4 |
| Pemba | 2013 | Micheweni | 18/3/2013 | MAKANGALE | 40062 | M | 12 | 4 |
| Pemba | 2013 | Micheweni | 18/3/2013 | MAKANGALE | 40063 | M | 10 | 4 |
| Pemba | 2013 | Micheweni | 18/3/2013 | MAKANGALE | 40064 | M | 10 | 4 |
| Pemba | 2013 | Micheweni | 18/3/2013 | MAKANGALE | 40065 | M | 12 | 4 |
| Pemba | 2013 | Micheweni | 18/3/2013 | MAKANGALE | 40066 | F | 12 | 4 |
| Pemba | 2013 | Micheweni | 18/3/2013 | MAKANGALE | 40067 | F | 9  | 4 |
| Pemba | 2013 | Micheweni | 18/3/2013 | MAKANGALE | 40068 | F | 9  | 4 |
| Pemba | 2013 | Micheweni | 18/3/2013 | MAKANGALE | 40069 | F | 9  | 4 |
| Pemba | 2013 | Micheweni | 18/3/2013 | MAKANGALE | 40070 | F | 11 | 4 |
| Pemba | 2013 | Micheweni | 18/3/2013 | MAKANGALE | 40071 | F | 11 | 3 |
| Pemba | 2013 | Micheweni | 18/3/2013 | MAKANGALE | 40072 | F | 10 | 3 |

|       |      |           |           |           |       |   |    |   |
|-------|------|-----------|-----------|-----------|-------|---|----|---|
| Pemba | 2013 | Micheweni | 18/3/2013 | MAKANGALE | 40073 | F | 11 | 3 |
| Pemba | 2013 | Micheweni | 18/3/2013 | MAKANGALE | 40074 | F | 11 | 3 |
| Pemba | 2013 | Micheweni | 18/3/2013 | MAKANGALE | 40075 | F | 10 | 3 |
| Pemba | 2013 | Micheweni | 18/3/2013 | MAKANGALE | 40076 | F | 9  | 3 |
| Pemba | 2013 | Micheweni | 18/3/2013 | MAKANGALE | 40077 | F | 10 | 3 |
| Pemba | 2013 | Micheweni | 18/3/2013 | MAKANGALE | 40078 | F | 10 | 3 |
| Pemba | 2013 | Micheweni | 18/3/2013 | MAKANGALE | 40079 | F | 12 | 3 |
| Pemba | 2013 | Micheweni | 18/3/2013 | MAKANGALE | 40080 | F | 10 | 3 |
| Pemba | 2013 | Micheweni | 18/3/2013 | MAKANGALE | 40081 | F | 10 | 3 |
| Pemba | 2013 | Micheweni | 18/3/2013 | MAKANGALE | 40082 | F | 10 | 3 |
| Pemba | 2013 | Micheweni | 18/3/2013 | MAKANGALE | 40083 | F | 11 | 3 |
| Pemba | 2013 | Micheweni | 18/3/2013 | MAKANGALE | 40084 | F | 10 | 3 |
| Pemba | 2013 | Micheweni | 18/3/2013 | MAKANGALE | 40085 | F | 11 | 3 |
| Pemba | 2013 | Micheweni | 18/3/2013 | MAKANGALE | 40086 | F | 10 | 3 |
| Pemba | 2013 | Micheweni | 18/3/2013 | MAKANGALE | 40087 | F | 10 | 3 |
| Pemba | 2013 | Micheweni | 18/3/2013 | MAKANGALE | 40088 | F | 11 | 3 |
| Pemba | 2013 | Micheweni | 18/3/2013 | MAKANGALE | 40089 | F | 11 | 3 |
| Pemba | 2013 | Micheweni | 18/3/2013 | MAKANGALE | 40090 | F | 10 | 3 |
| Pemba | 2013 | Micheweni | 18/3/2013 | MAKANGALE | 40091 | F | 10 | 3 |
| Pemba | 2013 | Micheweni | 18/3/2013 | MAKANGALE | 40092 | F | 10 | 3 |
| Pemba | 2013 | Micheweni | 18/3/2013 | MAKANGALE | 40093 | F | 9  | 3 |
| Pemba | 2013 | Micheweni | 18/3/2013 | MAKANGALE | 40094 | F | 9  | 3 |
| Pemba | 2013 | Micheweni | 18/3/2013 | MAKANGALE | 40095 | F | 9  | 3 |
| Pemba | 2013 | Micheweni | 18/3/2013 | MAKANGALE | 40096 | F | 11 | 3 |
| Pemba | 2013 | Micheweni | 18/3/2013 | MAKANGALE | 40097 | F | 9  | 3 |
| Pemba | 2013 | Micheweni | 18/3/2013 | MAKANGALE | 40098 | F | 11 | 3 |
| Pemba | 2013 | Micheweni | 18/3/2013 | MAKANGALE | 40099 | F | 9  | 3 |
| Pemba | 2013 | Micheweni | 18/3/2013 | MAKANGALE | 40100 | F | 9  | 3 |
| Pemba | 2013 | Micheweni | 18/3/2013 | MAKANGALE | 40101 | F | 10 | 3 |
| Pemba | 2013 | Micheweni | 18/3/2013 | MAKANGALE | 40102 | F | 9  | 3 |
| Pemba | 2013 | Micheweni | 18/3/2013 | MAKANGALE | 40103 | M | 10 | 3 |
| Pemba | 2013 | Micheweni | 18/3/2013 | MAKANGALE | 40104 | M | 11 | 3 |
| Pemba | 2013 | Micheweni | 18/3/2013 | MAKANGALE | 40105 | M | 12 | 3 |
| Pemba | 2013 | Micheweni | 18/3/2013 | MAKANGALE | 40106 | M | 11 | 3 |
| Pemba | 2013 | Micheweni | 18/3/2013 | MAKANGALE | 40107 | M | 9  | 3 |
| Pemba | 2013 | Micheweni | 18/3/2013 | MAKANGALE | 40108 | M | 12 | 3 |
| Pemba | 2013 | Micheweni | 18/3/2013 | MAKANGALE | 40109 | M | 9  | 3 |
| Pemba | 2013 | Micheweni | 18/3/2013 | MAKANGALE | 40110 | M | 12 | 3 |
| Pemba | 2013 | Micheweni | 18/3/2013 | MAKANGALE | 40111 | M | 11 | 3 |
| Pemba | 2013 | Micheweni | 18/3/2013 | MAKANGALE | 40112 | M | 12 | 3 |
| Pemba | 2013 | Micheweni | 18/3/2013 | MAKANGALE | 40113 | M | 12 | 3 |
| Pemba | 2013 | Micheweni | 18/3/2013 | MAKANGALE | 40114 | M | 11 | 3 |
| Pemba | 2013 | Micheweni | 18/3/2013 | MAKANGALE | 40115 | M | 12 | 3 |
| Pemba | 2013 | Micheweni | 18/3/2013 | MAKANGALE | 40116 | M | 12 | 3 |
| Pemba | 2013 | Micheweni | 18/3/2013 | MAKANGALE | 40117 | M | 12 | 3 |
| Pemba | 2013 | Micheweni | 18/3/2013 | MAKANGALE | 40118 | M | 12 | 3 |
| Pemba | 2013 | Micheweni | 18/3/2013 | MAKANGALE | 40119 | M | 11 | 3 |
| Pemba | 2013 | Micheweni | 18/3/2013 | MAKANGALE | 40120 | M | 9  | 3 |
| Pemba | 2013 | Micheweni | 18/3/2013 | MAKANGALE | 40121 | M | 9  | 3 |
| Pemba | 2013 | Micheweni | 18/3/2013 | MAKANGALE | 40122 | M | 12 | 3 |

|       |      |           |           |           |       |   |    |   |
|-------|------|-----------|-----------|-----------|-------|---|----|---|
| Pemba | 2013 | Micheweni | 18/3/2013 | MAKANGALE | 40123 | M | 12 | 3 |
| Pemba | 2013 | Micheweni | 18/3/2013 | MAKANGALE | 40124 | M | 9  | 3 |
| Pemba | 2013 | Micheweni | 18/3/2013 | MAKANGALE | 40125 | M | 12 | 3 |
| Pemba | 2013 | Micheweni | 18/3/2013 | MAKANGALE | 40126 | M | 12 | 3 |
| Pemba | 2013 | Micheweni | 18/3/2013 | MAKANGALE | 40127 | M | 10 | 3 |
| Pemba | 2013 | Micheweni | 18/3/2013 | MAKANGALE | 40128 | M | 11 | 3 |
| Pemba | 2013 | Micheweni | 18/3/2013 | MAKANGALE | 40129 | M | 10 | 3 |
| Pemba | 2013 | Micheweni | 18/3/2013 | MAKANGALE | 40130 | M | 10 | 3 |
| Pemba | 2013 | Micheweni | 13/3/2013 | KINOWE    | 44001 | F | 12 | 4 |
| Pemba | 2013 | Micheweni | 13/3/2013 | KINOWE    | 44002 | F | 10 | 4 |
| Pemba | 2013 | Micheweni | 13/3/2013 | KINOWE    | 44003 | F | 12 | 4 |
| Pemba | 2013 | Micheweni | 13/3/2013 | KINOWE    | 44004 | F | 10 | 4 |
| Pemba | 2013 | Micheweni | 13/3/2013 | KINOWE    | 44005 | F | 12 | 4 |
| Pemba | 2013 | Micheweni | 13/3/2013 | KINOWE    | 44006 | F | 12 | 4 |
| Pemba | 2013 | Micheweni | 13/3/2013 | KINOWE    | 44007 | F | 12 | 4 |
| Pemba | 2013 | Micheweni | 13/3/2013 | KINOWE    | 44008 | F | 9  | 4 |
| Pemba | 2013 | Micheweni | 13/3/2013 | KINOWE    | 44009 | F | 12 | 4 |
| Pemba | 2013 | Micheweni | 13/3/2013 | KINOWE    | 44010 | F | 11 | 4 |
| Pemba | 2013 | Micheweni | 13/3/2013 | KINOWE    | 44011 | F | 11 | 4 |
| Pemba | 2013 | Micheweni | 13/3/2013 | KINOWE    | 44012 | F | 12 | 4 |
| Pemba | 2013 | Micheweni | 13/3/2013 | KINOWE    | 44013 | F | 11 | 4 |
| Pemba | 2013 | Micheweni | 13/3/2013 | KINOWE    | 44014 | F | 11 | 4 |
| Pemba | 2013 | Micheweni | 13/3/2013 | KINOWE    | 44015 | F | 10 | 4 |
| Pemba | 2013 | Micheweni | 13/3/2013 | KINOWE    | 44016 | F | 12 | 4 |
| Pemba | 2013 | Micheweni | 13/3/2013 | KINOWE    | 44017 | F | 11 | 4 |
| Pemba | 2013 | Micheweni | 13/3/2013 | KINOWE    | 44018 | F | 10 | 4 |
| Pemba | 2013 | Micheweni | 13/3/2013 | KINOWE    | 44019 | F | 11 | 4 |
| Pemba | 2013 | Micheweni | 13/3/2013 | KINOWE    | 44020 | F | 10 | 4 |
| Pemba | 2013 | Micheweni | 13/3/2013 | KINOWE    | 44021 | F | 12 | 4 |
| Pemba | 2013 | Micheweni | 13/3/2013 | KINOWE    | 44022 | F | 12 | 4 |
| Pemba | 2013 | Micheweni | 13/3/2013 | KINOWE    | 44023 | F | 10 | 4 |
| Pemba | 2013 | Micheweni | 13/3/2013 | KINOWE    | 44024 | F | 10 | 4 |
| Pemba | 2013 | Micheweni | 13/3/2013 | KINOWE    | 44025 | F | 12 | 4 |
| Pemba | 2013 | Micheweni | 13/3/2013 | KINOWE    | 44026 | F | 11 | 4 |
| Pemba | 2013 | Micheweni | 13/3/2013 | KINOWE    | 44027 | F | 10 | 4 |
| Pemba | 2013 | Micheweni | 13/3/2013 | KINOWE    | 44028 | F | 12 | 4 |
| Pemba | 2013 | Micheweni | 13/3/2013 | KINOWE    | 44029 | F | 11 | 4 |
| Pemba | 2013 | Micheweni | 13/3/2013 | KINOWE    | 44030 | F | 10 | 4 |
| Pemba | 2013 | Micheweni | 13/3/2013 | KINOWE    | 44031 | F | 10 | 4 |
| Pemba | 2013 | Micheweni | 13/3/2013 | KINOWE    | 44032 | F | 11 | 4 |
| Pemba | 2013 | Micheweni | 13/3/2013 | KINOWE    | 44033 | F | 10 | 4 |
| Pemba | 2013 | Micheweni | 13/3/2013 | KINOWE    | 44034 | F | 10 | 4 |
| Pemba | 2013 | Micheweni | 13/3/2013 | KINOWE    | 44035 | F | 12 | 4 |
| Pemba | 2013 | Micheweni | 13/3/2013 | KINOWE    | 44036 | F | 11 | 4 |
| Pemba | 2013 | Micheweni | 13/3/2013 | KINOWE    | 44037 | F | 10 | 4 |
| Pemba | 2013 | Micheweni | 13/3/2013 | KINOWE    | 44038 | F | 11 | 4 |
| Pemba | 2013 | Micheweni | 13/3/2013 | KINOWE    | 44039 | F | 10 | 4 |
| Pemba | 2013 | Micheweni | 13/3/2013 | KINOWE    | 44040 | F | 11 | 4 |
| Pemba | 2013 | Micheweni | 13/3/2013 | KINOWE    | 44041 | F | 12 | 4 |
| Pemba | 2013 | Micheweni | 13/3/2013 | KINOWE    | 44042 | F | 11 | 4 |

|       |      |           |           |        |       |   |    |   |
|-------|------|-----------|-----------|--------|-------|---|----|---|
| Pemba | 2013 | Micheweni | 13/3/2013 | KINOWE | 44043 | F | 12 | 4 |
| Pemba | 2013 | Micheweni | 13/3/2013 | KINOWE | 44044 | F | 11 | 4 |
| Pemba | 2013 | Micheweni | 13/3/2013 | KINOWE | 44045 | F | 10 | 4 |
| Pemba | 2013 | Micheweni | 13/3/2013 | KINOWE | 44046 | F | 10 | 4 |
| Pemba | 2013 | Micheweni | 13/3/2013 | KINOWE | 44047 | F | 10 | 4 |
| Pemba | 2013 | Micheweni | 13/3/2013 | KINOWE | 44048 | F | 10 | 4 |
| Pemba | 2013 | Micheweni | 13/3/2013 | KINOWE | 44049 | F | 12 | 4 |
| Pemba | 2013 | Micheweni | 13/3/2013 | KINOWE | 44050 | F | 11 | 4 |
| Pemba | 2013 | Micheweni | 13/3/2013 | KINOWE | 44051 | M | 12 | 4 |
| Pemba | 2013 | Micheweni | 13/3/2013 | KINOWE | 44052 | M | 12 | 4 |
| Pemba | 2013 | Micheweni | 13/3/2013 | KINOWE | 44053 | M | 11 | 4 |
| Pemba | 2013 | Micheweni | 13/3/2013 | KINOWE | 44054 | M | 12 | 4 |
| Pemba | 2013 | Micheweni | 13/3/2013 | KINOWE | 44055 | M | 12 | 4 |
| Pemba | 2013 | Micheweni | 13/3/2013 | KINOWE | 44056 | M | 12 | 4 |
| Pemba | 2013 | Micheweni | 13/3/2013 | KINOWE | 44057 | M | 12 | 4 |
| Pemba | 2013 | Micheweni | 13/3/2013 | KINOWE | 44058 | M | 12 | 4 |
| Pemba | 2013 | Micheweni | 13/3/2013 | KINOWE | 44059 | M | 12 | 4 |
| Pemba | 2013 | Micheweni | 13/3/2013 | KINOWE | 44060 | M | 12 | 4 |
| Pemba | 2013 | Micheweni | 13/3/2013 | KINOWE | 44061 | M | 12 | 4 |
| Pemba | 2013 | Micheweni | 13/3/2013 | KINOWE | 44062 | M | 11 | 4 |
| Pemba | 2013 | Micheweni | 13/3/2013 | KINOWE | 44063 | M | 11 | 4 |
| Pemba | 2013 | Micheweni | 13/3/2013 | KINOWE | 44064 | M | 9  | 4 |
| Pemba | 2013 | Micheweni | 13/3/2013 | KINOWE | 44065 | M | 12 | 4 |
| Pemba | 2013 | Micheweni | 13/3/2013 | KINOWE | 44066 | M | 11 | 4 |
| Pemba | 2013 | Micheweni | 13/3/2013 | KINOWE | 44067 | M | 12 | 4 |
| Pemba | 2013 | Micheweni | 13/3/2013 | KINOWE | 44068 | M | 12 | 4 |
| Pemba | 2013 | Micheweni | 13/3/2013 | KINOWE | 44069 | M | 12 | 4 |
| Pemba | 2013 | Micheweni | 13/3/2013 | KINOWE | 44070 | M | 10 | 4 |
| Pemba | 2013 | Micheweni | 13/3/2013 | KINOWE | 44071 | M | 12 | 4 |
| Pemba | 2013 | Micheweni | 13/3/2013 | KINOWE | 44072 | M | 10 | 4 |
| Pemba | 2013 | Micheweni | 13/3/2013 | KINOWE | 44073 | M | 11 | 4 |
| Pemba | 2013 | Micheweni | 13/3/2013 | KINOWE | 44074 | M | 12 | 4 |
| Pemba | 2013 | Micheweni | 13/3/2013 | KINOWE | 44075 | M | 12 | 4 |
| Pemba | 2013 | Micheweni | 13/3/2013 | KINOWE | 44076 | M | 12 | 4 |
| Pemba | 2013 | Micheweni | 13/3/2013 | KINOWE | 44077 | M | 12 | 4 |
| Pemba | 2013 | Micheweni | 13/3/2013 | KINOWE | 44078 | M | 10 | 4 |
| Pemba | 2013 | Micheweni | 13/3/2013 | KINOWE | 44079 | M | 11 | 4 |
| Pemba | 2013 | Micheweni | 13/3/2013 | KINOWE | 44080 | M | 11 | 4 |
| Pemba | 2013 | Micheweni | 13/3/2013 | KINOWE | 44081 | M | 10 | 4 |
| Pemba | 2013 | Micheweni | 13/3/2013 | KINOWE | 44082 | M | 12 | 4 |
| Pemba | 2013 | Micheweni | 13/3/2013 | KINOWE | 44083 | M | 10 | 4 |
| Pemba | 2013 | Micheweni | 13/3/2013 | KINOWE | 44084 | M | 11 | 4 |
| Pemba | 2013 | Micheweni | 13/3/2013 | KINOWE | 44085 | M | 11 | 4 |
| Pemba | 2013 | Micheweni | 13/3/2013 | KINOWE | 44086 | M | 11 | 4 |
| Pemba | 2013 | Micheweni | 13/3/2013 | KINOWE | 44087 | M | 11 | 4 |
| Pemba | 2013 | Micheweni | 13/3/2013 | KINOWE | 44088 | M | 11 | 4 |
| Pemba | 2013 | Micheweni | 13/3/2013 | KINOWE | 44089 | M | 12 | 4 |
| Pemba | 2013 | Micheweni | 13/3/2013 | KINOWE | 44090 | M | 12 | 4 |
| Pemba | 2013 | Micheweni | 13/3/2013 | KINOWE | 44091 | M | 12 | 4 |
| Pemba | 2013 | Micheweni | 13/3/2013 | KINOWE | 44092 | M | 11 | 4 |

|       |      |           |           |         |       |   |    |   |
|-------|------|-----------|-----------|---------|-------|---|----|---|
| Pemba | 2013 | Micheweni | 13/3/2013 | KINOWE  | 44093 | M | 10 | 4 |
| Pemba | 2013 | Micheweni | 13/3/2013 | KINOWE  | 44094 | M | 12 | 4 |
| Pemba | 2013 | Micheweni | 13/3/2013 | KINOWE  | 44095 | M | 12 | 4 |
| Pemba | 2013 | Micheweni | 13/3/2013 | KINOWE  | 44096 | M | 12 | 4 |
| Pemba | 2013 | Micheweni | 13/3/2013 | KINOWE  | 44097 | M | 11 | 4 |
| Pemba | 2013 | Micheweni | 13/3/2013 | KINOWE  | 44098 | M | 11 | 4 |
| Pemba | 2013 | Micheweni | 13/3/2013 | KINOWE  | 44099 | M | 12 | 4 |
| Pemba | 2013 | Micheweni | 13/3/2013 | KINOWE  | 44100 | M | 11 | 4 |
| Pemba | 2013 | Micheweni | 13/3/2013 | KINOWE  | 44101 | F | 10 | 3 |
| Pemba | 2013 | Micheweni | 13/3/2013 | KINOWE  | 44102 | F | 9  | 3 |
| Pemba | 2013 | Micheweni | 13/3/2013 | KINOWE  | 44103 | F | 10 | 3 |
| Pemba | 2013 | Micheweni | 13/3/2013 | KINOWE  | 44104 | F | 12 | 3 |
| Pemba | 2013 | Micheweni | 13/3/2013 | KINOWE  | 44105 | F | 11 | 3 |
| Pemba | 2013 | Micheweni | 13/3/2013 | KINOWE  | 44106 | F | 12 | 3 |
| Pemba | 2013 | Micheweni | 13/3/2013 | KINOWE  | 44107 | F | 10 | 3 |
| Pemba | 2013 | Micheweni | 13/3/2013 | KINOWE  | 44108 | F | 11 | 3 |
| Pemba | 2013 | Micheweni | 13/3/2013 | KINOWE  | 44109 | F | 12 | 3 |
| Pemba | 2013 | Micheweni | 13/3/2013 | KINOWE  | 44110 | F | 10 | 3 |
| Pemba | 2013 | Micheweni | 13/3/2013 | KINOWE  | 44111 | F | 10 | 3 |
| Pemba | 2013 | Micheweni | 13/3/2013 | KINOWE  | 44112 | F | 12 | 3 |
| Pemba | 2013 | Micheweni | 13/3/2013 | KINOWE  | 44113 | F | 10 | 3 |
| Pemba | 2013 | Micheweni | 13/3/2013 | KINOWE  | 44114 | F | 10 | 3 |
| Pemba | 2013 | Micheweni | 13/3/2013 | KINOWE  | 44115 | F | 10 | 3 |
| Pemba | 2013 | Micheweni | 13/3/2013 | KINOWE  | 44116 | M | 9  | 3 |
| Pemba | 2013 | Micheweni | 13/3/2013 | KINOWE  | 44117 | M | 12 | 3 |
| Pemba | 2013 | Micheweni | 13/3/2013 | KINOWE  | 44118 | M | 9  | 3 |
| Pemba | 2013 | Micheweni | 13/3/2013 | KINOWE  | 44119 | M | 9  | 3 |
| Pemba | 2013 | Micheweni | 13/3/2013 | KINOWE  | 44120 | M | 10 | 3 |
| Pemba | 2013 | Micheweni | 13/3/2013 | KINOWE  | 44121 | M | 12 | 3 |
| Pemba | 2013 | Micheweni | 13/3/2013 | KINOWE  | 44122 | M | 10 | 3 |
| Pemba | 2013 | Micheweni | 13/3/2013 | KINOWE  | 44123 | M | 10 | 3 |
| Pemba | 2013 | Micheweni | 13/3/2013 | KINOWE  | 44124 | M | 12 | 3 |
| Pemba | 2013 | Micheweni | 13/3/2013 | KINOWE  | 44125 | M | 10 | 3 |
| Pemba | 2013 | Micheweni | 13/3/2013 | KINOWE  | 44126 | M | 10 | 3 |
| Pemba | 2013 | Micheweni | 13/3/2013 | KINOWE  | 44127 | M | 12 | 3 |
| Pemba | 2013 | Micheweni | 13/3/2013 | KINOWE  | 44128 | M | 11 | 3 |
| Pemba | 2013 | Micheweni | 13/3/2013 | KINOWE  | 44129 | M | 9  | 3 |
| Pemba | 2013 | Micheweni | 13/3/2013 | KINOWE  | 44130 | M | 12 | 3 |
| Pemba | 2013 | Micheweni | 14/3/2013 | KONDE A | 45001 | M | 11 | 4 |
| Pemba | 2013 | Micheweni | 14/3/2013 | KONDE A | 45002 | F | 11 | 4 |
| Pemba | 2013 | Micheweni | 14/3/2013 | KONDE A | 45003 | F | 10 | 4 |
| Pemba | 2013 | Micheweni | 14/3/2013 | KONDE A | 45004 | F | 10 | 4 |
| Pemba | 2013 | Micheweni | 14/3/2013 | KONDE A | 45005 | F | 12 | 4 |
| Pemba | 2013 | Micheweni | 14/3/2013 | KONDE A | 45006 | F | 11 | 4 |
| Pemba | 2013 | Micheweni | 14/3/2013 | KONDE A | 45007 | F | 10 | 4 |
| Pemba | 2013 | Micheweni | 14/3/2013 | KONDE A | 45008 | F | 11 | 4 |
| Pemba | 2013 | Micheweni | 14/3/2013 | KONDE A | 45009 | F | 10 | 4 |
| Pemba | 2013 | Micheweni | 14/3/2013 | KONDE A | 45010 | F | 10 | 4 |
| Pemba | 2013 | Micheweni | 14/3/2013 | KONDE A | 45011 | F | 10 | 4 |
| Pemba | 2013 | Micheweni | 14/3/2013 | KONDE A | 45012 | F | 11 | 4 |





|       |      |           |           |         |       |   |    |   |
|-------|------|-----------|-----------|---------|-------|---|----|---|
| Pemba | 2013 | Micheweni | 14/3/2013 | KONDE A | 45063 | M | 11 | 4 |
| Pemba | 2013 | Micheweni | 14/3/2013 | KONDE A | 45064 | M | 11 | 4 |
| Pemba | 2013 | Micheweni | 14/3/2013 | KONDE A | 45065 | M | 9  | 4 |
| Pemba | 2013 | Micheweni | 14/3/2013 | KONDE A | 45066 | M | 10 | 4 |
| Pemba | 2013 | Micheweni | 14/3/2013 | KONDE A | 45067 | M | 10 | 4 |
| Pemba | 2013 | Micheweni | 14/3/2013 | KONDE A | 45068 | M | 10 | 4 |
| Pemba | 2013 | Micheweni | 14/3/2013 | KONDE A | 45069 | M | 10 | 4 |
| Pemba | 2013 | Micheweni | 14/3/2013 | KONDE A | 45070 | F | 11 | 4 |
| Pemba | 2013 | Micheweni | 14/3/2013 | KONDE A | 45071 | F | 11 | 4 |
| Pemba | 2013 | Micheweni | 14/3/2013 | KONDE A | 45072 | F | 10 | 4 |
| Pemba | 2013 | Micheweni | 14/3/2013 | KONDE A | 45073 | F | 10 | 4 |
| Pemba | 2013 | Micheweni | 14/3/2013 | KONDE A | 45074 | F | 9  | 4 |
| Pemba | 2013 | Micheweni | 14/3/2013 | KONDE A | 45075 | F | 10 | 4 |
| Pemba | 2013 | Micheweni | 14/3/2013 | KONDE A | 45076 | F | 12 | 4 |
| Pemba | 2013 | Micheweni | 14/3/2013 | KONDE A | 45077 | F | 11 | 4 |
| Pemba | 2013 | Micheweni | 14/3/2013 | KONDE A | 45078 | F | 10 | 4 |
| Pemba | 2013 | Micheweni | 14/3/2013 | KONDE A | 45079 | F | 11 | 4 |
| Pemba | 2013 | Micheweni | 14/3/2013 | KONDE A | 45080 | F | 9  | 4 |
| Pemba | 2013 | Micheweni | 14/3/2013 | KONDE A | 45081 | F | 10 | 4 |
| Pemba | 2013 | Micheweni | 14/3/2013 | KONDE A | 45082 | F | 11 | 4 |
| Pemba | 2013 | Micheweni | 14/3/2013 | KONDE A | 45083 | F | 12 | 4 |
| Pemba | 2013 | Micheweni | 14/3/2013 | KONDE A | 45084 | F | 10 | 4 |
| Pemba | 2013 | Micheweni | 14/3/2013 | KONDE A | 45085 | F | 10 | 4 |
| Pemba | 2013 | Micheweni | 14/3/2013 | KONDE A | 45086 | F | 10 | 4 |
| Pemba | 2013 | Micheweni | 14/3/2013 | KONDE A | 45087 | F | 11 | 4 |
| Pemba | 2013 | Micheweni | 14/3/2013 | KONDE A | 45088 | F | 10 | 4 |
| Pemba | 2013 | Micheweni | 14/3/2013 | KONDE A | 45089 | F | 10 | 4 |
| Pemba | 2013 | Micheweni | 14/3/2013 | KONDE A | 45090 | F | 11 | 4 |
| Pemba | 2013 | Micheweni | 14/3/2013 | KONDE A | 45091 | F | 10 | 4 |
| Pemba | 2013 | Micheweni | 14/3/2013 | KONDE A | 45092 | F | 10 | 4 |
| Pemba | 2013 | Micheweni | 14/3/2013 | KONDE A | 45093 | F | 11 | 4 |
| Pemba | 2013 | Micheweni | 14/3/2013 | KONDE A | 45094 | F | 11 | 4 |
| Pemba | 2013 | Micheweni | 14/3/2013 | KONDE A | 45095 | F | 10 | 4 |
| Pemba | 2013 | Micheweni | 14/3/2013 | KONDE A | 45096 | F | 10 | 4 |
| Pemba | 2013 | Micheweni | 14/3/2013 | KONDE A | 45097 | F | 11 | 4 |
| Pemba | 2013 | Micheweni | 14/3/2013 | KONDE A | 45098 | F | 10 | 4 |
| Pemba | 2013 | Micheweni | 14/3/2013 | KONDE A | 45099 | F | 10 | 4 |
| Pemba | 2013 | Micheweni | 14/3/2013 | KONDE A | 45100 | F | 11 | 4 |
| Pemba | 2013 | Micheweni | 14/3/2013 | KONDE A | 45101 | F | 11 | 3 |
| Pemba | 2013 | Micheweni | 14/3/2013 | KONDE A | 45102 | F | 11 | 3 |
| Pemba | 2013 | Micheweni | 14/3/2013 | KONDE A | 45103 | F | 12 | 3 |
| Pemba | 2013 | Micheweni | 14/3/2013 | KONDE A | 45104 | F | 11 | 3 |
| Pemba | 2013 | Micheweni | 14/3/2013 | KONDE A | 45105 | F | 9  | 3 |
| Pemba | 2013 | Micheweni | 14/3/2013 | KONDE A | 45106 | F | 11 | 3 |
| Pemba | 2013 | Micheweni | 14/3/2013 | KONDE A | 45107 | F | 10 | 3 |
| Pemba | 2013 | Micheweni | 14/3/2013 | KONDE A | 45108 | F | 12 | 3 |
| Pemba | 2013 | Micheweni | 14/3/2013 | KONDE A | 45109 | F | 10 | 3 |
| Pemba | 2013 | Micheweni | 14/3/2013 | KONDE A | 45110 | F | 9  | 3 |
| Pemba | 2013 | Micheweni | 14/3/2013 | KONDE A | 45111 | F | 11 | 3 |
| Pemba | 2013 | Micheweni | 14/3/2013 | KONDE A | 45112 | F | 9  | 3 |

|       |      |           |           |         |       |   |    |   |
|-------|------|-----------|-----------|---------|-------|---|----|---|
| Pemba | 2013 | Micheweni | 14/3/2013 | KONDE A | 45113 | F | 11 | 3 |
| Pemba | 2013 | Micheweni | 14/3/2013 | KONDE A | 45114 | F | 11 | 3 |
| Pemba | 2013 | Micheweni | 14/3/2013 | KONDE A | 45115 | F | 11 | 3 |
| Pemba | 2013 | Micheweni | 14/3/2013 | KONDE A | 45116 | M | 11 | 3 |
| Pemba | 2013 | Micheweni | 14/3/2013 | KONDE A | 45117 | M | 10 | 3 |
| Pemba | 2013 | Micheweni | 14/3/2013 | KONDE A | 45118 | M | 9  | 3 |
| Pemba | 2013 | Micheweni | 14/3/2013 | KONDE A | 45119 | M | 10 | 3 |
| Pemba | 2013 | Micheweni | 14/3/2013 | KONDE A | 45120 | M | 11 | 3 |
| Pemba | 2013 | Micheweni | 14/3/2013 | KONDE A | 45121 | M | 11 | 3 |
| Pemba | 2013 | Micheweni | 14/3/2013 | KONDE A | 45122 | M | 9  | 3 |
| Pemba | 2013 | Micheweni | 14/3/2013 | KONDE A | 45123 | M | 12 | 3 |
| Pemba | 2013 | Micheweni | 14/3/2013 | KONDE A | 45124 | M | 11 | 3 |
| Pemba | 2013 | Micheweni | 14/3/2013 | KONDE A | 45125 | M | 10 | 3 |
| Pemba | 2013 | Micheweni | 14/3/2013 | KONDE A | 45126 | M | 10 | 3 |
| Pemba | 2013 | Micheweni | 14/3/2013 | KONDE A | 45127 | M | 10 | 3 |
| Pemba | 2013 | Micheweni | 14/3/2013 | KONDE A | 45128 | M | 10 | 3 |
| Pemba | 2013 | Micheweni | 14/3/2013 | KONDE A | 45129 | M | 10 | 3 |
| Pemba | 2013 | Micheweni | 14/3/2013 | KONDE A | 45130 | M | 11 | 3 |











|   |              |              |    |
|---|--------------|--------------|----|
| 1 | 0 04/03/2013 | 0 04/03/2013 |    |
| 1 | 0 04/03/2013 | 0 04/03/2013 |    |
| 1 | 0 04/03/2013 | 0 04/03/2013 |    |
| 1 | 0 04/03/2013 | 0 04/03/2013 |    |
| 1 | 0 04/03/2013 | 0 04/03/2013 |    |
| 1 | 0 04/03/2013 | 0 04/03/2013 |    |
| 1 | 0 04/03/2013 | 0 04/03/2013 |    |
| 1 | 0 04/03/2013 | 0 04/03/2013 |    |
| 1 | 0 04/03/2013 | 0 04/03/2013 |    |
| 1 | 0 04/03/2013 | 0 04/03/2013 |    |
| 1 | 0 04/03/2013 | 0 04/03/2013 |    |
| 1 | 0 04/03/2013 | 0 04/03/2013 |    |
| 1 | 0 04/03/2013 | 0 04/03/2013 |    |
| 1 | 0 04/03/2013 | 0 04/03/2013 |    |
| 1 | 2 22/4/2013  | 32 22/4/2013 | 35 |
| 1 | 0 22/4/2013  | 0 22/4/2013  | 0  |
| 1 | 2 22/4/2013  | 0 22/4/2013  | 0  |
| 0 | 22/4/2013    |              |    |
| 1 | 2 22/4/2013  | 0 22/4/2013  | 0  |
| 1 | 0 22/4/2013  | 0 22/4/2013  | 0  |
| 1 | 0 22/4/2013  | 0 22/4/2013  | 0  |
| 1 | 0 22/4/2013  | 0 22/4/2013  | 0  |
| 1 | 0 22/4/2013  | 0 22/4/2013  | 0  |
| 1 | 0 22/4/2013  | 0 22/4/2013  | 0  |
| 1 | 0 22/4/2013  | 0 22/4/2013  | 0  |
| 1 | 0 22/4/2013  | 0 22/4/2013  | 0  |
| 1 | 0 22/4/2013  | 0 22/4/2013  | 0  |
| 1 | 0 22/4/2013  | 0 22/4/2013  | 0  |
| 1 | 0 22/4/2013  | 0 22/4/2013  | 0  |
| 0 | 22/4/2013    |              |    |
| 0 | 22/4/2013    |              |    |
| 1 | 0 22/4/2013  | 0 22/4/2013  | 0  |
| 0 | 22/4/2013    |              |    |
| 1 | 0 22/4/2013  | 0 22/4/2013  | 0  |
| 0 | 22/4/2013    |              |    |
| 1 | 0 22/4/2013  | 0 22/4/2013  | 0  |
| 1 | 0 22/4/2013  | 0 22/4/2013  | 0  |
| 1 | 0 22/4/2013  | 0 22/4/2013  | 0  |
| 1 | 0 22/4/2013  | 0 22/4/2013  | 0  |
| 1 | 0 22/4/2013  | 0 22/4/2013  | 0  |
| 1 | 0 22/4/2013  | 0 22/4/2013  | 0  |
| 0 | 22/4/2013    |              |    |
| 1 | 0 22/4/2013  | 0 22/4/2013  | 0  |
| 1 | 0 22/4/2013  | 0 22/4/2013  | 0  |
| 1 | 4 22/4/2013  | 0 22/4/2013  | 2  |
| 1 | 0 22/4/2013  | 0 22/4/2013  | 0  |
| 1 | 0 22/4/2013  | 0 22/4/2013  | 0  |
| 1 | 0 22/4/2013  | 0 22/4/2013  | 0  |
| 0 | 22/4/2013    |              |    |
| 1 | 0 22/4/2013  | 0 22/4/2013  | 0  |
| 1 | 0 22/4/2013  | 0 22/4/2013  | 0  |
| 1 | 0 22/4/2013  | 0 22/4/2013  | 0  |
| 0 | 22/4/2013    |              |    |



|   |   |           |     |           |         |
|---|---|-----------|-----|-----------|---------|
| 1 | 0 | 22/4/2013 | 0   | 22/4/2013 | 0       |
| 0 |   | 22/4/2013 |     |           |         |
| 1 | 0 | 22/4/2013 | 0   | 22/4/2013 | 0       |
| 0 |   | 22/4/2013 |     |           |         |
| 1 | 0 | 22/4/2013 | 0   | 22/4/2013 | 0       |
| 0 |   | 22/4/2013 |     |           |         |
| 1 | 0 | 22/4/2013 | 0   | 22/4/2013 | 0       |
| 1 | 0 | 22/4/2013 | 0   | 22/4/2013 | 0       |
| 0 |   | 22/4/2013 |     |           |         |
| 1 | 2 | 22/4/2013 | 0   | 22/4/2013 | 2       |
| 1 |   | 22/4/2013 |     |           |         |
| 1 | 0 | 22/4/2013 | 0   | 22/4/2013 | 0       |
| 1 | 0 | 22/4/2013 | 0   | 22/4/2013 | 0       |
| 1 | 0 | 22/4/2013 | 0   | 22/4/2013 | 0       |
| 1 | 0 | 22/4/2013 | 0   | 22/4/2013 | 0       |
| 1 | 0 | 22/4/2013 | 0   | 22/4/2013 | 0       |
| 0 |   | 22/4/2013 |     |           |         |
| 1 | 0 | 22/4/2013 | 0   | 22/4/2013 | 0       |
| 0 |   | 22/4/2013 |     |           |         |
| 1 | 0 | 22/4/2013 | 0   | 22/4/2013 | 0       |
| 0 |   | 22/4/2013 |     |           |         |
| 0 |   | 22/4/2013 |     |           |         |
| 1 | 0 | 22/4/2013 | 0   | 22/4/2013 | 0       |
| 1 | 0 | 22/4/2013 | 0   | 22/4/2013 | 0       |
| 0 |   | 22/4/2013 |     |           |         |
| 1 | 3 | 22/4/2013 | 110 | 22/4/2013 | 8       |
| 1 | 0 | 22/4/2013 | 0   | 22/4/2013 | 0       |
| 1 | 0 | 22/4/2013 | 0   | 22/4/2013 | 0       |
| 1 | 0 | 22/4/2013 | 0   | 22/4/2013 | 0       |
| 1 | 0 | 22/4/2013 | 0   | 22/4/2013 | MISSING |
| 1 | 0 | 22/4/2013 | 0   | 22/4/2013 | 0       |
| 1 | 0 | 22/4/2013 | 0   | 22/4/2013 | 0       |
| 1 | 0 | 22/4/2013 | 0   | 22/4/2013 | 0       |
| 1 | 0 | 22/4/2013 | 0   | 22/4/2013 | 0       |
| 1 | 0 | 22/4/2013 | 0   | 22/4/2013 | 0       |
| 1 | 0 | 22/4/2013 | 0   | 22/4/2013 | 0       |
| 1 | 0 | 22/4/2013 | 0   | 22/4/2013 | 0       |
| 1 | 0 | 22/4/2013 | 0   | 22/4/2013 | 0       |
| 1 | 0 | 22/4/2013 | 0   | 22/4/2013 | 0       |
| 1 | 0 | 22/4/2013 | 0   | 22/4/2013 | 0       |
| 1 | 0 | 22/4/2013 | 0   | 22/4/2013 | 0       |
| 1 | 0 | 22/4/2013 | 0   | 22/4/2013 | 0       |
| 0 |   | 22/4/2013 |     |           |         |
| 0 |   | 22/4/2013 |     |           |         |
| 0 |   | 22/4/2013 |     |           |         |
| 1 | 0 | 22/4/2013 | 0   | 22/4/2013 | 0       |



|   |             |               |     |
|---|-------------|---------------|-----|
| 1 | 1 25/4/2013 | 0 25/4/2013   | 0   |
| 1 | 0 25/4/2013 | 0 25/4/2013   | 0   |
| 1 | 0 25/4/2013 | 0 25/4/2013   | 0   |
| 1 | 0 25/4/2013 | 0 25/4/2013   | 0   |
| 0 | 25/4/2013   |               |     |
| 1 | 0 25/4/2013 | 0 25/4/2013   | 0   |
| 1 | 0 25/4/2013 | 0 25/4/2013   | 0   |
| 1 | 0 25/4/2013 | 0 25/4/2013   | 0   |
| 1 | 0 25/4/2013 | 0 25/4/2013   | 0   |
| 1 | 0 25/4/2013 | 0 25/4/2013   | 0   |
| 1 | 0 25/4/2013 | 0 25/4/2013   | 0   |
| 1 | 0 25/4/2013 | 0 25/4/2013   | 0   |
| 1 | 0 25/4/2013 | 0 25/4/2013   | 0   |
| 1 | 0 25/4/2013 | 0 25/4/2013   | 0   |
| 0 | 25/4/2013   |               |     |
| 1 | 0 25/4/2013 | 0 25/4/2013   | 0   |
| 1 | 0 25/4/2013 | 0 25/4/2013   | 0   |
| 1 | 25/4/2013   |               |     |
| 1 | 0 25/4/2013 | 0 25/4/2013   | 0   |
| 1 | 0 25/4/2013 | 0 25/4/2013   | 0   |
| 1 | 0 25/4/2013 | 0 25/4/2013   | 0   |
| 1 | 1 25/4/2013 | 23 25/4/2013  | 30  |
| 0 | 25/4/2013   |               |     |
| 1 | 0 25/4/2013 | 0 25/4/2013   | 0   |
| 1 | 0 25/4/2013 | 0 25/4/2013   | 0   |
| 1 | 0 25/4/2013 | 0 25/4/2013   | 0   |
| 1 | 0 25/4/2013 | 0 25/4/2013   | 0   |
| 1 | 0 25/4/2013 | 0 25/4/2013   | 0   |
| 1 | 0 25/4/2013 | 0 25/4/2013   | 0   |
| 1 | 0 25/4/2013 | 0 25/4/2013   | 0   |
| 1 | 0 25/4/2013 | 0 25/4/2013   | 0   |
| 1 | 0 25/4/2013 | 0 25/4/2013   | 0   |
| 0 | 0 25/4/2013 | 0 25/4/2013   | 0   |
| 1 | 25/4/2013   |               |     |
| 1 | 0 25/4/2013 | 0 25/4/2013   | 0   |
| 1 | 3 25/4/2013 | 150 25/4/2013 | 138 |
| 1 | 0 25/4/2013 | 0 25/4/2013   | 0   |
| 1 | 0 25/4/2013 | 0 25/4/2013   | 0   |
| 1 | 0 25/4/2013 | 0 25/4/2013   | 0   |
| 1 | 3 25/4/2013 | 112 25/4/2013 | 4   |
| 1 | 0 25/4/2013 | 0 25/4/2013   | 0   |
| 1 | 0 25/4/2013 | 0 25/4/2013   | 0   |
| 1 | 0 25/4/2013 | 0 25/4/2013   | 0   |
| 1 | 0 25/4/2013 | 0 25/4/2013   | 0   |
| 1 | 0 25/4/2013 | 0 25/4/2013   | 0   |
| 0 | 25/4/2013   |               |     |
| 1 | 3 25/4/2013 | 4 25/4/2013   | 5   |
| 1 | 0 25/4/2013 | 0 25/4/2013   | 0   |
| 1 | 0 25/4/2013 | 0 25/4/2013   | 0   |
| 1 | 25/4/2013   |               |     |
| 1 | 0 25/4/2013 | 0 25/4/2013   | 0   |

|   |             |               |     |
|---|-------------|---------------|-----|
| 1 | 0 25/4/2013 | 0 25/4/2013   | 0   |
| 1 | 0 25/4/2013 | 0 25/4/2013   | 0   |
| 1 | 0 25/4/2013 | 0 25/4/2013   | 0   |
| 1 | 0 25/4/2013 | 0 25/4/2013   | 0   |
| 1 | 0 25/4/2013 | 0 25/4/2013   | 0   |
| 1 | 0 25/4/2013 | 0 25/4/2013   | 0   |
| 1 | 3 25/4/2013 | 101 25/4/2013 | 85  |
| 1 | 0 25/4/2013 | 0 25/4/2013   | 0   |
| 1 | 3 25/4/2013 | 112 25/4/2013 | 139 |
| 0 | 25/4/2013   |               |     |
| 1 | 0 25/4/2013 | 0 25/4/2013   | 0   |
| 0 | 25/4/2013   |               |     |
| 1 | 0 25/4/2013 | 0 25/4/2013   | 0   |
| 1 | 0 25/4/2013 | 0 25/4/2013   | 0   |
| 0 | 25/4/2013   |               |     |
| 1 | 25/4/2013   |               |     |
| 1 | 0 25/4/2013 | 0 25/4/2013   | 0   |
| 0 | 25/4/2013   |               |     |
| 1 | 0 25/4/2013 | 0 25/4/2013   | 0   |
| 1 | 0 25/4/2013 | 0 25/4/2013   | 0   |
| 0 | 25/4/2013   |               |     |
| 1 | 0 25/4/2013 | 0 25/4/2013   | 0   |
| 1 | 0 25/4/2013 | 14 25/4/2013  | 34  |
| 1 | 4 25/4/2013 | 0 25/4/2013   | 0   |
| 1 | 0 25/4/2013 | 0 25/4/2013   | 0   |
| 1 | 0 25/4/2013 | 0 25/4/2013   | 0   |
| 0 | 25/4/2013   |               |     |
| 1 | 0 25/4/2013 | 0 25/4/2013   | 0   |
| 1 | 3 25/4/2013 | 0 25/4/2013   | 0   |
| 1 | 0 25/4/2013 | 0 25/4/2013   | 0   |
| 1 | 0 25/4/2013 | 0 25/4/2013   | 0   |
| 1 | 0 25/4/2013 | 0 25/4/2013   | 0   |
| 1 | 0 25/4/2013 | 0 25/4/2013   | 0   |
| 1 | 0 25/4/2013 | 0 25/4/2013   | 0   |
| 1 | 0 25/4/2013 | 0 25/4/2013   | 0   |
| 1 | 0 25/4/2013 | 0 25/4/2013   | 0   |
| 1 | 0 25/4/2013 | 0 25/4/2013   | 0   |
| 0 | 25/4/2013   |               |     |
| 1 | 0 25/4/2013 | 0 25/4/2013   | 0   |
| 1 | 0 25/4/2013 | 0 25/4/2013   | 0   |
| 1 | 0 25/4/2013 | 0 25/4/2013   | 0   |
| 1 | 0 25/4/2013 | 0 25/4/2013   | 0   |
| 1 | 0 25/4/2013 | 0 25/4/2013   | 0   |
| 1 | 1 25/4/2013 | 23 25/4/2013  | 32  |
| 0 | 25/4/2013   |               |     |
| 1 | 0 25/4/2013 | 0 25/4/2013   |     |
| 1 | 0 25/4/2013 | 0 25/4/2013   |     |
| 1 | 0 25/4/2013 | 0 25/4/2013   |     |
| 1 | 0 25/4/2013 | 0 25/4/2013   |     |
| 1 | 0 25/4/2013 | 0 25/4/2013   |     |
| 0 | 25/4/2013   |               |     |
| 1 | 0 25/4/2013 | 0 25/4/2013   |     |



|   |             |             |         |
|---|-------------|-------------|---------|
| 1 | 0 27/2/2013 | 0 28/2/2013 | 0       |
| 1 | 0 27/2/2013 | 0 28/2/2013 | 0       |
| 1 | 0 27/2/2013 | 0 28/2/2013 | 0       |
| 1 | 0 27/2/2013 | 0 28/2/2013 | 0       |
| 0 | 27/2/2013   |             |         |
| 1 | 0 27/2/2013 | 0 28/2/2013 | 0       |
| 0 | 27/2/2013   |             |         |
| 1 | 0 27/2/2013 | 0 28/2/2013 | 0       |
| 1 | 0 27/2/2013 | 0 28/2/2013 | 0       |
| 1 | 0 27/2/2013 | 0 28/2/2013 | 0       |
| 1 | 0 27/2/2013 | 0 28/2/2013 | 0       |
| 1 | 0 27/2/2013 | 0 28/2/2013 | 0       |
| 1 | 0 27/2/2013 | 0 28/2/2013 | 0       |
| 1 | 0 27/2/2013 | 0 28/2/2013 | 0       |
| 0 | 27/2/2013   |             |         |
| 1 | 0 27/2/2013 | 0 28/2/2013 | 0       |
| 1 | 0 27/2/2013 | 0 28/2/2013 | 0       |
| 1 | 0 27/2/2013 | 0 28/2/2013 | 0       |
| 1 | 0 27/2/2013 | 0 28/2/2013 | 0       |
| 1 | 0 27/2/2013 | 0 28/2/2013 | 2       |
| 1 | 0 27/2/2013 | 0 28/2/2013 | 0       |
| 0 | 27/2/2013   |             |         |
| 0 | 27/2/2013   |             |         |
| 1 | 0 27/2/2013 | 0 28/2/2013 | 0       |
| 1 | 0 27/2/2013 | 0 28/2/2013 | 0       |
| 0 | 27/2/2013   |             |         |
| 1 | 0 27/2/2013 | 0 28/2/2013 | 0       |
| 1 | 0 27/2/2013 | 0 28/2/2013 | 0       |
| 1 | 0 27/2/2013 | 0 28/2/2013 | 0       |
| 1 | 0 27/2/2013 | 0 28/2/2013 | 0       |
| 1 | 0 27/2/2013 | 0 28/2/2013 | 0       |
| 1 | 0 27/2/2013 | 0 28/2/2013 | 0       |
| 1 | 0 27/2/2013 | 0 28/2/2013 | 0       |
| 1 | 0 27/2/2013 | 0 28/2/2013 | 0       |
| 1 | 0 27/2/2013 | 0 28/2/2013 | 0       |
| 0 | 27/2/2013   |             |         |
| 1 | 0 27/2/2013 | 0 28/2/2013 | 0       |
| 0 | 27/2/2013   |             |         |
| 1 | 0 27/2/2013 | 0 28/2/2013 | 0       |
| 1 | 0 27/2/2013 | 0 28/2/2013 | 0       |
| 1 | 0 27/2/2013 | 0 28/2/2013 | 0       |
| 1 | 0 27/2/2013 | 0 28/2/2013 | 0       |
| 1 | 0 27/2/2013 | 0 28/2/2013 | 0       |
| 0 | 27/2/2013   |             |         |
| 1 | 0 27/2/2013 | 0 28/2/2013 | MISSING |
| 1 | 0 27/2/2013 | 0 28/2/2013 | 0       |
| 1 | 0 27/2/2013 | 0 28/2/2013 | 0       |
| 1 | 0 27/2/2013 | 0 28/2/2013 | 0       |
| 1 | 0 27/2/2013 | 0 28/2/2013 | 0       |
| 1 | 0 27/2/2013 | 8 28/2/2013 | 10      |









|   |             |                |
|---|-------------|----------------|
| 1 | 0 28/3/2013 | 0 28/3/2013    |
| 1 | 0 28/3/2013 | 0 28/3/2013    |
| 1 | 0 28/3/2013 | 0 28/3/2013    |
| 1 | 0 28/3/2013 | 0 28/3/2013    |
| 1 | 0 28/3/2013 | 0 28/3/2013    |
| 1 | 0 28/3/2013 | 0 28/3/2013    |
| 1 | 0 28/3/2013 | 0 28/3/2013    |
| 1 | 4 28/3/2013 | 1 28/3/2013    |
| 1 | 0 28/3/2013 | 0 28/3/2013    |
| 1 | 0 28/3/2013 | 0 28/3/2013    |
| 0 | 28/3/2013   | 0 28/3/2013    |
| 1 | 0 28/3/2013 | 0 28/3/2013    |
| 1 | 0 28/3/2013 | 0 28/3/2013    |
| 1 | 0 28/3/2013 | 0 28/3/2013    |
| 1 | 0 28/3/2013 | 0 28/3/2013    |
| 0 | 28/3/2013   | 0 28/3/2013    |
| 1 | 0 28/3/2013 | 0 28/3/2013    |
| 1 | 0 28/3/2013 | 0 28/3/2013    |
| 1 | 0 28/3/2013 | 0 28/3/2013    |
| 1 | 0 20/2/203  | 0 21/02/2013 0 |
| 1 | 0 20/2/203  | 0 21/02/2013 0 |
| 1 | 0 20/2/203  | 0 21/02/2013 0 |
| 1 | 0 20/2/203  | 0 21/02/2013 0 |
| 1 | 0 20/2/203  | 0 21/02/2013 0 |
| 1 | 0 20/2/203  | 0 21/02/2012 0 |
| 1 | 0 20/2/203  | 0 21/02/2012 0 |
| 1 | 0 20/2/203  | 0 21/02/2013   |
| 0 | 20/2/203    |                |
| 0 | 20/2/203    |                |
| 1 | 0 20/2/203  | 0 21/02/2013 0 |
| 0 | 20/2/203    |                |
| 0 | 20/2/203    |                |
| 1 | 0 20/2/203  | 0 21/02/2013 0 |
| 1 | 0 20/2/203  | 0 21/02/2012 0 |
| 1 | 0 20/2/203  | 0 21/02/2012 0 |
| 1 | 0 20/2/203  | 0 21/02/2012 0 |
| 1 | 0 20/2/203  | 0 21/02/2012 0 |
| 1 | 0 20/2/203  | 0 21/02/2012 0 |
| 1 | 0 20/2/203  | 0 21/02/2012 0 |
| 0 | 20/2/203    |                |
| 1 | 0 20/2/203  | 0 21/02/2012 0 |
| 1 | 0 20/2/203  | 0 21/02/2012 0 |
| 1 | 0 20/2/203  | 0 21/02/2012 0 |
| 1 | 0 20/2/203  | 0 21/02/2012 0 |
| 1 | 0 20/2/2013 | 0 21/02/2012 0 |
| 1 | 0 20/2/2013 | 0 21/02/2012 0 |
| 1 | 0 20/2/2013 | 0 21/02/2012 0 |
| 1 | 0 20/2/2013 | 0 21/02/2013 0 |
| 1 | 0 20/2/2013 | 0 21/02/2012 0 |
| 0 | 20/2/2013   |                |
| 1 | 0 20/2/2013 | 0 21/02/2013 0 |

|   |   |           |   |            |         |
|---|---|-----------|---|------------|---------|
| 1 | 2 | 20/2/2013 | 4 | 21/02/2013 | 10      |
| 0 |   | 20/2/2013 |   |            |         |
| 1 | 0 | 20/2/2013 | 0 | 21/02/2013 | 0       |
| 1 | 0 | 20/2/2013 | 0 | 21/02/2012 | 0       |
| 1 | 0 | 20/2/2013 | 0 | 21/02/2012 | 0       |
| 1 | 0 | 20/2/2013 | 0 | 21/02/2012 | 0       |
| 1 | 0 | 20/2/2013 | 0 | 21/02/2012 | 0       |
| 0 |   | 20/2/2013 |   |            |         |
| 1 | 0 | 20/2/2013 | 0 | 21/02/2012 | 0       |
| 1 | 0 | 20/2/2013 | 0 | 21/02/2012 | 0       |
| 1 | 1 | 20/2/2013 | 0 | 21/02/2013 | 0       |
| 1 | 0 | 20/2/2013 | 0 | 21/02/2012 | 0       |
| 1 | 0 | 20/2/2013 | 0 | 21/02/2012 | 0       |
| 1 | 0 | 20/2/2013 | 0 | 21/02/2012 | 0       |
| 1 | 0 | 20/2/2013 | 0 | 21/02/2013 | 0       |
| 1 | 0 | 20/2/2013 | 0 | 21/02/2012 | 0       |
| 1 | 0 | 20/2/2013 | 0 | 21/02/2013 |         |
| 1 | 0 | 20/2/2013 | 0 | 21/02/2012 | 0       |
| 1 | 0 | 20/2/2013 | 0 | 21/02/2013 | 0       |
| 1 | 0 | 20/2/2013 | 0 | 21/02/2013 | 0       |
| 1 | 0 | 20/2/2013 | 0 | 21/02/2013 | 0       |
| 1 | 0 | 20/2/2013 | 0 | 21/02/2013 | 0       |
| 1 | 0 | 20/2/2013 | 0 | 21/02/2012 | 0       |
| 1 | 0 | 20/2/2013 | 0 | 21/02/2013 | 0       |
| 1 | 0 | 20/2/2013 | 0 | 21/02/2012 | 0       |
| 1 | 0 | 20/2/2013 | 0 | 21/02/2013 | 0       |
| 1 | 0 | 20/2/2013 | 0 | 21/02/2013 | 0       |
| 1 | 0 | 20/2/2013 | 0 | 21/02/2012 | 0       |
| 1 | 0 | 20/2/2013 | 0 | 21/02/2013 | 0       |
| 1 | 0 | 20/2/2013 | 0 | 21/02/2012 | 0       |
| 1 | 0 | 20/2/2013 | 0 | 21/02/2013 | 0       |
| 1 | 0 | 20/2/2013 | 0 | 21/02/2013 |         |
| 0 |   | 20/2/2013 |   |            |         |
| 0 | 0 | 20/2/2013 | 0 | 21/02/2013 | 0       |
| 0 |   | 20/2/2013 |   |            |         |
| 1 | 0 | 20/2/2013 | 0 | 21/02/2012 | 0       |
| 0 |   | 20/2/2013 |   |            |         |
| 1 | 0 | 20/2/2013 | 0 | 21/02/2012 | MISSING |
| 0 |   | 20/2/2013 |   |            |         |
| 1 | 0 | 20/2/2013 | 0 | 21/02/2012 |         |

|   |   |           |     |            |     |
|---|---|-----------|-----|------------|-----|
| 1 | 0 | 20/2/2013 | 0   | 21/02/2012 | 0   |
| 0 |   | 20/2/2013 |     |            |     |
| 1 | 0 | 20/2/2013 | 0   | 21/02/2012 | 0   |
| 0 |   | 20/2/2013 |     |            |     |
| 0 |   | 20/2/2013 |     |            |     |
| 1 | 0 | 20/2/2013 | 0   | 21/02/2012 | 0   |
| 1 | 0 | 20/2/2013 | 0   | 21/02/2012 | 0   |
| 1 | 0 | 20/2/2013 | 0   | 21/02/2013 | 0   |
| 0 |   | 20/2/2013 |     |            |     |
| 1 | 0 | 20/2/2013 | 0   | 21/02/2013 |     |
| 1 | 0 | 20/2/2013 | 0   | 21/02/2013 | 0   |
| 1 | 0 | 20/2/2013 | 0   | 21/02/2013 | 0   |
| 1 | 0 | 20/2/2013 | 0   | 21/02/2013 | 0   |
| 1 | 0 | 20/2/2013 | 0   | 21/02/2012 | 0   |
| 1 | 0 | 20/2/2013 | 0   | 21/02/2012 | 0   |
| 1 | 0 | 20/2/2013 | 0   | 21/02/2013 | 0   |
| 1 | 0 | 20/2/2013 | 0   | 21/02/2013 | 0   |
| 1 | 0 | 20/2/2013 | 0   | 21/02/2012 | 0   |
| 1 | 0 | 20/2/2013 | 0   | 21/02/2012 |     |
| 0 |   | 20/2/2013 |     |            |     |
| 0 |   | 20/2/2013 |     |            |     |
| 1 | 0 | 20/2/2013 | 0   | 21/02/2012 |     |
| 1 | 0 | 20/2/2013 | 0   | 21/02/2013 |     |
| 1 | 0 | 20/2/2013 | 0   | 21/02/2013 |     |
| 1 | 0 | 20/2/2013 | 0   | 21/02/2012 |     |
| 1 | 0 | 20/2/2013 | 0   | 21/02/2012 |     |
| 1 | 0 | 20/2/2013 | 0   | 21/02/2012 |     |
| 1 | 0 | 20/2/2013 | 0   | 21/02/2012 |     |
| 1 | 0 | 20/2/2013 | 0   | 21/02/2012 | 0   |
| 0 |   | 20/2/2013 |     |            |     |
| 1 | 0 | 20/2/2013 | 0   | 21/02/2013 |     |
| 1 | 0 | 20/2/2013 | 0   | 21/02/2013 |     |
| 1 | 0 | 20/2/2013 | 0   | 21/02/2012 |     |
| 1 | 0 | 20/2/2013 | 0   | 21/02/2013 |     |
| 0 |   | 20/2/2013 |     |            |     |
| 0 |   | 20/2/2013 |     |            |     |
| 1 | 0 | 20/2/2013 | 0   | 21/02/2012 |     |
| 1 | 0 | 20/2/2013 | 0   | 21/02/2012 |     |
| 1 | 0 | 20/2/2013 | 0   | 21/02/2012 |     |
| 1 |   | 20/2/2013 |     |            |     |
| 0 |   | 20/2/2013 |     |            |     |
| 0 |   | 20/2/2013 |     |            |     |
| 1 | 0 | 20/2/2013 | 0   | 21/02/2012 |     |
| 1 | 0 | 20/2/2013 | 0   | 21/02/2013 |     |
| 1 | 0 | 20/2/2013 | 0   | 21/02/2013 |     |
| 1 | 0 | 20/2/2013 | 0   | 21/02/2013 |     |
| 1 | 0 | 20/2/2013 | 0   | 21/02/2013 |     |
| 1 | 0 | 20/2/2013 | 0   | 21/02/2012 |     |
| 1 | 0 | 20/2/2013 | 0   | 21/02/2012 |     |
| 1 | 2 | 21/2/2013 | 117 | 22/2/2043  | 110 |
| 1 | 0 | 21/2/2013 | 0   | 22/2/2043  | 1   |

|   |             |               |         |
|---|-------------|---------------|---------|
| 1 | 0 21/2/2013 | 0 22/2/2043   | 0       |
| 1 | 0 21/2/2013 | 0 22/02/2013  | 0       |
| 1 | 0 21/2/2013 | 0 22/02/2013  | 0       |
| 1 | 0 21/2/2013 | 0 22/02/2013  | 0       |
| 1 | 0 21/2/2013 | 0 22/02/2013  | MISSING |
| 1 | 0 21/2/2013 | 0 22/02/2013  | 0       |
| 1 | 0 21/2/2013 | 0 22/02/2013  | 0       |
| 1 | 0 21/2/2013 | 0 22/02/2013  | 0       |
| 1 | 0 21/2/2013 | 0 22/2/2019   | 0       |
| 1 | 0 21/2/2013 | 0 22/2/2020   | 0       |
| 1 | 0 21/2/2013 | 0 22/2/2021   | 0       |
| 1 | 0 21/2/2013 | 0 22/02/2013  | 0       |
| 1 | 0 21/2/2013 | 0 22/02/2013  | 0       |
| 1 | 0 21/2/2013 | 0 22/02/2013  | 0       |
| 1 | 0 21/2/2013 | 0 22/2/2043   | 0       |
| 1 | 0 21/2/2013 | 0 22/02/2013  | 0       |
| 1 | 0 21/2/2013 | 0 22/02/2013  | MISSING |
| 1 | 0 21/2/2013 | 0 22/02/2013  |         |
| 1 | 0 21/2/2013 | 1 22/2/2043   |         |
| 1 | 0 21/2/2013 | 0 22/2/2043   | MISSING |
| 1 | 0 21/2/2013 | 0 22/02/2013  | 0       |
| 1 | 0 21/2/2013 | 0 22/02/2013  | 0       |
| 1 | 0 21/2/2013 | 0 22/02/2013  | 0       |
| 1 | 0 21/2/2013 | 0 22/02/2013  | 0       |
| 1 | 0 21/2/2013 | 0 22/02/2013  | 0       |
| 1 | 0 21/2/2013 | 0 22/02/2013  | 0       |
| 1 | 0 21/2/2013 | 0 22/02/2013  | 0       |
| 1 | 2 21/2/2013 | 311 22/2/2043 | 703     |
| 1 | 0 21/2/2013 | 0 22/02/2013  | 0       |
| 1 | 0 21/2/2013 | 0 22/02/2013  | 0       |
| 1 | 0 21/2/2013 | 0 22/02/2013  | 0       |
| 1 | 0 21/2/2013 | 0 22/2/2024   | 0       |
| 1 | 0 21/2/2013 | 0 22/2/2025   | 0       |
| 1 | 0 21/2/2013 | 0 22/2/2026   | 0       |
| 1 | 0 21/2/2013 | 0 22/2/2023   | 0       |
| 1 | 3 21/2/2013 | 0 22/2/2043   | 0       |
| 1 | 0 21/2/2013 | 0 22/2/2022   | 0       |
| 1 | 0 21/2/2013 | 0 22/02/2013  | 0       |
| 1 | 0 21/2/2013 | 0 22/02/2013  | MISSING |
| 1 | 0 21/2/2013 | 0 22/2/2043   | 0       |
| 1 | 0 21/2/2013 | 0 22/2/2043   | 0       |
| 1 | 0 21/2/2013 | 0 22/2/2043   | 0       |
| 1 | 1 21/2/2013 | 1 22/2/2043   | 1       |
| 1 | 0 21/2/2013 | 0 22/2/2043   | 0       |
| 1 | 0 21/2/2013 | 0 22/2/2043   | 0       |
| 1 | 0 21/2/2013 | 0 22/02/2013  | 0       |
| 1 | 1 21/2/2013 | 0 22/2/2014   | 0       |
| 1 | 0 21/2/2013 |               | 0       |
| 1 | 0 21/2/2013 | 0 22/2/2027   | 0       |
| 1 | 0 21/2/2013 | 1 22/2/2028   | 1       |
| 1 | 0 21/2/2013 | 0 22/2/2029   | 0       |

|   |             |              |   |
|---|-------------|--------------|---|
| 1 | 0 21/2/2013 | 0 22/02/2013 | 0 |
| 1 | 0 21/2/2013 | 0 22/02/2013 | 0 |
| 1 | 0 21/2/2013 | 0 22/02/2013 | 0 |
| 1 | 0 21/2/2013 | 0 22/02/2013 | 0 |
| 1 | 0 21/2/2013 | 0 22/02/2013 | 0 |
| 1 | 0 21/2/2013 | 0 22/02/2013 | 0 |
| 1 | 0 21/2/2013 | 0 22/2/2043  | 0 |
| 1 | 0 21/2/2013 | 0 22/2/2043  | 0 |
| 1 | 0 21/2/2013 | 0 22/2/2043  | 0 |
| 1 | 0 21/2/2013 | 0 22/2/2043  | 0 |
| 1 | 0 21/2/2013 | 0 22/2/2043  | 0 |
| 1 | 0 21/2/2013 | 0 22/2/2043  | 0 |
| 1 | 0 21/2/2013 | 0 22/2/2043  | 0 |
| 1 | 0 21/2/2013 | 0 22/2/2043  | 0 |
| 1 | 0 21/2/2013 | 0 22/02/2013 | 0 |
| 1 | 0 21/2/2013 | 0 22/2/2013  | 0 |
| 0 | 21/2/2013   |              |   |
| 1 | 0 21/2/2013 | 0 22/2/2043  | 0 |
| 1 | 1 21/2/2013 | 0 22/2/2043  | 0 |
| 1 | 0 21/2/2013 | 0 22/2/2043  | 0 |
| 0 | 21/2/2013   |              |   |
| 1 | 0 21/2/2013 | 0 22/2/2043  | 0 |
| 1 | 0 21/2/2013 | 0 22/2/2043  |   |
| 1 | 0 21/2/2013 | 0 22/2/2030  | 0 |
| 0 | 21/2/2013   |              |   |
| 1 | 0 21/2/2013 | 0 22/2/2043  | 0 |
| 1 | 0 21/2/2013 | 0 22/2/2041  | 0 |
| 1 | 0 21/2/2013 | 0 22/2/2031  |   |
| 1 | 0 21/2/2013 | 0 22/02/2013 | 0 |
| 1 | 0 21/2/2013 | 0 22/2/2015  | 0 |
| 1 | 0 21/2/2013 | 0 22/2/2016  | 0 |
| 1 | 0 21/2/2013 | 0 22/2/2017  | 0 |
| 1 | 0 21/2/2013 | 0 22/2/2018  | 0 |
| 1 | 0 21/2/2013 | 0 22/02/2013 | 0 |
| 1 | 0 21/2/2013 | 0 22/02/2013 | 0 |
| 1 | 0 21/2/2013 | 0 22/02/2013 | 0 |
| 1 | 0 21/2/2013 | 0 22/02/2013 | 0 |
| 1 | 0 21/2/2013 | 0 22/2/2032  | 0 |
| 1 | 0 21/2/2013 | 0 22/02/2013 | 0 |
| 1 | 0 21/2/2013 | 0 22/02/2013 | 0 |
| 1 | 0 21/2/2013 | 0 22/02/2013 | 0 |
| 1 | 0 21/2/2013 | 0 22/2/2043  | 0 |
| 1 | 0 21/2/2013 | 0 22/2/2035  | 0 |
| 1 | 0 21/2/2013 | 0 22/2/2037  | 0 |
| 1 | 0 21/2/2013 | 0 22/2/2038  | 0 |
| 1 | 0 21/2/2013 | 0 22/2/2040  | 0 |
| 1 | 0 21/2/2013 | 0 22/2/2043  | 0 |
| 1 | 0 21/2/2013 | 0 22/2/2034  |   |
| 1 | 0 21/2/2013 | 0 22/2/2033  | 0 |
| 1 | 0 21/2/2013 | 1 22/02/2013 | 0 |
| 1 | 0 21/2/2013 | 0 22/02/2013 |   |

|   |             |              |   |
|---|-------------|--------------|---|
| 1 | 0 21/2/2013 | 0 22/02/2013 |   |
| 1 | 0 21/2/2013 | 0 22/02/2013 |   |
| 1 | 0 21/2/2013 | 0 22/02/2013 |   |
| 1 | 0 21/2/2013 | 0 22/02/2013 |   |
| 1 | 0 21/2/2013 | 0 22/02/2013 |   |
| 1 | 0 21/2/2013 | 0 22/02/2013 |   |
| 1 | 0 21/2/2013 | 0 22/2/2043  |   |
| 1 | 0 21/2/2013 | 0 22/2/2036  |   |
| 1 | 0 21/2/2013 | 0 22/2/2039  |   |
| 1 | 0 21/2/2013 | 0 22/2/2043  |   |
| 1 | 0 21/2/2013 | 0 22/2/2042  |   |
| 1 | 0 21/2/2013 | 0 22/2/2043  |   |
| 0 | 21/2/2013   |              |   |
| 1 | 0 21/2/2013 | 0 22/2/2043  |   |
| 1 | 0 21/2/2013 | 0 22/2/2043  |   |
| 1 | 0 21/2/2013 | 0 22/2/2043  |   |
| 1 | 0 21/2/2013 | 0 22/2/2043  |   |
| 0 | 21/2/2013   |              |   |
| 1 | 0 21/2/2013 | 0 22/2/2043  |   |
| 1 | 0 21/2/2013 | 0 22/2/2043  |   |
| 1 | 0 21/2/2013 | 0 22/2/2043  |   |
| 1 | 0 21/2/2013 | 0 22/2/2043  |   |
| 1 | 1 21/2/2013 | 0 22/2/2043  | 0 |
| 0 | 21/2/2013   |              |   |
| 1 | 0 21/2/2013 | 0 22/02/2013 |   |
| 1 | 0 21/2/2013 | 0 22/02/2013 |   |
| 1 | 0 21/2/2013 | 0 22/2/2043  |   |
| 1 | 0 21/2/2013 | 0 22/2/2043  |   |
| 1 | 0 22/2/2013 | 0 25/2/2013  | 0 |
| 1 | 0 22/2/2013 | 0 25/2/2013  | 0 |
| 1 | 0 22/2/2013 | 0 25/2/2013  | 0 |
| 1 | 0 22/2/2013 | 0 25/2/2013  | 0 |
| 1 | 0 22/2/2013 | 0 25/2/2013  | 0 |
| 1 | 4 22/2/2013 | 0 25/2/2013  | 0 |
| 1 | 0 22/2/2013 | 0 25/2/2013  | 0 |
| 1 | 0 22/2/2013 | 0 25/2/2013  | 0 |
| 1 | 0 22/2/2013 | 0 25/2/2013  | 0 |
| 1 | 0 22/2/2013 | 0 25/2/2013  | 0 |
| 1 | 0 22/2/2013 | 0 25/2/2013  | 0 |
| 1 | 0 22/2/2013 | 0 25/2/2013  | 0 |
| 1 | 0 22/2/2013 | 0 25/2/2013  | 0 |
| 1 | 0 22/2/2013 | 0 25/2/2013  | 0 |
| 1 | 0 22/2/2013 | 0 25/2/2013  | 0 |
| 0 | 22/2/2013   |              |   |
| 1 | 0 22/2/2013 | 0 25/2/2013  | 0 |
| 1 | 0 22/2/2013 | 0 25/2/2013  | 0 |
| 1 | 0 22/2/2013 | 0 25/2/2013  | 0 |
| 0 | 22/2/2013   |              |   |
| 1 | 0 22/2/2013 | 0 25/2/2013  | 0 |
| 1 | 0 22/2/2013 | 0 25/2/2013  |   |













|   |              |                  |
|---|--------------|------------------|
| 1 | 0 02/05/2013 | 0 02/05/2013 0   |
| 0 | 02/05/2013   |                  |
| 1 | 0 02/05/2013 | 0 02/05/2013 0   |
| 1 | 0 02/05/2013 | 0 02/05/2013 0   |
| 1 | 0 02/05/2013 | 0 02/05/2013 0   |
| 1 | 0 02/05/2013 | 0 02/05/2013 0   |
| 1 | 0 02/05/2013 | 0 02/05/2013 0   |
| 1 | 0 02/05/2013 | 0 02/05/2013 0   |
| 1 | 1 02/05/2013 | 12 02/05/2013 18 |
| 1 | 0 02/05/2013 | 0 02/05/2013 0   |
| 1 | 02/05/2013   |                  |
| 1 | 0 02/05/2013 | 0 02/05/2013 0   |
| 0 | 02/05/2013   |                  |
| 1 | 0 02/05/2013 | 0 02/05/2013 0   |
| 1 | 0 02/05/2013 | 0 02/05/2013 0   |
| 1 | 0 02/05/2013 | 0 02/05/2013 0   |
| 1 | 0 02/05/2013 | 0 02/05/2013 0   |
| 0 | 02/05/2013   |                  |
| 1 | 0 02/05/2013 | 0 02/05/2013     |
| 1 | 0 02/05/2013 | 0 02/05/2013 0   |
| 0 | 02/05/2013   |                  |
| 1 | 0 02/05/2013 | 0 02/05/2013 0   |
| 1 | 0 02/05/2013 | 0 02/05/2013 0   |
| 1 | 0 02/05/2013 | 0 02/05/2013 0   |
| 1 | 0 02/05/2013 | 0 02/05/2013 0   |
| 0 | 02/05/2013   |                  |
| 1 | 0 02/05/2013 | 0 02/05/2013     |
| 1 | 0 02/05/2013 | 0 02/05/2013 0   |
| 0 | 02/05/2013   |                  |
| 0 | 02/05/2013   |                  |
| 0 | 02/05/2013   |                  |
| 1 | 0 02/05/2013 | 0 02/05/2013 0   |
| 1 | 0 02/05/2013 | 0 02/05/2013 0   |
| 1 | 0 02/05/2013 | 0 02/05/2013 0   |
| 1 | 0 02/05/2013 | 0 02/05/2013 0   |
| 1 | 0 02/05/2013 | 0 02/05/2013 0   |
| 0 | 02/05/2013   |                  |
| 1 | 0 02/05/2013 | 0 02/05/2013 0   |
| 0 | 02/05/2013   |                  |
| 0 | 02/05/2013   |                  |
| 1 | 0 02/05/2013 | 0 02/05/2013 0   |
| 1 | 0 02/05/2013 | 0 02/05/2013 0   |
| 0 | 02/05/2013   |                  |
| 1 | 0 02/05/2013 | 0 02/05/2013 0   |
| 0 | 02/05/2013   |                  |
| 1 | 3 02/05/2013 | 0 02/05/2013 28  |
| 1 | 0 02/05/2013 | 0 02/05/2013 0   |
| 0 | 02/05/2013   |                  |
| 1 | 0 02/05/2013 | 0 02/05/2013 0   |
| 0 | 02/05/2013   |                  |



|   |              |              |   |
|---|--------------|--------------|---|
| 1 | 0 02/05/2013 | 0 02/05/2013 |   |
| 1 | 0 02/05/2013 | 0 02/05/2013 |   |
| 1 | 0 02/05/2013 | 0 02/05/2013 | 0 |
| 1 | 0 02/05/2013 | 0 02/05/2013 |   |
| 1 | 0 02/05/2013 | 0 02/05/2013 |   |
| 1 | 0 02/05/2013 | 0 02/05/2013 |   |
| 1 | 0 02/05/2013 | 0 02/05/2013 |   |
| 1 | 0 02/05/2013 | 0 02/05/2013 |   |
| 1 | 0 02/05/2013 | 0 02/05/2013 |   |
| 1 | 0 02/05/2013 | 0 02/05/2013 |   |
| 1 | 0 02/05/2013 | 0 02/05/2013 |   |
| 0 | 02/05/2013   |              |   |
| 0 | 02/05/2013   |              |   |
| 1 | 0 02/05/2013 | 0 02/05/2013 |   |
| 1 | 0 02/05/2013 | 0 02/05/2013 |   |
| 1 | 0 02/05/2013 | 0 02/05/2013 |   |
| 0 | 02/05/2013   |              |   |
| 0 | 02/05/2013   |              |   |
| 1 | 0 22/2/2013  | 0 26/2/2013  | 0 |
| 1 | 0 22/2/2013  | 0 26/2/2013  | 0 |
| 1 | 0 22/2/2013  | 0 26/2/2013  | 0 |
| 1 | 0 22/2/2013  | 0 26/2/2013  | 0 |
| 1 | 0 22/2/2013  | 3 26/2/2013  | 7 |
| 0 | 22/2/2013    |              |   |
| 1 | 0 22/2/2013  | 0 26/2/2013  | 0 |
| 1 | 22/2/2013    |              |   |
| 1 | 0 22/2/2013  | 0 26/2/2013  | 0 |
| 1 | 0 22/2/2013  | 0 26/2/2013  | 0 |
| 1 | 0 22/2/2013  | 0 26/2/2013  | 0 |
| 1 | 0 22/2/2013  | 0 26/2/2013  | 0 |
| 1 | 0 22/2/2013  | 0 26/2/2013  | 0 |
| 1 | 22/2/2013    |              |   |
| 1 | 0 22/2/2013  | 0 26/2/2013  | 0 |
| 0 | 22/2/2013    |              |   |
| 1 | 2 22/2/2013  | 0 26/2/2013  | 0 |
| 0 | 22/2/2013    |              |   |
| 1 | 0 22/2/2013  | 0 26/2/2013  | 0 |
| 0 | 22/2/2013    |              |   |
| 1 | 0 22/2/2013  | 0 26/2/2013  | 0 |
| 1 | 0 22/2/2013  | 0 26/2/2013  | 0 |
| 1 | 0 22/2/2013  | 0 26/2/2013  | 0 |
| 1 | 0 22/2/2013  | 0 26/2/2013  | 0 |
| 1 | 0 22/2/2013  | 0 26/2/2013  | 0 |
| 1 | 0 22/2/2013  | 0 26/2/2013  | 0 |
| 0 | 22/2/2013    |              |   |
| 1 | 22/2/2013    |              |   |
| 0 | 22/2/2013    |              |   |
| 1 | 0 22/2/2013  | 0 26/2/2013  | 0 |
| 0 | 22/2/2013    |              |   |
| 1 | 0 22/2/2013  | 0 26/2/2013  | 0 |

|   |   |           |    |           |    |
|---|---|-----------|----|-----------|----|
| 1 | 0 | 22/2/2013 | 0  | 26/2/2013 | 0  |
| 1 | 0 | 22/2/2013 | 0  | 26/2/2013 | 0  |
| 1 | 0 | 22/2/2013 | 0  | 26/2/2013 | 0  |
| 1 | 0 | 22/2/2013 | 0  | 26/2/2013 | 0  |
| 1 | 0 | 22/2/2013 | 0  | 26/2/2013 | 0  |
| 1 | 0 | 22/2/2013 | 0  | 26/2/2013 | 0  |
| 1 | 0 | 22/2/2013 | 0  | 26/2/2013 | 0  |
| 1 | 0 | 22/2/2013 | 0  | 26/2/2013 | 0  |
| 0 |   | 22/2/2013 |    |           |    |
| 1 | 2 | 22/2/2013 | 0  | 26/2/2013 | 0  |
| 1 | 0 | 22/2/2013 | 0  | 26/2/2013 | 0  |
| 1 | 0 | 22/2/2013 | 0  | 26/2/2013 |    |
| 1 | 0 | 22/2/2013 | 0  | 26/2/2013 | 0  |
| 1 | 0 | 22/2/2013 | 0  | 26/2/2013 | 0  |
| 1 | 0 | 22/2/2013 | 0  | 26/2/2013 | 0  |
| 0 |   | 22/2/2013 |    |           |    |
| 0 |   | 22/2/2013 |    |           |    |
| 1 | 0 | 22/2/2013 | 2  | 26/2/2013 | 2  |
| 1 | 0 | 22/2/2013 | 0  | 26/2/2013 | 0  |
| 1 | 0 | 22/2/2013 | 0  | 26/2/2013 | 0  |
| 0 |   | 22/2/2013 |    |           |    |
| 1 | 0 | 22/2/2013 | 0  | 26/2/2013 | 0  |
| 1 | 0 | 22/2/2013 | 0  | 26/2/2013 | 0  |
| 0 |   | 22/2/2013 |    |           |    |
| 1 | 0 | 22/2/2013 | 0  | 26/2/2013 | 0  |
| 0 |   | 22/2/2013 |    |           |    |
| 0 |   | 22/2/2013 |    |           |    |
| 1 | 0 | 22/2/2013 | 0  | 26/2/2013 | 0  |
| 1 | 0 | 22/2/2013 | 0  | 26/2/2013 | 0  |
| 0 |   | 22/2/2013 |    |           |    |
| 1 | 0 | 22/2/2013 | 0  | 26/2/2013 | 0  |
| 1 | 0 | 22/2/2013 | 0  | 26/2/2013 | 0  |
| 0 |   | 22/2/2013 |    |           |    |
| 1 | 0 | 22/2/2013 | 0  | 26/2/2013 | 0  |
| 1 | 0 | 22/2/2013 | 0  | 26/2/2013 | 0  |
| 0 |   | 22/2/2013 |    |           |    |
| 1 | 0 | 22/2/2013 | 0  | 26/2/2013 | 0  |
| 1 | 0 | 22/2/2013 | 0  | 26/2/2013 | 0  |
| 0 |   | 22/2/2013 |    |           |    |
| 1 | 0 | 22/2/2013 | 0  | 26/2/2013 | 0  |
| 1 | 0 | 22/2/2013 | 0  | 26/2/2013 | 0  |
| 1 | 0 | 22/2/2013 | 0  | 26/2/2013 | 0  |
| 1 | 0 | 22/2/2013 | 0  | 26/2/2013 | 0  |
| 1 | 0 | 22/2/2013 | 1  | 26/2/2013 | 0  |
| 1 | 0 | 22/2/2013 | 0  | 26/2/2013 | 0  |
| 0 |   | 22/2/2013 |    |           |    |
| 1 | 0 | 22/2/2013 | 0  | 26/2/2013 | 0  |
| 1 | 0 | 22/2/2013 | 0  | 26/2/2013 | 1  |
| 1 | 0 | 22/2/2013 | 0  | 26/2/2013 | 0  |
| 1 | 0 | 22/2/2013 | 0  | 26/2/2013 | 0  |
| 1 | 4 | 22/2/2013 | 28 | 26/2/2013 | 75 |
| 1 | 0 | 22/2/2013 | 0  | 26/2/2013 | 0  |
| 1 | 0 | 22/2/2013 | 0  | 26/2/2013 | 0  |
| 0 |   | 22/2/2013 |    |           |    |
| 1 | 0 | 22/2/2013 | 0  | 26/2/2013 | 0  |
| 1 | 1 | 22/2/2013 | 15 | 26/2/2013 | 26 |



|   |             |              |    |  |
|---|-------------|--------------|----|--|
| 0 | 22/2/2013   |              |    |  |
| 0 | 22/2/2013   |              |    |  |
| 0 | 22/2/2013   |              |    |  |
| 1 | 0 22/2/2013 | 0 26/2/2013  | 0  |  |
| 1 | 0 22/2/2013 | 0 26/2/2013  | 0  |  |
| 1 | 0 22/2/2013 | 0 26/2/2013  | 0  |  |
| 0 | 22/2/2013   |              |    |  |
| 1 | 0 22/2/2013 | 0 26/2/2013  | 0  |  |
| 1 | 0 22/2/2013 | 0 26/2/2013  | 0  |  |
| 0 | 22/2/2013   |              |    |  |
| 1 | 0 22/2/2013 | 0 26/2/2013  | 0  |  |
| 1 | 0 22/2/2013 | 0 26/2/2013  | 0  |  |
| 1 | 1 22/2/2013 | 0 26/2/2013  | 0  |  |
| 1 | 0 22/2/2013 | 0 26/2/2013  | 0  |  |
| 1 | 0 22/2/2013 | 0 26/2/2013  | 0  |  |
| 1 | 0 22/2/2013 | 0 26/2/2013  | 0  |  |
| 0 | 22/2/2013   |              |    |  |
| 0 | 22/2/2013   |              |    |  |
| 0 | 22/2/2013   |              |    |  |
| 1 | 0 22/2/2013 | 0 26/2/2013  |    |  |
| 1 | 0 22/2/2013 | 0 26/2/2013  |    |  |
| 1 | 0 22/2/2013 | 0 26/2/2013  | 0  |  |
| 1 | 0 22/2/2013 | 0 26/2/2013  |    |  |
| 1 | 0 22/2/2013 | 0 26/2/2013  |    |  |
| 0 | 22/2/2013   |              |    |  |
| 1 | 0 22/2/2013 | 0 26/2/2013  |    |  |
| 1 | 0 22/2/2013 |              |    |  |
| 1 | 0 22/2/2013 | 0 26/2/2013  |    |  |
| 1 | 0 22/2/2013 | 0 26/2/2013  |    |  |
| 0 | 22/2/2013   |              |    |  |
| 1 | 0 22/2/2013 | 0 26/2/2013  |    |  |
| 1 | 0 22/2/2013 | 0 26/2/2013  |    |  |
| 1 | 0 22/2/2013 | 0 26/2/2013  |    |  |
| 1 | 1 22/2/2013 | 20 26/2/2013 | 33 |  |
| 0 | 22/2/2013   |              |    |  |
| 0 | 22/2/2013   |              |    |  |
| 1 | 0 22/2/2013 |              |    |  |
| 1 | 0 22/2/2013 | 0 26/2/2013  |    |  |
| 1 | 0 22/2/2013 | 0 26/2/2013  |    |  |
| 1 | 0 22/2/2013 | 0 26/2/2013  |    |  |
| 1 | 0 22/2/2013 | 0 26/2/2013  |    |  |
| 0 | 22/2/2013   | 0 26/2/2013  |    |  |
| 1 | 0 22/2/2013 | 0 26/2/2013  |    |  |
| 1 | 0 22/2/2013 | 0 26/2/2013  |    |  |
| 1 | 0 22/2/2013 | 0 26/2/2013  |    |  |
| 0 | 22/2/2013   | 0 26/2/2013  |    |  |
| 1 | 0 22/2/2013 | 0 26/2/2013  |    |  |
| 1 | 0 22/2/2013 | 0 26/2/2013  |    |  |
| 1 | 0 22/2/2013 | 0 26/2/2013  |    |  |
| 1 | 0 18/4/2013 | 0 18/4/2013  | 0  |  |
| 1 | 0 18/4/2013 | 0 18/4/2013  | 0  |  |







|   |             |             |   |
|---|-------------|-------------|---|
| 0 | 19/3/2013   |             |   |
| 1 | 0 19/3/2013 | 0 20/3/2013 | 0 |
| 1 | 0 19/3/2013 | 0 20/3/2013 | 0 |
| 0 | 19/3/2013   |             |   |
| 0 | 19/3/2013   |             |   |
| 1 | 0 19/3/2013 | 0 20/3/2013 | 0 |
| 0 | 19/3/2013   |             |   |
| 1 | 0 19/3/2013 | 0 20/3/2013 | 0 |
| 1 | 0 19/3/2013 | 0 20/3/2013 | 0 |
| 1 | 0 19/3/2013 | 0 20/3/2013 | 0 |
| 1 | 0 19/3/2013 | 0 20/3/2013 | 0 |
| 1 | 0 19/3/2013 | 0 20/3/2013 | 0 |
| 0 | 19/3/2013   |             |   |
| 0 | 19/3/2013   |             |   |
| 0 | 19/3/2013   |             |   |
| 0 | 19/3/2013   |             |   |
| 1 | 0 19/3/2013 | 0 20/3/2013 | 0 |
| 0 | 19/3/2013   |             |   |
| 1 | 0 19/3/2013 | 7 20/3/2013 | 7 |
| 0 | 19/3/2013   |             |   |
| 0 | 19/3/2013   |             |   |
| 1 | 0 19/3/2013 | 0 20/3/2013 | 0 |
| 0 | 19/3/2013   |             |   |
| 1 | 0 19/3/2013 | 0 20/3/2013 | 0 |
| 1 | 0 19/3/2013 | 0 20/3/2013 | 0 |
| 1 | 0 19/3/2013 | 0 20/3/2013 | 0 |
| 1 | 0 19/3/2013 | 0 20/3/2013 | 0 |
| 0 | 19/3/2013   |             |   |
| 0 | 19/3/2013   |             |   |
| 1 | 0 19/3/2013 | 0 20/3/2013 | 0 |
| 1 | 0 19/3/2013 | 0 20/3/2013 | 0 |
| 1 | 0 19/3/2013 | 0 20/3/2013 | 0 |
| 0 | 19/3/2013   |             |   |
| 1 | 0 19/3/2013 | 0 20/3/2013 | 0 |
| 0 | 19/3/2013   |             |   |
| 1 | 0 19/3/2013 | 0 20/3/2013 | 0 |
| 1 | 0 19/3/2013 | 0 20/3/2013 | 0 |
| 1 | 0 19/3/2013 | 0 20/3/2013 | 0 |
| 0 | 19/3/2013   |             |   |
| 1 | 0 19/3/2013 | 0 20/3/2013 | 0 |
| 1 | 0 19/3/2013 | 0 20/3/2013 | 0 |
| 1 | 0 19/3/2013 | 0 20/3/2013 | 0 |
| 1 | 0 19/3/2013 | 0 20/3/2013 | 0 |
| 1 | 0 19/3/2013 | 0 20/3/2013 | 0 |
| 1 | 0 19/3/2013 | 0 20/3/2013 | 0 |
| 0 | 19/3/2013   |             |   |

|   |   |           |   |           |   |
|---|---|-----------|---|-----------|---|
| 1 | 0 | 19/3/2013 | 0 | 20/3/2013 | 0 |
| 1 | 0 | 19/3/2013 | 0 | 20/3/2013 | 0 |
| 1 | 0 | 19/3/2013 | 0 | 20/3/2013 | 0 |
| 1 | 0 | 19/3/2013 | 0 | 20/3/2013 | 0 |
| 1 | 4 | 19/3/2013 | 0 | 20/3/2013 | 0 |
| 1 | 0 | 19/3/2013 | 0 | 20/3/2013 | 0 |
| 1 | 0 | 19/3/2013 | 0 | 20/3/2013 | 0 |
| 0 |   | 19/3/2013 |   |           |   |
| 1 | 0 | 19/3/2013 | 0 | 20/3/2013 | 0 |
| 1 | 0 | 19/3/2013 | 0 | 20/3/2013 | 0 |
| 1 | 0 | 19/3/2013 | 0 | 20/3/2013 | 0 |
| 1 | 0 | 19/3/2013 | 0 | 20/3/2013 | 0 |
| 1 | 0 | 19/3/2013 | 0 | 20/3/2013 | 0 |
| 1 | 0 | 19/3/2013 | 0 | 20/3/2013 | 0 |
| 1 | 0 | 19/3/2013 | 0 | 20/3/2013 | 0 |
| 1 | 0 | 19/3/2013 | 0 | 20/3/2013 | 0 |
| 1 | 0 | 19/3/2013 | 0 | 20/3/2013 | 0 |
| 0 |   | 19/3/2013 |   |           |   |
| 1 | 0 | 19/3/2013 | 0 | 20/3/2013 | 0 |
| 1 | 0 | 19/3/2013 | 0 | 20/3/2013 | 0 |
| 1 | 0 | 19/3/2013 | 0 | 20/3/2013 | 0 |
| 1 | 0 | 19/3/2013 | 0 | 20/3/2013 | 0 |
| 1 | 0 | 19/3/2013 | 0 | 27/3/2013 | 0 |
| 1 | 0 | 19/3/2013 | 0 | 20/3/2013 | 0 |
| 1 | 0 | 19/3/2013 | 0 | 20/3/2013 | 0 |
| 1 | 0 | 19/3/2013 | 0 | 20/3/2013 | 0 |
| 0 |   | 19/3/2013 |   |           |   |
| 0 |   | 19/3/2013 |   |           |   |
| 1 | 0 | 19/3/2013 | 0 | 20/3/2013 |   |
| 1 | 0 | 19/3/2013 | 0 | 20/3/2013 |   |
| 0 |   | 19/3/2013 |   |           |   |
| 1 | 0 | 19/3/2013 | 0 | 20/3/2013 |   |
| 1 | 4 | 19/3/2013 | 2 | 20/3/2013 | 3 |
| 0 |   | 19/3/2013 |   |           |   |
| 0 |   | 19/3/2013 |   |           |   |
| 1 | 0 | 19/3/2013 | 0 | 20/3/2013 |   |
| 0 |   | 19/3/2013 |   |           |   |
| 0 |   | 19/3/2013 |   |           |   |
| 1 | 0 | 19/3/2013 | 0 | 20/3/2013 |   |
| 1 | 0 | 19/3/2013 | 0 | 20/3/2013 |   |
| 1 | 0 | 19/3/2013 | 2 | 20/3/2013 |   |
| 0 |   | 19/3/2013 |   |           |   |
| 0 |   | 19/3/2013 |   |           |   |
| 1 | 0 | 19/3/2013 | 0 | 20/3/2013 |   |
| 0 |   | 19/3/2013 |   |           |   |
| 0 |   | 19/3/2013 |   |           |   |
| 1 | 0 | 19/3/2013 | 0 | 20/3/2013 | 0 |
| 1 | 3 | 19/3/2013 | 0 | 20/3/2013 |   |
| 1 | 0 | 19/3/2013 | 0 | 20/3/2013 | 0 |
| 1 | 0 | 19/3/2013 | 0 | 20/3/2013 | 0 |

|   |   |           |    |           |    |
|---|---|-----------|----|-----------|----|
| 1 | 0 | 19/3/2013 | 0  | 20/3/2013 | 0  |
| 0 |   | 19/3/2013 |    |           |    |
| 1 | 0 | 19/3/2013 | 0  | 20/3/2013 |    |
| 1 | 0 | 19/3/2013 | 0  | 20/3/2013 |    |
| 0 |   | 19/3/2013 |    |           |    |
| 1 | 0 | 19/3/2013 | 0  | 20/3/2013 |    |
| 1 | 0 | 19/3/2013 | 0  | 20/3/2013 |    |
| 1 | 0 | 19/3/2013 | 0  | 20/3/2013 |    |
| 1 | 0 | 14/3/2013 | 0  | 14/3/2013 | 0  |
| 1 | 0 | 14/3/2013 | 0  | 14/3/2013 | 0  |
| 1 | 0 | 14/3/2013 | 0  | 14/3/2013 | 0  |
| 1 | 0 | 14/3/2013 | 0  | 14/3/2013 | 0  |
| 1 | 0 | 14/3/2013 | 0  | 14/3/2013 | 0  |
| 1 | 0 | 14/3/2013 | 0  | 14/3/2013 | 0  |
| 1 | 0 | 14/3/2013 | 0  | 14/3/2013 | 0  |
| 1 | 0 | 14/3/2013 | 0  | 14/3/2013 | 0  |
| 1 | 4 | 14/3/2013 | 0  | 14/3/2013 | 0  |
| 1 | 0 | 14/3/2013 | 0  | 14/3/2013 | 0  |
| 1 | 0 | 14/3/2013 | 0  | 14/3/2013 | 0  |
| 1 | 0 | 14/3/2013 | 0  | 14/3/2013 | 0  |
| 1 | 0 | 14/3/2013 | 0  | 14/3/2013 | 10 |
| 1 | 0 | 14/3/2013 | 0  | 14/3/2013 | 0  |
| 0 |   | 14/3/2013 |    |           |    |
| 1 | 0 | 14/3/2013 | 0  | 14/3/2013 | 0  |
| 1 | 0 | 14/3/2013 | 2  | 14/3/2013 | 2  |
| 1 | 0 | 14/3/2013 | 0  | 14/3/2013 | 0  |
| 1 | 0 | 14/3/2013 | 0  | 14/3/2013 | 0  |
| 1 | 0 | 14/3/2013 | 0  | 14/3/2013 |    |
| 1 | 0 | 14/3/2013 | 0  | 14/3/2013 | 0  |
| 1 | 0 | 14/3/2013 | 0  | 14/3/2013 | 0  |
| 1 | 0 | 14/3/2013 | 0  | 14/3/2013 | 0  |
| 1 | 0 | 14/3/2013 | 0  | 14/3/2013 | 0  |
| 1 | 0 | 14/3/2013 | 0  | 14/3/2013 | 0  |
| 1 | 0 | 14/3/2013 | 0  | 14/3/2013 | 0  |
| 0 |   | 14/3/2013 |    |           |    |
| 1 | 0 | 14/3/2013 | 0  | 14/3/2013 | 0  |
| 0 |   | 14/3/2013 |    |           |    |
| 1 | 0 | 14/3/2013 | 0  | 14/3/2013 | 0  |
| 1 | 0 | 14/3/2013 | 0  | 14/3/2013 | 0  |
| 1 | 0 | 14/3/2013 | 0  | 14/3/2013 | 0  |
| 1 | 0 | 14/3/2013 | 0  | 14/3/2013 | 0  |
| 1 | 0 | 14/3/2013 | 0  | 14/3/2013 | 0  |
| 1 | 0 | 14/3/2013 | 0  | 14/3/2013 | 0  |
| 1 | 0 | 14/3/2013 | 0  | 14/3/2013 | 0  |
| 1 | 0 | 14/3/2013 | 21 | 14/3/2013 | 32 |
| 1 | 0 | 14/3/2013 | 0  | 14/3/2013 | 0  |
| 1 | 0 | 14/3/2013 | 0  | 14/3/2013 | 0  |
| 1 | 0 | 14/3/2013 | 0  | 14/3/2013 | 0  |
| 1 | 0 | 14/3/2013 | 0  | 14/3/2013 | 0  |
| 1 | 0 | 14/3/2013 | 0  | 14/3/2013 | 0  |
| 0 |   | 14/3/2013 |    |           |    |
| 1 | 4 | 14/3/2013 | 3  | 14/3/2013 | 5  |











|   |             |               |     |
|---|-------------|---------------|-----|
| 1 | 0 15/3/2013 | 0 18/3/2013   |     |
| 1 | 0 15/3/2013 | 0 18/3/2013   |     |
| 1 | 0 15/3/2013 | 0 18/3/2013   |     |
| 1 | 0 15/3/2013 | 0 18/3/2013   |     |
| 0 | 15/3/2013   |               |     |
| 1 | 0 15/3/2013 | 0 18/3/2013   |     |
| 1 | 0 15/3/2013 | 0 18/3/2013   |     |
| 1 | 0 15/3/2013 | 0 18/3/2013   |     |
| 1 | 0 15/3/2013 | 0 18/3/2013   |     |
| 1 | 0 15/3/2013 | 0 18/3/2013   |     |
| 1 | 0 15/3/2013 | 0 18/3/2013   |     |
| 1 | 0 15/3/2013 | 0 18/3/2013   |     |
| 1 | 0 15/3/2013 | 0 18/3/2013   |     |
| 1 | 0 15/3/2013 | 0 18/3/2013   |     |
| 1 | 0 15/3/2013 | 0 18/3/2013   |     |
| 1 | 0 15/3/2013 | 0 18/3/2013   |     |
| 1 | 3 15/3/2013 | 630 18/3/2013 | 423 |

| Test date/series      | CAA (pg/ml)         | CAA pn | Ratio UCP          | Assay    |
|-----------------------|---------------------|--------|--------------------|----------|
| 18-11-2013 - series 1 | 0.0000000000000000  | neg    | 0.016398819285012  | UCAA2000 |
| 18-11-2013 - series 1 | 0.0000000000000000  | neg    | 0.0222222222222222 | UCAA2000 |
| 18-11-2013 - series 1 | 0.0000000000000000  | neg    | 0.019683908045977  | UCAA2000 |
| 18-11-2013 - series 1 | 0.0000000000000000  | neg    | 0.019440042260961  | UCAA2000 |
| 18-11-2013 - series 1 | 0.0000000000000000  | neg    | 0.011022927689594  | UCAA2000 |
| 18-11-2013 - series 1 | 0.0164703297673097  | neg    | 0.039509954058193  | UCAA2000 |
| 18-11-2013 - series 1 | 0.0454156555959439  | neg    | 0.056022808267997  | UCAA2000 |
| 18-11-2013 - series 1 | 0.0000000000000000  | neg    | 0.019719976336028  | UCAA2000 |
| 18-11-2013 - series 1 | 0.0138200641057651  | neg    | 0.037866069763104  | UCAA2000 |
| 18-11-2013 - series 1 | 0.1596178560387530  | neg    | 0.111903526970954  | UCAA2000 |
| 18-11-2013 - series 1 | 16.6590661529444000 | pos    | 2.774375743162900  | UCAA2000 |
| 18-11-2013 - series 1 | 0.0000000000000000  | neg    | 0.010490977759127  | UCAA2000 |
| 18-11-2013 - series 1 | 0.0405717383726756  | neg    | 0.053386341047849  | UCAA2000 |
| 18-11-2013 - series 1 | 0.0181565487380255  | neg    | 0.040538625088590  | UCAA2000 |
| 18-11-2013 - series 1 | 0.0000000000000000  | neg    | 0.011212019284673  | UCAA2000 |
| 18-11-2013 - series 1 | 0.0000000000000000  | neg    | 0.025862068965517  | UCAA2000 |
| 18-11-2013 - series 1 | 0.0149055650623216  | neg    | 0.038543689320388  | UCAA2000 |
| 18-11-2013 - series 1 | 0.0090601383753763  | neg    | 0.034807641978540  | UCAA2000 |
| 18-11-2013 - series 1 | 0.0000000000000000  | neg    | 0.014216661927779  | UCAA2000 |
| 18-11-2013 - series 1 | 0.0000000000000000  | neg    | 0.010683760683761  | UCAA2000 |
| 18-11-2013 - series 1 | 0.0000000000000000  | neg    | 0.014819205690575  | UCAA2000 |
| 18-11-2013 - series 1 | 0.0000000000000000  | neg    | 0.011664528169836  | UCAA2000 |
| 18-11-2013 - series 1 | 0.0000000000000000  | neg    | 0.013908205841447  | UCAA2000 |
| 18-11-2013 - series 1 | 0.0000000000000000  | neg    | 0.015062509414068  | UCAA2000 |
| 18-11-2013 - series 1 | 12.8071235356559000 | pos    | 2.435775734203500  | UCAA2000 |
| 18-11-2013 - series 1 | 0.0000000000000000  | neg    | 0.016798252981690  | UCAA2000 |
| 18-11-2013 - series 1 | 0.0000000000000000  | neg    | 0.014037057832678  | UCAA2000 |
| 18-11-2013 - series 1 | 0.0000000000000000  | neg    | 0.012523481527865  | UCAA2000 |
| 18-11-2013 - series 1 | 0.0000000000000000  | neg    | 0.015992323684631  | UCAA2000 |
| 18-11-2013 - series 1 | 0.0984417610459948  | neg    | 0.083104284559418  | UCAA2000 |
| 18-11-2013 - series 1 | 0.0000000000000000  | neg    | 0.012163970319912  | UCAA2000 |
| 18-11-2013 - series 1 | 0.0000000000000000  | neg    | 0.014505366985785  | UCAA2000 |
| 18-11-2013 - series 1 | 0.0000000000000000  | neg    | 0.014845605700713  | UCAA2000 |
| 18-11-2013 - series 1 | 0.0075458718780834  | neg    | 0.033796634967081  | UCAA2000 |
| 18-11-2013 - series 2 | 15.5671392720495000 | pos    | 2.686118479221930  | UCAA2000 |
| 18-11-2013 - series 2 | 0.0000000000000000  | neg    | 0.006293832044596  | UCAA2000 |
| 18-11-2013 - series 2 | 0.0000000000000000  | neg    | 0.019967218000298  | UCAA2000 |
| 18-11-2013 - series 2 | 0.0477836016156388  | neg    | 0.057298335467350  | UCAA2000 |
| 18-11-2013 - series 2 | 0.0619937546105507  | neg    | 0.064795564795565  | UCAA2000 |
| 18-11-2013 - series 2 | 0.1320932960954840  | neg    | 0.099183736331434  | UCAA2000 |
| 18-11-2013 - series 2 | 0.0000000000000000  | neg    | 0.017959770114943  | UCAA2000 |
| 18-11-2013 - series 2 | 0.0164230011025499  | neg    | 0.039480899287150  | UCAA2000 |
| 18-11-2013 - series 2 | 0.0000000000000000  | neg    | 0.024553348637589  | UCAA2000 |
| 18-11-2013 - series 2 | 0.0000000000000000  | neg    | 0.006915213469633  | UCAA2000 |
| 18-11-2013 - series 2 | 0.0000000000000000  | neg    | 0.011448481831757  | UCAA2000 |
| 18-11-2013 - series 2 | 0.0000000000000000  | neg    | 0.013579576317219  | UCAA2000 |
| 18-11-2013 - series 2 | 4.1230298886774200  | pos    | 1.219200000000000  | UCAA2000 |

|                       |                    |            |                    |          |
|-----------------------|--------------------|------------|--------------------|----------|
| 18-11-2013 - series 2 | 0.0000000000000000 | neg        | 0.0160000000000000 | UCAA2000 |
| 18-11-2013 - series 2 | 0.0000000000000000 | neg        | 0.016509823344890  | UCAA2000 |
| 18-11-2013 - series 2 | 0.0000000000000000 | neg        | 0.012280486307258  | UCAA2000 |
| 18-11-2013 - series 2 | 0.0000000000000000 | neg        | 0.015969338869371  | UCAA2000 |
| 18-11-2013 - series 2 | 0.0117833965744434 | neg        | 0.036576444769568  | UCAA2000 |
| 18-11-2013 - series 2 | 0.0000000000000000 | neg        | 0.016431153466973  | UCAA2000 |
| 18-11-2013 - series 2 | 0.0000000000000000 | neg        | 0.013175230566535  | UCAA2000 |
| 18-11-2013 - series 2 | 0.0000000000000000 | neg        | 0.013588802826471  | UCAA2000 |
| 18-11-2013 - series 2 | 0.0000000000000000 | neg        | 0.020495867768595  | UCAA2000 |
| 18-11-2013 - series 2 | 0.0105234753245234 | neg        | 0.035765124555160  | UCAA2000 |
| 18-11-2013 - series 2 | 0.0000000000000000 | neg        | 0.018135654697135  | UCAA2000 |
| 18-11-2013 - series 2 | 0.0000000000000000 | neg        | 0.005242966751918  | UCAA2000 |
| 18-11-2013 - series 2 | 0.0960812828970658 | neg        | 0.081950359817888  | UCAA2000 |
| 18-11-2013 - series 2 | 0.0708027356905505 | neg        | 0.069327731092437  | UCAA2000 |
| 18-11-2013 - series 2 | 0.0217688171534628 | neg        | 0.042704065553104  | UCAA2000 |
| 18-11-2013 - series 2 | 0.0292561332162755 | neg        | 0.047058823529412  | UCAA2000 |
| 18-11-2013 - series 2 | 0.3575700388193560 | indecisive | 0.196176604460628  | UCAA2000 |
| 18-11-2013 - series 2 | 0.0802290836383550 | neg        | 0.074095682613769  | UCAA2000 |
| 18-11-2013 - series 2 | 0.0048005597991952 | neg        | 0.031894636623294  | UCAA2000 |
| 18-11-2013 - series 2 | 0.0000000000000000 | neg        | 0.019290123456790  | UCAA2000 |
| 18-11-2013 - series 2 | 0.0000000000000000 | neg        | 0.002576950608447  | UCAA2000 |
| 18-11-2013 - series 2 | 0.0000000000000000 | neg        | 0.026223366892999  | UCAA2000 |
| 18-11-2013 - series 2 | 0.0271703788610555 | neg        | 0.045861451590690  | UCAA2000 |
| 18-11-2013 - series 2 | 0.0000000000000000 | neg        | 0.018487705675726  | UCAA2000 |
| 18-11-2013 - series 3 | 0.0000000000000000 | neg        | 0.003398248594955  | UCAA2000 |
| 18-11-2013 - series 3 | 0.0000000000000000 | neg        | 0.025297619047619  | UCAA2000 |
| 18-11-2013 - series 3 | 0.0000000000000000 | neg        | 0.016313364055300  | UCAA2000 |
| 18-11-2013 - series 3 | 1.3454785083899100 | pos        | 0.536162841056735  | UCAA2000 |
| 18-11-2013 - series 3 | 0.0000000000000000 | neg        | 0.022033448367401  | UCAA2000 |
| 18-11-2013 - series 3 | 0.0158069568412421 | neg        | 0.039101758793970  | UCAA2000 |
| 18-11-2013 - series 3 | 0.0361418482779056 | neg        | 0.050939876596355  | UCAA2000 |
| 18-11-2013 - series 3 | 0.0000000000000000 | neg        | 0.000739827373613  | UCAA2000 |
| 18-11-2013 - series 3 | 0.0000000000000000 | neg        | 0.016448099577684  | UCAA2000 |
| 18-11-2013 - series 3 | 0.0036038024473638 | neg        | 0.031026515568269  | UCAA2000 |
| 18-11-2013 - series 3 | 0.0000000000000000 | neg        | 0.024857104878373  | UCAA2000 |
| 18-11-2013 - series 3 | 0.0096294614611825 | neg        | 0.035182250396197  | UCAA2000 |
| 18-11-2013 - series 3 | 0.0000000000000000 | neg        | 0.014332807797047  | UCAA2000 |
| 18-11-2013 - series 3 | 0.0000000000000000 | neg        | 0.013972334777141  | UCAA2000 |
| 18-11-2013 - series 3 | 0.0000000000000000 | neg        | 0.023792862141358  | UCAA2000 |
| 18-11-2013 - series 3 | 0.0000000000000000 | neg        | 0.016268098259314  | UCAA2000 |
| 18-11-2013 - series 3 | 0.0000000000000000 | neg        | 0.025571443481891  | UCAA2000 |

18-11-2013 - series 3 0.0000000000000000 neg 0.012227928588897 UCAA2000

18-11-2013 - series 3 0.0122851806268044 neg 0.036896551724138 UCAA2000

18-11-2013 - series 3 0.0932149182576143 neg 0.080543933054393 UCAA2000

18-11-2013 - series 3 0.0228061239779167 neg 0.043317340644277 UCAA2000

18-11-2013 - series 3 0.0000000000000000 neg 0.007955355022560 UCAA2000

18-11-2013 - series 3 0.0000000000000000 neg 0.012349490583513 UCAA2000

18-11-2013 - series 3 0.0200968332759722 neg 0.041707798617966 UCAA2000

18-11-2013 - series 3 0.0000000000000000 neg 0.002878464818763 UCAA2000

18-11-2013 - series 3 0.0267401419713992 neg 0.045613056214256 UCAA2000

18-11-2013 - series 3 0.0749368307230638 neg 0.071428571428571 UCAA2000

18-11-2013 - series 3 0.0000000000000000 neg 0.013869625520111 UCAA2000

|                       |                     |     |                   |          |
|-----------------------|---------------------|-----|-------------------|----------|
| 18-11-2013 - series 3 | 0.0001596633952680  | neg | 0.028194993412385 | UCAA2000 |
| 18-11-2013 - series 3 | 0.0000000000000000  | neg | 0.015851294332307 | UCAA2000 |
| 18-11-2013 - series 3 | 0.0231248149056935  | neg | 0.043505052994824 | UCAA2000 |
| 18-11-2013 - series 3 | 0.0900931976472062  | neg | 0.079005524861879 | UCAA2000 |
| 18-11-2013 - series 3 | 0.0488747990619470  | neg | 0.057883369330454 | UCAA2000 |
| 18-11-2013 - series 3 | 0.0134766049471707  | neg | 0.037650323774283 | UCAA2000 |
| 18-11-2013 - series 3 | 0.0000000000000000  | neg | 0.013185654008439 | UCAA2000 |
| 18-11-2013 - series 3 | 0.0000000000000000  | neg | 0.003635537377869 | UCAA2000 |
| 19-11-2013 - series 1 | 0.0389960498617119  | neg | 0.036311810633288 | UCAA2000 |
| 18-11-2013 - series 3 | 0.0000000000000000  | neg | 0.003361721201255 | UCAA2000 |
| 19-11-2013 - series 1 | 23.1491771171693000 | pos | 2.784892086330940 | UCAA2000 |
| 19-11-2013 - series 1 | 0.0000000000000000  | neg | 0.012136697540722 | UCAA2000 |
| 19-11-2013 - series 1 | 0.0000000000000000  | neg | 0.003201970443350 | UCAA2000 |
| 19-11-2013 - series 1 | 0.0000000000000000  | neg | 0.009479571523367 | UCAA2000 |
| 19-11-2013 - series 1 | 0.0227536494612969  | neg | 0.028321863419799 | UCAA2000 |
| 19-11-2013 - series 1 | 0.0000000000000000  | neg | 0.010167768174886 | UCAA2000 |
| 19-11-2013 - series 1 | 0.0000000000000000  | neg | 0.008315764816116 | UCAA2000 |
| 19-11-2013 - series 1 | 0.0010180650407817  | neg | 0.014359194170596 | UCAA2000 |
| 19-11-2013 - series 1 | 0.0025809498927468  | neg | 0.015807777426494 | UCAA2000 |
| 19-11-2013 - series 1 | 0.0005248849538947  | neg | 0.013810741687980 | UCAA2000 |
| 19-11-2013 - series 1 | 0.0321377724656109  | neg | 0.033051498847041 | UCAA2000 |
| 19-11-2013 - series 1 | 0.0021252757296732  | neg | 0.015413070283601 | UCAA2000 |
| 19-11-2013 - series 1 | 0.0000000000000000  | neg | 0.010009008107297 | UCAA2000 |
| 19-11-2013 - series 1 | 0.0000000000000000  | neg | 0.012706480304956 | UCAA2000 |
| 19-11-2013 - series 1 | 0.0000000000000000  | neg | 0.011253657438668 | UCAA2000 |
| 19-11-2013 - series 1 | 0.0203664981650276  | neg | 0.027054108216433 | UCAA2000 |
| 19-11-2013 - series 1 | 0.0145937215602753  | neg | 0.023839051949842 | UCAA2000 |
| 19-11-2013 - series 1 | 0.0024221213588089  | neg | 0.015672091621459 | UCAA2000 |
| 19-11-2013 - series 1 | 0.0439924884982221  | neg | 0.038606403013183 | UCAA2000 |
| 19-11-2013 - series 1 | 0.0299976221477041  | neg | 0.032003459833496 | UCAA2000 |
| 19-11-2013 - series 1 | 8.8715173241824200  | pos | 1.466423637759020 | UCAA2000 |
| 19-11-2013 - series 1 | 0.0000324331711504  | neg | 0.013092432573972 | UCAA2000 |
| 19-11-2013 - series 1 | 0.0000000000000000  | neg | 0.012601478250333 | UCAA2000 |
| 19-11-2013 - series 1 | 0.0122109748740575  | neg | 0.022432956051800 | UCAA2000 |
| 19-11-2013 - series 1 | 0.0000000423273883  | neg | 0.013000520020801 | UCAA2000 |
| 19-11-2013 - series 1 | 2.2238498367370000  | pos | 0.540751240255138 | UCAA2000 |
| 19-11-2013 - series 1 | 0.0139626238121237  | neg | 0.023471929488408 | UCAA2000 |



|                       |                    |     |                   |          |
|-----------------------|--------------------|-----|-------------------|----------|
| 19-11-2013 - series 1 | 0.0000000000000000 | neg | 0.010648493238207 | UCAA2000 |
| 19-11-2013 - series 2 | 0.0033557082952934 | neg | 0.016445623342175 | UCAA2000 |
| 19-11-2013 - series 2 | 0.0109462872830286 | neg | 0.021662296203398 | UCAA2000 |
| 19-11-2013 - series 2 | 0.0002240870042999 | neg | 0.013417415805716 | UCAA2000 |
| 19-11-2013 - series 2 | 1.9948708908449500 | pos | 0.499256136870816 | UCAA2000 |
| 19-11-2013 - series 2 | 0.0000000000000000 | neg | 0.012556504269212 | UCAA2000 |
| 19-11-2013 - series 2 | 1.0426909257846300 | pos | 0.309978540772532 | UCAA2000 |
| 19-11-2013 - series 2 | 0.0000000000000000 | neg | 0.012062726176116 | UCAA2000 |
| 19-11-2013 - series 2 | 0.0000000000000000 | neg | 0.011633317822243 | UCAA2000 |
| 19-11-2013 - series 2 | 0.0115423265602087 | neg | 0.022027824620573 | UCAA2000 |
| 19-11-2013 - series 2 | 0.0000000000000000 | neg | 0.011176930814798 | UCAA2000 |
| 19-11-2013 - series 2 | 0.0000000000000000 | neg | 0.009644064426327 | UCAA2000 |
| 19-11-2013 - series 2 | 0.0000000000000000 | neg | 0.010760787689659 | UCAA2000 |
| 19-11-2013 - series 2 | 0.0000000000000000 | neg | 0.009739943508328 | UCAA2000 |
| 19-11-2013 - series 2 | 0.0419517630094191 | neg | 0.037676609105181 | UCAA2000 |
| 19-11-2013 - series 2 | 0.0118308269432805 | neg | 0.022203245089667 | UCAA2000 |
| 19-11-2013 - series 2 | 0.0160112899935510 | neg | 0.024651202602071 | UCAA2000 |
| 19-11-2013 - series 2 | 0.0000000000000000 | neg | 0.007419930496854 | UCAA2000 |
| 19-11-2013 - series 2 | 0.0000000000000000 | neg | 0.010780508840017 | UCAA2000 |
| 19-11-2013 - series 2 | 0.0000000000000000 | neg | 0.009192645883293 | UCAA2000 |
| 19-11-2013 - series 2 | 0.0000000000000000 | neg | 0.004379149597401 | UCAA2000 |
| 19-11-2013 - series 2 | 0.0000000000000000 | neg | 0.002100375856732 | UCAA2000 |
| 19-11-2013 - series 2 | 0.0333001073957288 | neg | 0.033614167812930 | UCAA2000 |
| 19-11-2013 - series 2 | 0.0000000000000000 | neg | 0.011548677676406 | UCAA2000 |

|                       |                     |     |                   |          |
|-----------------------|---------------------|-----|-------------------|----------|
| 19-11-2013 - series 2 | 39.5512718162793000 | pos | 3.854007633587790 | UCAA2000 |
| 19-11-2013 - series 2 | 0.0416388799094477  | neg | 0.037533173259194 | UCAA2000 |
| 19-11-2013 - series 2 | 0.0000000000000000  | neg | 0.011442956860053 | UCAA2000 |
| 19-11-2013 - series 2 | 0.0000000000000000  | neg | 0.008167932696235 | UCAA2000 |
| 19-11-2013 - series 2 | 0.0098397586910540  | neg | 0.020971733750163 | UCAA2000 |
| 19-11-2013 - series 2 | 0.0223327194766444  | neg | 0.028100545411430 | UCAA2000 |
| 19-11-2013 - series 2 | 0.0041985613652705  | neg | 0.017103509551311 | UCAA2000 |
| 19-11-2013 - series 2 | 0.0000000000000000  | neg | 0.005526631958350 | UCAA2000 |
| 19-11-2013 - series 2 | 0.0086463152001041  | neg | 0.020207344930592 | UCAA2000 |
| 19-11-2013 - series 2 | 0.0000000000000000  | neg | 0.009479694064419 | UCAA2000 |
| 19-11-2013 - series 2 | 0.0237538112936708  | neg | 0.028844136773652 | UCAA2000 |
| 19-11-2013 - series 2 | 0.0263029049563650  | neg | 0.030153846153846 | UCAA2000 |
| 19-11-2013 - series 2 | 0.0000000000000000  | neg | 0.011403808872163 | UCAA2000 |
| 19-11-2013 - series 2 | 0.0041861103163570  | neg | 0.017094017094017 | UCAA2000 |
| 19-11-2013 - series 3 | 11.5777290945886000 | pos | 1.762711864406780 | UCAA2000 |
| 19-11-2013 - series 3 | 0.0461390792503246  | neg | 0.039574126155082 | UCAA2000 |
| 19-11-2013 - series 3 | 0.0027242677558681  | neg | 0.015928639694170 | UCAA2000 |
| 19-11-2013 - series 3 | 0.0356976208271387  | neg | 0.034761235955056 | UCAA2000 |
| 19-11-2013 - series 3 | 0.0291293354809407  | neg | 0.031573565128467 | UCAA2000 |
| 19-11-2013 - series 3 | 0.0000000000000000  | neg | 0.010730765103552 | UCAA2000 |
| 19-11-2013 - series 3 | 0.0395527939841109  | neg | 0.036570598207799 | UCAA2000 |
| 19-11-2013 - series 3 | 0.0000000000000000  | neg | 0.011095084877399 | UCAA2000 |
| 19-11-2013 - series 3 | 0.0007532668724484  | neg | 0.014074595355384 | UCAA2000 |
| 19-11-2013 - series 3 | 0.1663895172578620  | neg | 0.085051212239077 | UCAA2000 |
| 19-11-2013 - series 3 | 0.0000000000000000  | neg | 0.010223903486351 | UCAA2000 |
| 19-11-2013 - series 3 | 0.0052692840055884  | neg | 0.017898693395382 | UCAA2000 |
| 19-11-2013 - series 3 | 0.0000608365143680  | neg | 0.013150973172015 | UCAA2000 |
| 19-11-2013 - series 3 | 0.0000347653216274  | neg | 0.013097576948265 | UCAA2000 |
| 19-11-2013 - series 3 | 0.0000000000000000  | neg | 0.012242899118511 | UCAA2000 |
| 19-11-2013 - series 3 | 0.0763073194572477  | neg | 0.052311259237792 | UCAA2000 |

|                       |                     |            |                   |          |
|-----------------------|---------------------|------------|-------------------|----------|
| 19-11-2013 - series 3 | 0.2755098431047890  | indecisive | 0.119528283030182 | UCAA2000 |
| 19-11-2013 - series 3 | 0.0186499944475388  | neg        | 0.026122148638705 | UCAA2000 |
| 19-11-2013 - series 3 | 0.0338228979626124  | neg        | 0.033865814696486 | UCAA2000 |
| 19-11-2013 - series 3 | 0.0000000000000000  | neg        | 0.012805736970163 | UCAA2000 |
| 19-11-2013 - series 3 | 0.0000000000000000  | neg        | 0.012809017548354 | UCAA2000 |
| 19-11-2013 - series 3 | 2.0018079634326700  | pos        | 0.500531672489746 | UCAA2000 |
| 19-11-2013 - series 3 | 0.0000000000000000  | neg        | 0.011379153390988 | UCAA2000 |
| 19-11-2013 - series 3 | 0.0103467947734699  | neg        | 0.021290185224612 | UCAA2000 |
| 19-11-2013 - series 3 | 0.0000000000000000  | neg        | 0.010632642211590 | UCAA2000 |
| 19-11-2013 - series 3 | 0.0015394843508045  | neg        | 0.014876524843797 | UCAA2000 |
| 19-11-2013 - series 3 | 0.0000000000000000  | neg        | 0.005550660792952 | UCAA2000 |
| 19-11-2013 - series 3 | 0.0000000000000000  | neg        | 0.010440593025684 | UCAA2000 |
| 19-11-2013 - series 3 | 0.5920148998665210  | pos        | 0.205338299193048 | UCAA2000 |
| 19-11-2013 - series 3 | 0.0000000000000000  | neg        | 0.012016342225427 | UCAA2000 |
| 19-11-2013 - series 3 | 0.0001996778453812  | neg        | 0.013381506757661 | UCAA2000 |
| 19-11-2013 - series 3 | 44.0436386817185000 | pos        | 4.098576700052710 | UCAA2000 |
| 19-11-2013 - series 3 | 0.0022558755816020  | neg        | 0.015527950310559 | UCAA2000 |
| 19-11-2013 - series 3 | 0.0000000000000000  | neg        | 0.008371470030137 | UCAA2000 |
| 19-11-2013 - series 3 | 0.0000000000000000  | neg        | 0.012217470983506 | UCAA2000 |
| 19-11-2013 - series 3 | 0.0000000000000000  | neg        | 0.011357183418512 | UCAA2000 |
| 19-11-2013 - series 3 | 0.0000000000000000  | neg        | 0.011349449551697 | UCAA2000 |
| 20-11-2013 - series 1 | 0.0372197822756346  | neg        | 0.030440479790344 | UCAA2000 |
| 20-11-2013 - series 1 | 0.0000000000000000  | neg        | 0.005988621618924 | UCAA2000 |
| 20-11-2013 - series 1 | 0.0083550809008777  | neg        | 0.018126148193509 | UCAA2000 |
| 20-11-2013 - series 1 | 0.0087834157197497  | neg        | 0.018340611353712 | UCAA2000 |
| 20-11-2013 - series 1 | 0.0159902689597999  | neg        | 0.021727202896960 | UCAA2000 |
| 20-11-2013 - series 1 | 0.0344741366750521  | neg        | 0.029379157427938 | UCAA2000 |
| 20-11-2013 - series 1 | 0.0232400725440094  | neg        | 0.024856596558317 | UCAA2000 |
| 20-11-2013 - series 1 | 0.0167845652511755  | neg        | 0.022080963532954 | UCAA2000 |
| 20-11-2013 - series 1 | 0.0000000000000000  | neg        | 0.010593220338983 | UCAA2000 |
| 20-11-2013 - series 1 | 0.1078873682890080  | neg        | 0.054690018265821 | UCAA2000 |
| 20-11-2013 - series 1 | 0.0255998086319531  | neg        | 0.025834476451760 | UCAA2000 |
| 20-11-2013 - series 1 | 0.0154907566920708  | neg        | 0.021503109518288 | UCAA2000 |
| 20-11-2013 - series 1 | 0.0000000000000000  | neg        | 0.002803738317757 | UCAA2000 |
| 20-11-2013 - series 1 | 0.0354846711018904  | neg        | 0.029771499004456 | UCAA2000 |

|                       |                    |            |                   |          |
|-----------------------|--------------------|------------|-------------------|----------|
| 20-11-2013 - series 1 | 0.0392913166257806 | neg        | 0.031231813773036 | UCAA2000 |
| 20-11-2013 - series 1 | 0.0939296027780694 | neg        | 0.050221298888989 | UCAA2000 |
| 20-11-2013 - series 1 | 0.0667968976424379 | neg        | 0.041157294213529 | UCAA2000 |
| 20-11-2013 - series 1 | 0.0056988112674396 | neg        | 0.016745973645681 | UCAA2000 |
| 20-11-2013 - series 1 | 0.0000000000000000 | neg        | 0.009140767824497 | UCAA2000 |
| 20-11-2013 - series 1 | 0.0000000000000000 | neg        | 0.009711566475673 | UCAA2000 |
| 20-11-2013 - series 1 | 0.0119012976977321 | neg        | 0.019850802882792 | UCAA2000 |
| 20-11-2013 - series 1 | 0.0127714733189169 | neg        | 0.020258767449779 | UCAA2000 |
| 20-11-2013 - series 1 | 0.3613482873840780 | indecisive | 0.124934328044552 | UCAA2000 |
| 20-11-2013 - series 1 | 0.0000000000000000 | neg        | 0.011178180192265 | UCAA2000 |
| 20-11-2013 - series 1 | 0.0337387976122274 | neg        | 0.029092350376536 | UCAA2000 |
| 20-11-2013 - series 1 | 0.0782399719839854 | neg        | 0.045049229054431 | UCAA2000 |

|                       |                    |     |                   |          |
|-----------------------|--------------------|-----|-------------------|----------|
| 15-11-2013 - series 2 | 0.1022388358214630 | neg | 0.014120304998588 | UCAA2000 |
| 15-11-2013 - series 2 | 0.1139969344559710 | neg | 0.014898688915375 | UCAA2000 |
| 15-11-2013 - series 2 | 0.1890411334963520 | neg | 0.020907247845920 | UCAA2000 |
| 15-11-2013 - series 2 | 0.1911238230036300 | neg | 0.021097046413502 | UCAA2000 |
| 15-11-2013 - series 2 | 0.0000000000000000 | neg | 0.009888262632256 | UCAA2000 |

|                       |                      |            |                   |          |
|-----------------------|----------------------|------------|-------------------|----------|
| 16-11-2013 - series 1 | 0.3967493541926330   | indecisive | 0.123591421301345 | UCAA2000 |
| 16-11-2013 - series 1 | 0.0000000000000000   | neg        | 0.012236503856041 | UCAA2000 |
| 16-11-2013 - series 1 | 0.0000000000000000   | neg        | 0.001438848920863 | UCAA2000 |
| 16-11-2013 - series 1 | 0.0000000000000000   | neg        | 0.010551463268963 | UCAA2000 |
| 16-11-2013 - series 1 | 0.0092896590393694   | neg        | 0.025998258489862 | UCAA2000 |
| 16-11-2013 - series 1 | 0.0000000000000000   | neg        | 0.001047419539135 | UCAA2000 |
| 16-11-2013 - series 1 | 0.0050300291320118   | neg        | 0.024345867267371 | UCAA2000 |
| 16-11-2013 - series 1 | 0.0000000000000000   | neg        | 0.016129032258065 | UCAA2000 |
| 16-11-2013 - series 1 | 0.0000000000000000   | neg        | 0.020940649496081 | UCAA2000 |
| 16-11-2013 - series 1 | 0.0040906739642143   | neg        | 0.023959978936282 | UCAA2000 |
| 16-11-2013 - series 1 | 0.0000000000000000   | neg        | 0.019733470015377 | UCAA2000 |
| 16-11-2013 - series 1 | 0.0000000000000000   | neg        | 0.017130387343153 | UCAA2000 |
| 16-11-2013 - series 1 | 0.0633323956411304   | neg        | 0.043123991083096 | UCAA2000 |
| 16-11-2013 - series 1 | 0.0000000000000000   | neg        | 0.001124567474048 | UCAA2000 |
| 16-11-2013 - series 1 | 0.0000000000000000   | neg        | 0.016518557239937 | UCAA2000 |
| 16-11-2013 - series 1 | 0.0932284018550548   | neg        | 0.051492770207011 | UCAA2000 |
| 16-11-2013 - series 1 | 0.0000000000000000   | neg        | 0.008833922261484 | UCAA2000 |
| 16-11-2013 - series 1 | 0.5104903062952080   | pos        | 0.147518035964251 | UCAA2000 |
| 16-11-2013 - series 1 | 0.0147173233134440   | neg        | 0.027962841324951 | UCAA2000 |
| 16-11-2013 - series 1 | 0.0000000000000000   | neg        | 0.004264825345248 | UCAA2000 |
| 16-11-2013 - series 1 | 0.0000000000000000   | neg        | 0.014013150803061 | UCAA2000 |
| 16-11-2013 - series 1 | 0.7481991438721470   | pos        | 0.194359756097561 | UCAA2000 |
| 16-11-2013 - series 1 | 0.0000000000000000   | neg        | 0.000363901018923 | UCAA2000 |
| 16-11-2013 - series 1 | 0.0390845697997283   | neg        | 0.035912240184758 | UCAA2000 |
| 16-11-2013 - series 1 | 0.2077128356853400   | indecisive | 0.080662341435073 | UCAA2000 |
| 16-11-2013 - series 1 | 0.0190528209195208   | neg        | 0.029461077844311 | UCAA2000 |
| 16-11-2013 - series 1 | 0.0808907676584062   | neg        | 0.048094512195122 | UCAA2000 |
| 16-11-2013 - series 1 | 0.0000000000000000   | neg        | 0.016765053128690 | UCAA2000 |
| 16-11-2013 - series 1 | 0.0000000000000000   | neg        | 0.014722256587901 | UCAA2000 |
| 16-11-2013 - series 1 | 30.3243593343285000  | pos        | 1.895593869731800 | UCAA2000 |
| 16-11-2013 - series 1 | 0.0799647340977021   | neg        | 0.047836538461539 | UCAA2000 |
| 16-11-2013 - series 1 | 0.0594640073125939   | neg        | 0.042003989205679 | UCAA2000 |
| 16-11-2013 - series 1 | 0.0856492716602525   | neg        | 0.049413526328924 | UCAA2000 |
| 16-11-2013 - series 1 | 999.0000000000000000 | pos        | 6.086185819070900 | UCAA2000 |
| 16-11-2013 - series 1 | 0.2607663319339040   | indecisive | 0.093212185996793 | UCAA2000 |
| 16-11-2013 - series 1 | 0.0219672322666441   | neg        | 0.030442035029191 | UCAA2000 |
| 16-11-2013 - series 1 | 0.1391559957576140   | neg        | 0.063627299918427 | UCAA2000 |
| 16-11-2013 - series 2 | 0.0000000000000000   | neg        | 0.006193748185425 | UCAA2000 |
| 16-11-2013 - series 2 | 0.0000000000000000   | neg        | 0.003715978708446 | UCAA2000 |
| 16-11-2013 - series 2 | 999.0000000000000000 | pos        | 4.115997450605480 | UCAA2000 |
| 16-11-2013 - series 2 | 0.0000000000000000   | neg        | 0.021592574499267 | UCAA2000 |
| 16-11-2013 - series 2 | 0.0000000000000000   | neg        | 0.018336483931947 | UCAA2000 |
| 16-11-2013 - series 2 | 0.0000000000000000   | neg        | 0.003226314132830 | UCAA2000 |

|                       |                      |     |                   |          |
|-----------------------|----------------------|-----|-------------------|----------|
| 16-11-2013 - series 2 | 0.0000000000000000   | neg | 0.011475566606101 | UCAA2000 |
| 16-11-2013 - series 2 | 0.0000000000000000   | neg | 0.016832440703902 | UCAA2000 |
| 16-11-2013 - series 2 | 0.0293687450090812   | neg | 0.032860040567951 | UCAA2000 |
| 16-11-2013 - series 2 | 0.0000000000000000   | neg | 0.020334695466044 | UCAA2000 |
| 16-11-2013 - series 2 | 0.0000000000000000   | neg | 0.015547106041403 | UCAA2000 |
| 16-11-2013 - series 2 | 0.9914039033183790   | pos | 0.238916506036319 | UCAA2000 |
| 16-11-2013 - series 2 | 0.5461321910039220   | pos | 0.154791419639970 | UCAA2000 |
| 16-11-2013 - series 2 | 999.0000000000000000 | pos | 2.663682277318640 | UCAA2000 |
| 16-11-2013 - series 2 | 999.0000000000000000 | pos | 4.688373951258490 | UCAA2000 |
| 16-11-2013 - series 2 | 0.0448788009454207   | neg | 0.037681420715767 | UCAA2000 |
| 16-11-2013 - series 2 | 6.0327039445648800   | pos | 0.850263492640378 | UCAA2000 |
| 16-11-2013 - series 2 | 0.0006889656244021   | neg | 0.022416325268609 | UCAA2000 |
| 16-11-2013 - series 2 | 0.0854643779855585   | neg | 0.049362477231330 | UCAA2000 |
| 16-11-2013 - series 2 | 0.0000000000000000   | neg | 0.010844370860927 | UCAA2000 |
| 16-11-2013 - series 2 | 0.0000000000000000   | neg | 0.004940267672685 | UCAA2000 |
| 16-11-2013 - series 2 | 0.0000000000000000   | neg | 0.008666597055445 | UCAA2000 |
| 16-11-2013 - series 2 | 0.0000000000000000   | neg | 0.006470537485981 | UCAA2000 |
| 16-11-2013 - series 2 | 999.0000000000000000 | pos | 5.124051593323220 | UCAA2000 |
| 16-11-2013 - series 2 | 0.0000000000000000   | neg | 0.004729288975864 | UCAA2000 |
| 16-11-2013 - series 2 | 0.0264390642020533   | neg | 0.031914137465349 | UCAA2000 |
| 16-11-2013 - series 2 | 0.0510956086563055   | neg | 0.039544753086420 | UCAA2000 |
| 16-11-2013 - series 2 | 0.0229513844016500   | neg | 0.030769230769231 | UCAA2000 |
| 16-11-2013 - series 2 | 0.0000000000000000   | neg | 0.004045492710480 | UCAA2000 |
| 16-11-2013 - series 2 | 0.0195326801318832   | neg | 0.029623905203503 | UCAA2000 |
| 16-11-2013 - series 2 | 0.0145134033856537   | neg | 0.027891030392884 | UCAA2000 |
| 16-11-2013 - series 2 | 0.0486063022786621   | neg | 0.038802660753880 | UCAA2000 |
| 16-11-2013 - series 2 | 0.0071632175718319   | neg | 0.025189816882537 | UCAA2000 |
| 16-11-2013 - series 2 | 0.0615006816522292   | neg | 0.042594902869364 | UCAA2000 |
| 16-11-2013 - series 2 | 0.0171341107071949   | neg | 0.028804347826087 | UCAA2000 |
| 16-11-2013 - series 2 | 0.0000000000000000   | neg | 0.008826041567809 | UCAA2000 |
| 16-11-2013 - series 2 | 0.0316659736323192   | neg | 0.033592749482810 | UCAA2000 |
| 18-11-2013 - series 1 | 0.0000000000000000   | neg | 0.023307436182020 | UCAA2000 |
| 18-11-2013 - series 1 | 0.0084653002532038   | neg | 0.034413159753759 | UCAA2000 |
| 18-11-2013 - series 1 | 25.2770596123226000  | pos | 3.320571254937710 | UCAA2000 |

|                       |                    |            |                   |          |
|-----------------------|--------------------|------------|-------------------|----------|
| 14-11-2013 - series 1 | 0.0457099508833964 | neg        | 0.029010733971570 | UCAA2000 |
| 14-11-2013 - series 1 | 0.0000000000000000 | neg        | 0.018878610534265 | UCAA2000 |
| 14-11-2013 - series 1 | 0.0000000000000000 | neg        | 0.005642279480910 | UCAA2000 |
| 14-11-2013 - series 1 | 0.0000000000000000 | neg        | 0.005754685958566 | UCAA2000 |
| 14-11-2013 - series 1 | 0.2406862004400310 | indecisive | 0.071218939542164 | UCAA2000 |
| 14-11-2013 - series 1 | 0.0000000000000000 | neg        | 0.014517639712769 | UCAA2000 |
| 14-11-2013 - series 1 | 0.0000000000000000 | neg        | 0.013421017313112 | UCAA2000 |
| 14-11-2013 - series 1 | 0.1151483070106410 | neg        | 0.043718166383701 | UCAA2000 |
| 14-11-2013 - series 1 | 0.0000000000000000 | neg        | 0.006144971156258 | UCAA2000 |
| 14-11-2013 - series 1 | 0.0000000000000000 | neg        | 0.016405828386400 | UCAA2000 |
| 14-11-2013 - series 1 | 0.0000000000000000 | neg        | 0.008796927270475 | UCAA2000 |
| 14-11-2013 - series 1 | 0.0202104801800264 | neg        | 0.023827824750192 | UCAA2000 |
| 14-11-2013 - series 1 | 0.0000000000000000 | neg        | 0.016963528413910 | UCAA2000 |
| 14-11-2013 - series 1 | 0.0480045441914888 | neg        | 0.029485570890841 | UCAA2000 |
| 14-11-2013 - series 1 | 7.2536206745694100 | pos        | 1.455952171619480 | UCAA2000 |
| 14-11-2013 - series 1 | 0.0713363019999853 | neg        | 0.034366976101126 | UCAA2000 |
| 14-11-2013 - series 1 | 0.0679745476460086 | neg        | 0.033658420551855 | UCAA2000 |
| 14-11-2013 - series 1 | 0.3050149642023980 | indecisive | 0.085535378835316 | UCAA2000 |
| 14-11-2013 - series 1 | 0.0000000000000000 | neg        | 0.000104865771812 | UCAA2000 |
| 14-11-2013 - series 1 | 0.0000000000000000 | neg        | 0.016733524355301 | UCAA2000 |
| 15-11-2013 - series 1 | 0.0000000000000000 | neg        | 0.030704697986577 | UCAA2000 |
| 15-11-2013 - series 1 | 0.0000000000000000 | neg        | 0.012545477355413 | UCAA2000 |
| 15-11-2013 - series 1 | 0.0000000000000000 | neg        | 0.012020342117430 | UCAA2000 |
| 15-11-2013 - series 1 | 0.0000000000000000 | neg        | 0.032486845115534 | UCAA2000 |
| 15-11-2013 - series 1 | 1.7973089377137200 | pos        | 0.366280174871697 | UCAA2000 |
| 15-11-2013 - series 1 | 0.4315974032894820 | pos        | 0.130730659025788 | UCAA2000 |
| 15-11-2013 - series 1 | 0.0000000000000000 | neg        | 0.018214936247723 | UCAA2000 |
| 15-11-2013 - series 1 | 0.0000000000000000 | neg        | 0.001461835647906 | UCAA2000 |
| 15-11-2013 - series 1 | 0.0000000000000000 | neg        | 0.001830065359477 | UCAA2000 |
| 15-11-2013 - series 1 | 0.0000000000000000 | neg        | 0.020817732514602 | UCAA2000 |
| 15-11-2013 - series 1 | 0.0000000000000000 | neg        | 0.019908466819222 | UCAA2000 |
| 15-11-2013 - series 1 | 0.0514693638134125 | neg        | 0.047218155197657 | UCAA2000 |
| 15-11-2013 - series 1 | 0.0000000000000000 | neg        | 0.006663314055821 | UCAA2000 |
| 15-11-2013 - series 1 | 0.0000000000000000 | neg        | 0.001787924632100 | UCAA2000 |
| 15-11-2013 - series 1 | 0.0000000000000000 | neg        | 0.027216748768473 | UCAA2000 |
| 15-11-2013 - series 1 | 0.0000000000000000 | neg        | 0.003453237410072 | UCAA2000 |

|                       |                      |            |                   |          |
|-----------------------|----------------------|------------|-------------------|----------|
| 15-11-2013 - series 1 | 0.0982123352953936   | neg        | 0.058664002283757 | UCAA2000 |
| 15-11-2013 - series 1 | 0.0000000000000000   | neg        | 0.032538303585532 | UCAA2000 |
| 15-11-2013 - series 1 | 0.0000000000000000   | neg        | 0.027772634697278 | UCAA2000 |
| 15-11-2013 - series 1 | 0.0257351340148334   | neg        | 0.040531561461794 | UCAA2000 |
| 15-11-2013 - series 1 | 0.0000000000000000   | neg        | 0.012815583749840 | UCAA2000 |
| 15-11-2013 - series 1 | 0.0467612579130007   | neg        | 0.046022353714661 | UCAA2000 |
| 15-11-2013 - series 1 | 0.0000000000000000   | neg        | 0.025819777949910 | UCAA2000 |
| 15-11-2013 - series 1 | 0.0658754525861155   | neg        | 0.050820256776034 | UCAA2000 |
| 15-11-2013 - series 1 | 0.0000000000000000   | neg        | 0.001932633903920 | UCAA2000 |
| 15-11-2013 - series 1 | 0.0000000000000000   | neg        | 0.004174045029092 | UCAA2000 |
| 15-11-2013 - series 1 | 3.2800552330354700   | pos        | 0.568209500609013 | UCAA2000 |
| 15-11-2013 - series 1 | 0.0000000000000000   | neg        | 0.000586510263930 | UCAA2000 |
| 15-11-2013 - series 1 | 999.0000000000000000 | pos        | 2.650640024976580 | UCAA2000 |
| 15-11-2013 - series 1 | 2.1084158431223300   | pos        | 0.412267890673899 | UCAA2000 |
| 15-11-2013 - series 2 | 0.0346823162694182   | neg        | 0.010734269727076 | UCAA2000 |
| 15-11-2013 - series 2 | 0.0000000000000000   | neg        | 0.001271006919927 | UCAA2000 |
| 15-11-2013 - series 2 | 0.7172759700631330   | pos        | 0.092414133926365 | UCAA2000 |
| 15-11-2013 - series 2 | 0.3781911739321170   | indecisive | 0.042049934296978 | UCAA2000 |
| 15-11-2013 - series 2 | 0.4493819718223390   | pos        | 0.051620770246926 | UCAA2000 |
| 15-11-2013 - series 2 | 0.3826652052363870   | indecisive | 0.042629939334317 | UCAA2000 |
| 15-11-2013 - series 2 | 0.2963756835668990   | indecisive | 0.032029339853301 | UCAA2000 |
| 15-11-2013 - series 2 | 1.7705066857184600   | pos        | 0.262119967132293 | UCAA2000 |
| 15-11-2013 - series 2 | 0.2991679644616380   | indecisive | 0.032351566152408 | UCAA2000 |
| 15-11-2013 - series 2 | 0.1477519773723510   | neg        | 0.017391304347826 | UCAA2000 |
| 15-11-2013 - series 2 | 0.0000000000000000   | neg        | 0.002357182473655 | UCAA2000 |
| 15-11-2013 - series 2 | 0.0000000000000000   | neg        | 0.004054836841089 | UCAA2000 |
| 15-11-2013 - series 2 | 0.1718440582826830   | neg        | 0.019384540828689 | UCAA2000 |
| 15-11-2013 - series 2 | 0.2306321626234700   | indecisive | 0.024905023216547 | UCAA2000 |
| 15-11-2013 - series 2 | 0.1185265749429000   | neg        | 0.015211439002130 | UCAA2000 |
| 15-11-2013 - series 2 | 0.1061853136444570   | neg        | 0.014376078205865 | UCAA2000 |
| 15-11-2013 - series 2 | 0.3946009697788590   | indecisive | 0.044192091941442 | UCAA2000 |
| 15-11-2013 - series 2 | 0.0000000000000000   | neg        | 0.008316008316008 | UCAA2000 |
| 15-11-2013 - series 2 | 0.0000000000000000   | neg        | 0.006161007667032 | UCAA2000 |
| 15-11-2013 - series 2 | 999.0000000000000000 | pos        | 2.368453105968330 | UCAA2000 |
| 15-11-2013 - series 2 | 0.2421888141324120   | indecisive | 0.026089579248982 | UCAA2000 |
| 15-11-2013 - series 2 | 999.0000000000000000 | pos        | 2.124483775811210 | UCAA2000 |
| 15-11-2013 - series 2 | 0.0000000000000000   | neg        | 0.005244308007163 | UCAA2000 |
| 15-11-2013 - series 2 | 0.3915709294094550   | indecisive | 0.043793503480278 | UCAA2000 |
| 15-11-2013 - series 2 | 0.0000000000000000   | neg        | 0.009987016878059 | UCAA2000 |
| 15-11-2013 - series 2 | 0.0876053789846014   | neg        | 0.013222266296443 | UCAA2000 |
| 14-11-2013 - series 1 | 0.5915010272883980   | pos        | 0.150047483380817 | UCAA2000 |



|                       |                      |     |                   |          |
|-----------------------|----------------------|-----|-------------------|----------|
| 15-11-2013 - series 2 | 0.1071965682075850   | neg | 0.014442518775274 | UCAA2000 |
| 15-11-2013 - series 2 | 0.0000000000000000   | neg | 0.008460698689956 | UCAA2000 |
| 15-11-2013 - series 2 | 2.6362782689059500   | pos | 0.369640576537128 | UCAA2000 |
| 15-11-2013 - series 2 | 999.0000000000000000 | pos | 3.617086453369640 | UCAA2000 |
| 15-11-2013 - series 2 | 0.5545989034291720   | pos | 0.066902698083262 | UCAA2000 |

|                       |                    |     |                   |          |
|-----------------------|--------------------|-----|-------------------|----------|
| 20-11-2013 - series 1 | 0.0000000000000000 | neg | 0.009357162908206 | UCAA2000 |
| 20-11-2013 - series 1 | 0.1324284142900730 | neg | 0.062300918118793 | UCAA2000 |
| 20-11-2013 - series 1 | 0.0314893743883874 | neg | 0.028207819469955 | UCAA2000 |
| 20-11-2013 - series 1 | 0.1057362412777250 | neg | 0.054008567931457 | UCAA2000 |
| 20-11-2013 - series 1 | 0.0074409156842547 | neg | 0.017661603673614 | UCAA2000 |
| 20-11-2013 - series 1 | 0.0139495125984820 | neg | 0.020803183791606 | UCAA2000 |
| 20-11-2013 - series 1 | 0.0568452950055024 | neg | 0.037672666387610 | UCAA2000 |
| 20-11-2013 - series 1 | 0.0147823735792190 | neg | 0.021183053557154 | UCAA2000 |

|                       |                     |            |                   |          |
|-----------------------|---------------------|------------|-------------------|----------|
| 20-11-2013 - series 1 | 0.0956368291056169  | neg        | 0.050774096886965 | UCAA2000 |
| 20-11-2013 - series 1 | 0.0336920370398218  | neg        | 0.029074074074074 | UCAA2000 |
| 20-11-2013 - series 1 | 17.8673784063627000 | pos        | 2.436565364206460 | UCAA2000 |
| 20-11-2013 - series 2 | 0.1052627431089740  | neg        | 0.053858229682406 | UCAA2000 |
| 20-11-2013 - series 2 | 0.1414129299025280  | neg        | 0.065020231617134 | UCAA2000 |
| 20-11-2013 - series 2 | 0.8166854704320990  | pos        | 0.230290456431535 | UCAA2000 |
| 20-11-2013 - series 2 | 0.0003019885698340  | neg        | 0.013336889837290 | UCAA2000 |
| 20-11-2013 - series 2 | 0.0000000000000000  | neg        | 0.011866143076660 | UCAA2000 |
| 20-11-2013 - series 2 | 0.0000000000000000  | neg        | 0.012143290831815 | UCAA2000 |
| 20-11-2013 - series 2 | 0.0000000000000000  | neg        | 0.006578947368421 | UCAA2000 |
| 20-11-2013 - series 2 | 0.0520588607928903  | neg        | 0.035957759657800 | UCAA2000 |
| 20-11-2013 - series 2 | 0.0000000000000000  | neg        | 0.002668523030514 | UCAA2000 |
| 20-11-2013 - series 2 | 0.1488707157564670  | neg        | 0.067253299811439 | UCAA2000 |
| 20-11-2013 - series 2 | 0.1137122513202190  | neg        | 0.056522940851299 | UCAA2000 |
| 20-11-2013 - series 2 | 0.0022771324405132  | neg        | 0.014765724915708 | UCAA2000 |
| 20-11-2013 - series 2 | 0.0587435561589458  | neg        | 0.038345410628019 | UCAA2000 |
| 20-11-2013 - series 2 | 0.0304408054871042  | neg        | 0.027791612710429 | UCAA2000 |
| 20-11-2013 - series 2 | 0.0255707077956853  | neg        | 0.025822519334120 | UCAA2000 |
| 20-11-2013 - series 2 | 0.0010016498443102  | neg        | 0.013900472616069 | UCAA2000 |
| 20-11-2013 - series 2 | 0.0014516809110832  | neg        | 0.014220705346985 | UCAA2000 |
| 20-11-2013 - series 2 | 0.0430989239284409  | neg        | 0.032666991711360 | UCAA2000 |
| 20-11-2013 - series 2 | 0.0042521098380885  | neg        | 0.015946420028704 | UCAA2000 |
| 20-11-2013 - series 2 | 0.1425789970612450  | neg        | 0.065370789508721 | UCAA2000 |
| 20-11-2013 - series 2 | 0.0003737349594822  | neg        | 0.013401232913428 | UCAA2000 |
| 20-11-2013 - series 2 | 0.0018804244972857  | neg        | 0.014509246088194 | UCAA2000 |
| 20-11-2013 - series 2 | 0.2167746141288700  | indecisive | 0.086760563380282 | UCAA2000 |
| 20-11-2013 - series 2 | 0.0000000000000000  | neg        | 0.012210012210012 | UCAA2000 |
| 20-11-2013 - series 2 | 0.0066237618228187  | neg        | 0.017237569060774 | UCAA2000 |
| 20-11-2013 - series 2 | 0.0017078508326299  | neg        | 0.014394702749388 | UCAA2000 |
| 20-11-2013 - series 2 | 0.0029545290459281  | neg        | 0.015186028853455 | UCAA2000 |
| 20-11-2013 - series 2 | 0.0073756663231959  | neg        | 0.017628065276202 | UCAA2000 |
| 20-11-2013 - series 2 | 0.0399078317191590  | neg        | 0.031465848042978 | UCAA2000 |
| 20-11-2013 - series 2 | 0.2845494575522700  | indecisive | 0.105109900432087 | UCAA2000 |
| 20-11-2013 - series 2 | 0.0894913242612466  | neg        | 0.048775468203334 | UCAA2000 |
| 20-11-2013 - series 2 | 0.0570158040452202  | neg        | 0.037733260153677 | UCAA2000 |
| 20-11-2013 - series 2 | 0.1090003857413800  | neg        | 0.055041628122109 | UCAA2000 |
| 20-11-2013 - series 2 | 0.0004192259293353  | neg        | 0.013440860215054 | UCAA2000 |
| 20-11-2013 - series 2 | 0.0000000000000000  | neg        | 0.008495478213209 | UCAA2000 |
| 20-11-2013 - series 2 | 0.1846405162900520  | neg        | 0.077696843565730 | UCAA2000 |

|                       |                    |            |                   |          |
|-----------------------|--------------------|------------|-------------------|----------|
| 20-11-2013 - series 2 | 0.0000000000000000 | neg        | 0.003071410289224 | UCAA2000 |
| 20-11-2013 - series 3 | 0.0525330951364209 | neg        | 0.036128912417572 | UCAA2000 |
| 20-11-2013 - series 3 | 0.6726358613833640 | pos        | 0.198622417031935 | UCAA2000 |
| 20-11-2013 - series 3 | 0.1097559585504700 | neg        | 0.055279943302622 | UCAA2000 |
| 20-11-2013 - series 3 | 0.0001040385037443 | neg        | 0.013140604467806 | UCAA2000 |
| 20-11-2013 - series 3 | 0.0505719493005763 | neg        | 0.035419274092616 | UCAA2000 |
| 20-11-2013 - series 3 | 0.0000000000000000 | neg        | 0.010592098294672 | UCAA2000 |
| 20-11-2013 - series 3 | 0.3936163032437840 | indecisive | 0.133018230925051 | UCAA2000 |
| 20-11-2013 - series 3 | 0.0000000000000000 | neg        | 0.009720062208398 | UCAA2000 |
| 20-11-2013 - series 3 | 0.0074166459992199 | neg        | 0.017649135192376 | UCAA2000 |
| 20-11-2013 - series 3 | 0.0000000000000000 | neg        | 0.010052271813430 | UCAA2000 |
| 20-11-2013 - series 3 | 7.5876848420759800 | pos        | 1.292005053239490 | UCAA2000 |
| 20-11-2013 - series 3 | 0.0000000000000000 | neg        | 0.008677730773403 | UCAA2000 |
| 20-11-2013 - series 3 | 0.0000000000000000 | neg        | 0.009195095948827 | UCAA2000 |
| 20-11-2013 - series 3 | 0.0009264622786800 | neg        | 0.013844662882459 | UCAA2000 |
| 20-11-2013 - series 3 | 0.1396950873473660 | neg        | 0.064502819419612 | UCAA2000 |
| 20-11-2013 - series 3 | 0.0356147228113241 | neg        | 0.029821843532146 | UCAA2000 |
| 20-11-2013 - series 3 | 0.0055630315999784 | neg        | 0.016672642524202 | UCAA2000 |
| 20-11-2013 - series 3 | 0.0668159373306278 | neg        | 0.041163866020074 | UCAA2000 |
| 20-11-2013 - series 3 | 1.0307523482143800 | pos        | 0.275391849529781 | UCAA2000 |
| 20-11-2013 - series 3 | 0.0000000000000000 | neg        | 0.009575792396821 | UCAA2000 |
| 20-11-2013 - series 3 | 0.0000000000000000 | neg        | 0.010680337498665 | UCAA2000 |
| 20-11-2013 - series 3 | 0.0724139784511375 | neg        | 0.043081761006289 | UCAA2000 |
| 20-11-2013 - series 3 | 0.0652293693034280 | neg        | 0.040615058324496 | UCAA2000 |
| 20-11-2013 - series 3 | 0.0017350462126397 | neg        | 0.014412886816448 | UCAA2000 |
| 20-11-2013 - series 3 | 0.0650689709344724 | neg        | 0.040559440559441 | UCAA2000 |
| 20-11-2013 - series 3 | 0.1517906363791250 | neg        | 0.068121942039895 | UCAA2000 |
| 20-11-2013 - series 3 | 0.0203883781868247 | neg        | 0.023650385604113 | UCAA2000 |
| 20-11-2013 - series 3 | 0.0261727576650546 | neg        | 0.026069395997797 | UCAA2000 |
| 20-11-2013 - series 3 | 0.0399071503921173 | neg        | 0.031465589769477 | UCAA2000 |
| 20-11-2013 - series 3 | 0.0868251926251323 | neg        | 0.047900650502661 | UCAA2000 |

|                       |                    |     |                   |          |
|-----------------------|--------------------|-----|-------------------|----------|
| 20-11-2013 - series 3 | 0.0000000000000000 | neg | 0.010930156301235 | UCAA2000 |
| 20-11-2013 - series 3 | 0.0000000000000000 | neg | 0.011309658448315 | UCAA2000 |
| 20-11-2013 - series 3 | 0.0433453734497530 | neg | 0.032759070738711 | UCAA2000 |
| 20-11-2013 - series 3 | 0.0000000000000000 | neg | 0.011726078799250 | UCAA2000 |
| 20-11-2013 - series 3 | 0.0000000000000000 | neg | 0.010793308148948 | UCAA2000 |
| 20-11-2013 - series 3 | 0.0000000000000000 | neg | 0.012000480019201 | UCAA2000 |
| 20-11-2013 - series 3 | 0.0242120807441436 | neg | 0.025261478461266 | UCAA2000 |
| 21-11-2013 - series 1 | 0.0000000000000000 | neg | 0.017292062943109 | UCAA2000 |
| 21-11-2013 - series 1 | 0.0000000000000000 | neg | 0.006251288040118 | UCAA2000 |
| 21-11-2013 - series 1 | 0.0146162631047263 | neg | 0.038363913264196 | UCAA2000 |
| 21-11-2013 - series 1 | 0.0593348016802237 | neg | 0.052048192771084 | UCAA2000 |
| 21-11-2013 - series 1 | 0.0267031596582485 | neg | 0.042427078458899 | UCAA2000 |
| 21-11-2013 - series 1 | 0.0000000000000000 | neg | 0.021075268817204 | UCAA2000 |
| 21-11-2013 - series 1 | 0.0000000000000000 | neg | 0.013713658804169 | UCAA2000 |
| 21-11-2013 - series 1 | 0.0000000000000000 | neg | 0.020019772614928 | UCAA2000 |
| 21-11-2013 - series 1 | 0.0000000000000000 | neg | 0.012504689258472 | UCAA2000 |
| 21-11-2013 - series 1 | 0.0147656001123100 | neg | 0.038417147568013 | UCAA2000 |
| 21-11-2013 - series 1 | 0.0000000000000000 | neg | 0.018122508155129 | UCAA2000 |
| 21-11-2013 - series 1 | 0.0322485783676767 | neg | 0.044169813479803 | UCAA2000 |
| 21-11-2013 - series 1 | 0.0000000000000000 | neg | 0.030303030303030 | UCAA2000 |
| 21-11-2013 - series 1 | 0.0000000000000000 | neg | 0.013414149443561 | UCAA2000 |
| 21-11-2013 - series 1 | 0.0000000000000000 | neg | 0.027234107115764 | UCAA2000 |
| 21-11-2013 - series 1 | 0.0000000000000000 | neg | 0.018318373328448 | UCAA2000 |
| 21-11-2013 - series 1 | 0.0000000000000000 | neg | 0.010864841373316 | UCAA2000 |
| 21-11-2013 - series 1 | 0.0000000000000000 | neg | 0.016793282686925 | UCAA2000 |

|                       |                    |            |                    |          |
|-----------------------|--------------------|------------|--------------------|----------|
| 21-11-2013 - series 1 | 2.0429875680343900 | pos        | 0.384859096214774  | UCAA2000 |
| 21-11-2013 - series 1 | 0.0000000000000000 | neg        | 0.010531858873091  | UCAA2000 |
| 21-11-2013 - series 1 | 0.0000000000000000 | neg        | 0.013755158184319  | UCAA2000 |
| 21-11-2013 - series 1 | 0.0000000000000000 | neg        | 0.004912194522903  | UCAA2000 |
| 21-11-2013 - series 1 | 0.0518877541898221 | neg        | 0.049964106245513  | UCAA2000 |
| 21-11-2013 - series 1 | 0.0000000000000000 | neg        | 0.011450818733539  | UCAA2000 |
| 21-11-2013 - series 1 | 0.0000000000000000 | neg        | 0.011317338162064  | UCAA2000 |
| 21-11-2013 - series 1 | 0.0000000000000000 | neg        | 0.012263919548688  | UCAA2000 |
| 21-11-2013 - series 1 | 0.0000000000000000 | neg        | 0.000490316253984  | UCAA2000 |
| 21-11-2013 - series 1 | 0.0000000000000000 | neg        | 0.013290802764487  | UCAA2000 |
| 21-11-2013 - series 1 | 0.0494398313949258 | neg        | 0.049267360373752  | UCAA2000 |
| 21-11-2013 - series 1 | 0.0000000000000000 | neg        | 0.013704262025490  | UCAA2000 |
| 21-11-2013 - series 1 | 0.0349211057237080 | neg        | 0.044989775051125  | UCAA2000 |
| 21-11-2013 - series 1 | 0.0164512561262739 | neg        | 0.039011540391370  | UCAA2000 |
| 21-11-2013 - series 1 | 0.0000000000000000 | neg        | 0.013201320132013  | UCAA2000 |
| 21-11-2013 - series 1 | 0.0203348882660435 | neg        | 0.040341237709659  | UCAA2000 |
| 21-11-2013 - series 1 | 0.0000000000000000 | neg        | 0.029541230558545  | UCAA2000 |
| 21-11-2013 - series 1 | 0.0000000000000000 | neg        | 0.019405897658283  | UCAA2000 |
| 21-11-2013 - series 1 | 0.0000000000000000 | neg        | 0.022921593596507  | UCAA2000 |
| 21-11-2013 - series 2 | 0.1309554208414620 | neg        | 0.070300560366786  | UCAA2000 |
| 21-11-2013 - series 2 | 0.0190000000000000 | neg        | 0.0400000000000000 | UCAA2000 |
| 21-11-2013 - series 2 | 0.0000000000000000 | neg        | 0.009002520705798  | UCAA2000 |
| 21-11-2013 - series 2 | 0.0000000000000000 | neg        | 0.005538600655589  | UCAA2000 |
| 21-11-2013 - series 2 | 0.0159090843999282 | neg        | 0.038821620272126  | UCAA2000 |
| 21-11-2013 - series 2 | 0.1569063994681950 | neg        | 0.076393831553974  | UCAA2000 |
| 21-11-2013 - series 2 | 0.2001109185289780 | indecisive | 0.086139298892989  | UCAA2000 |
| 21-11-2013 - series 2 | 0.0898995952940305 | neg        | 0.060163611887750  | UCAA2000 |
| 21-11-2013 - series 2 | 0.0153606261939941 | neg        | 0.038628301143082  | UCAA2000 |
| 21-11-2013 - series 2 | 0.1584148663750890 | neg        | 0.076741931015376  | UCAA2000 |
| 21-11-2013 - series 2 | 0.1960889931154450 | neg        | 0.085250190777281  | UCAA2000 |
| 21-11-2013 - series 2 | 0.0000000000000000 | neg        | 0.012138868657441  | UCAA2000 |
| 21-11-2013 - series 2 | 0.0630475889904873 | neg        | 0.053069053708440  | UCAA2000 |
| 21-11-2013 - series 2 | 0.0676712938598611 | neg        | 0.054325114918512  | UCAA2000 |
| 21-11-2013 - series 2 | 0.0181630841737363 | neg        | 0.039603960396040  | UCAA2000 |
| 21-11-2013 - series 2 | 0.0095011292595147 | neg        | 0.036471123237835  | UCAA2000 |
| 21-11-2013 - series 2 | 0.0225170583217118 | neg        | 0.041067761806982  | UCAA2000 |
| 21-11-2013 - series 2 | 0.0503820752637774 | neg        | 0.049536279323513  | UCAA2000 |
| 21-11-2013 - series 2 | 0.0000000000000000 | neg        | 0.027021657063382  | UCAA2000 |
| 21-11-2013 - series 2 | 0.0000000000000000 | neg        | 0.027673649393605  | UCAA2000 |
| 21-11-2013 - series 2 | 0.1201901046631430 | neg        | 0.067708333333333  | UCAA2000 |
| 21-11-2013 - series 2 | 0.0661879707568413 | neg        | 0.053923928743380  | UCAA2000 |

|                       |                      |     |                   |          |
|-----------------------|----------------------|-----|-------------------|----------|
| 21-11-2013 - series 2 | 0.0000000000000000   | neg | 0.021932681867535 | UCAA2000 |
| 21-11-2013 - series 2 | 0.0069846146463764   | neg | 0.035474411124775 | UCAA2000 |
| 21-11-2013 - series 2 | 0.0381744598647843   | neg | 0.045972701364932 | UCAA2000 |
| 21-11-2013 - series 2 | 0.0659193654577579   | neg | 0.053851104913109 | UCAA2000 |
| 21-11-2013 - series 2 | 0.0836340985419195   | neg | 0.058548009367682 | UCAA2000 |
| 21-11-2013 - series 2 | 0.0000000000000000   | neg | 0.003867591855307 | UCAA2000 |
| 21-11-2013 - series 2 | 0.0000000000000000   | neg | 0.023371365476629 | UCAA2000 |
| 21-11-2013 - series 2 | 0.0109208908129674   | neg | 0.037011745424747 | UCAA2000 |
| 21-11-2013 - series 2 | 0.0000000000000000   | neg | 0.025029216984807 | UCAA2000 |
| 21-11-2013 - series 2 | 0.0492032724974669   | neg | 0.049199699215813 | UCAA2000 |
| 21-11-2013 - series 2 | 0.0000000000000000   | neg | 0.017035775127768 | UCAA2000 |
| 21-11-2013 - series 2 | 0.0198845226806749   | neg | 0.040189573459716 | UCAA2000 |
| 21-11-2013 - series 2 | 0.0000000000000000   | neg | 0.004772977603720 | UCAA2000 |
| 22-11-2013 - series 3 | 999.0000000000000000 | pos | 4.646628131021190 | UCAA2000 |
| 22-11-2013 - series 3 | 4.4290185564789300   | pos | 0.446371347785108 | UCAA2000 |

|                       |                    |            |                   |          |
|-----------------------|--------------------|------------|-------------------|----------|
| 22-11-2013 - series 3 | 0.0000000000000000 | neg        | 0.012331976815884 | UCAA2000 |
| 22-11-2013 - series 3 | 0.0140377487984809 | neg        | 0.017019959771004 | UCAA2000 |
| 22-11-2013 - series 3 | 0.0000000000000000 | neg        | 0.004474898615578 | UCAA2000 |
| 22-11-2013 - series 3 | 0.0000000000000000 | neg        | 0.008766662663624 | UCAA2000 |
| 25-11-2013 - series 1 | 0.0000000000000000 | neg        | 0.016581473631717 | UCAA2000 |
| 25-11-2013 - series 1 | 0.0000000000000000 | neg        | 0.011349449551697 | UCAA2000 |
| 25-11-2013 - series 1 | 0.0000000000000000 | neg        | 0.016157760814249 | UCAA2000 |
| 25-11-2013 - series 1 | 0.0605459096352687 | neg        | 0.039576531117048 | UCAA2000 |
| 25-11-2013 - series 1 | 0.2557970212370840 | indecisive | 0.070918492982024 | UCAA2000 |
| 25-11-2013 - series 1 | 0.0125927792897323 | neg        | 0.030211153221440 | UCAA2000 |
| 25-11-2013 - series 1 | 0.0260936067525078 | neg        | 0.033050847457627 | UCAA2000 |
| 25-11-2013 - series 1 | 0.6505258364577770 | pos        | 0.125385162360749 | UCAA2000 |
| 25-11-2013 - series 1 | 0.0089467066167813 | neg        | 0.029385273587030 | UCAA2000 |
| 25-11-2013 - series 1 | 0.0664741558259164 | neg        | 0.040639821445178 | UCAA2000 |
| 25-11-2013 - series 1 | 0.0000000000000000 | neg        | 0.017750826901874 | UCAA2000 |
| 25-11-2013 - series 1 | 0.0000000000000000 | neg        | 0.026108767529358 | UCAA2000 |
| 25-11-2013 - series 1 | 0.1108342732621660 | neg        | 0.048263492581119 | UCAA2000 |

|                       |                     |            |                   |          |
|-----------------------|---------------------|------------|-------------------|----------|
| 25-11-2013 - series 1 | 0.0000000000000000  | neg        | 0.019815927873779 | UCAA2000 |
| 25-11-2013 - series 1 | 0.0000000000000000  | neg        | 0.000478659752692 | UCAA2000 |
| 25-11-2013 - series 1 | 0.0000000000000000  | neg        | 0.015757957768673 | UCAA2000 |
| 25-11-2013 - series 1 | 0.0000000000000000  | neg        | 0.026164824401847 | UCAA2000 |
| 25-11-2013 - series 1 | 0.0000000000000000  | neg        | 0.012565971349585 | UCAA2000 |
| 25-11-2013 - series 1 | 0.0502397847392895  | neg        | 0.037694013303769 | UCAA2000 |
| 25-11-2013 - series 1 | 0.0000000000000000  | neg        | 0.017361111111111 | UCAA2000 |
| 25-11-2013 - series 1 | 6.8269297612780000  | pos        | 0.740254411161264 | UCAA2000 |
| 25-11-2013 - series 1 | 0.0000000000000000  | neg        | 0.016806722689076 | UCAA2000 |
| 25-11-2013 - series 1 | 0.0553842412512067  | neg        | 0.038639489808678 | UCAA2000 |
| 25-11-2013 - series 1 | 9.8213274145657100  | pos        | 0.980339403973510 | UCAA2000 |
| 25-11-2013 - series 1 | 0.2200852957346680  | indecisive | 0.065553795540392 | UCAA2000 |
| 25-11-2013 - series 1 | 0.1170641294260900  | neg        | 0.049297274275980 | UCAA2000 |
| 25-11-2013 - series 1 | 0.0000000000000000  | neg        | 0.010147804985661 | UCAA2000 |
| 25-11-2013 - series 1 | 0.3125198438909170  | indecisive | 0.079234564209897 | UCAA2000 |
| 25-11-2013 - series 1 | 63.8789874885217000 | pos        | 3.519514967790830 | UCAA2000 |
| 25-11-2013 - series 1 | 0.0467316193676548  | neg        | 0.037041972018654 | UCAA2000 |
| 25-11-2013 - series 1 | 0.0000000000000000  | neg        | 0.025493421052632 | UCAA2000 |
| 25-11-2013 - series 1 | 0.0000000000000000  | neg        | 0.001018675721562 | UCAA2000 |
| 25-11-2013 - series 1 | 0.0207482526952813  | neg        | 0.031957390146471 | UCAA2000 |
| 25-11-2013 - series 1 | 0.0000000000000000  | neg        | 0.012048192771084 | UCAA2000 |
| 25-11-2013 - series 1 | 0.0201252520637781  | neg        | 0.031827694454133 | UCAA2000 |
| 25-11-2013 - series 1 | 15.7187591190263000 | pos        | 1.396136314304320 | UCAA2000 |
| 25-11-2013 - series 1 | 0.0000000000000000  | neg        | 0.025505257662764 | UCAA2000 |
| 25-11-2013 - series 2 | 0.0000000000000000  | neg        | 0.024028584189370 | UCAA2000 |
| 25-11-2013 - series 2 | 0.0000000000000000  | neg        | 0.012974479948531 | UCAA2000 |
| 25-11-2013 - series 2 | 0.0000000000000000  | neg        | 0.001390374331551 | UCAA2000 |
| 25-11-2013 - series 2 | 0.0127921070558667  | neg        | 0.030255314362839 | UCAA2000 |
| 25-11-2013 - series 2 | 0.0616660064039663  | neg        | 0.039778449144008 | UCAA2000 |
| 25-11-2013 - series 2 | 0.0569078369400385  | neg        | 0.038917236011416 | UCAA2000 |
| 25-11-2013 - series 2 | 0.1209552432799720  | neg        | 0.049939212568970 | UCAA2000 |

|                       |                     |            |                   |          |
|-----------------------|---------------------|------------|-------------------|----------|
| 25-11-2013 - series 2 | 0.0370430658359166  | neg        | 0.035205643551178 | UCAA2000 |
| 25-11-2013 - series 2 | 12.2662552432050000 | pos        | 1.160627001516940 | UCAA2000 |
| 25-11-2013 - series 2 | 0.0000000000000000  | neg        | 0.011389521640091 | UCAA2000 |
| 25-11-2013 - series 2 | 0.0000000000000000  | neg        | 0.015195022732711 | UCAA2000 |
| 25-11-2013 - series 2 | 0.0000000000000000  | neg        | 0.009462266328179 | UCAA2000 |
| 25-11-2013 - series 2 | 0.1043163057140960  | neg        | 0.047173540650942 | UCAA2000 |
| 25-11-2013 - series 2 | 0.0138902144879195  | neg        | 0.030497031777442 | UCAA2000 |
| 25-11-2013 - series 2 | 0.0472503831849754  | neg        | 0.037138787138787 | UCAA2000 |
| 25-11-2013 - series 2 | 0.0333570938734575  | neg        | 0.034491046749189 | UCAA2000 |
| 25-11-2013 - series 2 | 0.3626862076734090  | indecisive | 0.086414445399828 | UCAA2000 |
| 25-11-2013 - series 2 | 0.1154482564324420  | neg        | 0.049029859416754 | UCAA2000 |
| 25-11-2013 - series 2 | 0.0755511046360428  | neg        | 0.042244046818243 | UCAA2000 |
| 25-11-2013 - series 2 | 0.0282626190341820  | neg        | 0.033485856905158 | UCAA2000 |
| 25-11-2013 - series 2 | 0.0876913863884398  | neg        | 0.044350476939719 | UCAA2000 |
| 25-11-2013 - series 2 | 0.0628981136839739  | neg        | 0.040000000000000 | UCAA2000 |
| 25-11-2013 - series 2 | 0.0000000000000000  | neg        | 0.003967521682967 | UCAA2000 |
| 25-11-2013 - series 2 | 65.5295029913139000 | pos        | 3.570048309178740 | UCAA2000 |
| 25-11-2013 - series 2 | 0.0000000000000000  | neg        | 0.003922887245012 | UCAA2000 |
| 25-11-2013 - series 2 | 0.0000000000000000  | neg        | 0.024856181482688 | UCAA2000 |
| 25-11-2013 - series 2 | 0.1626587163974110  | neg        | 0.056662840446624 | UCAA2000 |
| 25-11-2013 - series 2 | 0.0000000000000000  | neg        | 0.005976602238047 | UCAA2000 |
| 25-11-2013 - series 2 | 0.0053718627223170  | neg        | 0.028530513328927 | UCAA2000 |
| 25-11-2013 - series 2 | 0.1390565614153350  | neg        | 0.052890638983354 | UCAA2000 |
| 25-11-2013 - series 2 | 0.0000000000000000  | neg        | 0.013457139012246 | UCAA2000 |
| 25-11-2013 - series 2 | 0.0000000000000000  | neg        | 0.022346368715084 | UCAA2000 |
| 25-11-2013 - series 2 | 0.0890999524754366  | neg        | 0.044592264104459 | UCAA2000 |
| 25-11-2013 - series 2 | 0.4029445723467270  | pos        | 0.092075184150368 | UCAA2000 |
| 25-11-2013 - series 2 | 0.0000000000000000  | neg        | 0.016150740242261 | UCAA2000 |
| 25-11-2013 - series 2 | 0.0000000000000000  | neg        | 0.013349700782569 | UCAA2000 |
| 25-11-2013 - series 2 | 0.0000000000000000  | neg        | 0.005900816070308 | UCAA2000 |
| 25-11-2013 - series 3 | 0.0000000000000000  | neg        | 0.023512123438648 | UCAA2000 |
| 25-11-2013 - series 3 | 0.0000000000000000  | neg        | 0.016089362574298 | UCAA2000 |
| 25-11-2013 - series 3 | 0.0080299757185671  | neg        | 0.029171210468920 | UCAA2000 |
| 25-11-2013 - series 3 | 0.0000000000000000  | neg        | 0.023556821123479 | UCAA2000 |
| 25-11-2013 - series 3 | 0.0491176175447334  | neg        | 0.037486116253240 | UCAA2000 |
| 25-11-2013 - series 3 | 0.0000000000000000  | neg        | 0.013846579894766 | UCAA2000 |
| 25-11-2013 - series 3 | 0.0653386227984524  | neg        | 0.040437158469945 | UCAA2000 |
| 25-11-2013 - series 3 | 0.0589797986656601  | neg        | 0.039293379560839 | UCAA2000 |
| 25-11-2013 - series 3 | 0.0101473131087344  | neg        | 0.029661366070693 | UCAA2000 |
| 25-11-2013 - series 3 | 0.0590528753156928  | neg        | 0.039306613668985 | UCAA2000 |
| 25-11-2013 - series 3 | 0.0725435468223946  | neg        | 0.041715490977267 | UCAA2000 |
| 25-11-2013 - series 3 | 0.0000000000000000  | neg        | 0.011132115101869 | UCAA2000 |



|                       |                     |            |                   |          |
|-----------------------|---------------------|------------|-------------------|----------|
| 27-11-2013 - series 1 | 0.3378977108951290  | indecisive | 0.062265566391598 | UCAA2000 |
| 27-11-2013 - series 1 | 0.0948031767898461  | neg        | 0.040488351812632 | UCAA2000 |
| 27-11-2013 - series 1 | 0.0000000000000000  | neg        | 0.027474694360458 | UCAA2000 |
| 27-11-2013 - series 1 | 0.0000000000000000  | neg        | 0.026429926809434 | UCAA2000 |
| 27-11-2013 - series 1 | 0.0000000000000000  | neg        | 0.025280304632960 | UCAA2000 |
| 27-11-2013 - series 1 | 0.0000000000000000  | neg        | 0.027501733302519 | UCAA2000 |
| 27-11-2013 - series 1 | 0.0000000000000000  | neg        | 0.011371389583807 | UCAA2000 |
| 27-11-2013 - series 1 | 0.0000000000000000  | neg        | 0.010154292496374 | UCAA2000 |
| 27-11-2013 - series 1 | 0.0000000000000000  | neg        | 0.007992327365729 | UCAA2000 |
| 27-11-2013 - series 1 | 0.0000000000000000  | neg        | 0.007044090790504 | UCAA2000 |
| 27-11-2013 - series 1 | 0.0000000000000000  | neg        | 0.022855001873361 | UCAA2000 |
| 27-11-2013 - series 1 | 0.0000000000000000  | neg        | 0.011610356437943 | UCAA2000 |
| 27-11-2013 - series 1 | 1.3259482880363000  | pos        | 0.132400993334205 | UCAA2000 |
| 27-11-2013 - series 1 | 0.3038692045931650  | indecisive | 0.059445290038897 | UCAA2000 |
| 27-11-2013 - series 2 | 12.6470620272964000 | pos        | 0.644213023991563 | UCAA2000 |
| 27-11-2013 - series 2 | 0.0000000000000000  | neg        | 0.020218883324059 | UCAA2000 |
| 27-11-2013 - series 2 | 0.0576256046946204  | neg        | 0.036568096626406 | UCAA2000 |
| 27-11-2013 - series 2 | 0.0000000000000000  | neg        | 0.009263773768893 | UCAA2000 |
| 27-11-2013 - series 2 | 0.0597496908162663  | neg        | 0.036801375752365 | UCAA2000 |
| 27-11-2013 - series 2 | 0.0000000000000000  | neg        | 0.023497608650447 | UCAA2000 |

|                       |                      |            |                   |          |
|-----------------------|----------------------|------------|-------------------|----------|
| 27-11-2013 - series 2 | 0.0000000000000000   | neg        | 0.014929658340511 | UCAA2000 |
| 27-11-2013 - series 2 | 0.0000000000000000   | neg        | 0.025331871879187 | UCAA2000 |
| 27-11-2013 - series 2 | 0.0000000000000000   | neg        | 0.019647559246506 | UCAA2000 |
| 27-11-2013 - series 2 | 999.0000000000000000 | pos        | 3.923913043478260 | UCAA2000 |
| 27-11-2013 - series 2 | 0.0000000000000000   | neg        | 0.025286448044251 | UCAA2000 |
| 27-11-2013 - series 2 | 3.9787435762087700   | pos        | 0.281288584577394 | UCAA2000 |
| 27-11-2013 - series 2 | 0.0000000000000000   | neg        | 0.024955132039997 | UCAA2000 |
| 27-11-2013 - series 2 | 0.0000000000000000   | neg        | 0.013144329896907 | UCAA2000 |
| 27-11-2013 - series 2 | 0.1252190864998910   | neg        | 0.043504592712224 | UCAA2000 |
| 27-11-2013 - series 2 | 39.8109190729367000  | pos        | 1.371730769230770 | UCAA2000 |
| 27-11-2013 - series 2 | 1.4650929793696000   | pos        | 0.141238012205754 | UCAA2000 |
| 27-11-2013 - series 2 | 0.4588179667433980   | pos        | 0.071928188388902 | UCAA2000 |
| 27-11-2013 - series 2 | 999.0000000000000000 | pos        | 4.656068069861170 | UCAA2000 |
| 27-11-2013 - series 2 | 0.0000000000000000   | neg        | 0.026158634031458 | UCAA2000 |
| 27-11-2013 - series 2 | 0.0235394883632084   | neg        | 0.032570497985772 | UCAA2000 |
| 27-11-2013 - series 2 | 0.0000000000000000   | neg        | 0.020100502512563 | UCAA2000 |
| 27-11-2013 - series 2 | 0.3279262040810440   | indecisive | 0.061444379732091 | UCAA2000 |
| 27-11-2013 - series 2 | 0.0000000000000000   | neg        | 0.022932330827068 | UCAA2000 |
| 27-11-2013 - series 2 | 0.0000000000000000   | neg        | 0.016572790294627 | UCAA2000 |
| 27-11-2013 - series 2 | 0.3441225928812550   | indecisive | 0.062776098581725 | UCAA2000 |
| 27-11-2013 - series 2 | 0.0677514189365976   | neg        | 0.037668517049960 | UCAA2000 |
| 27-11-2013 - series 2 | 0.0000000000000000   | neg        | 0.028543568832550 | UCAA2000 |
| 27-11-2013 - series 2 | 0.0000000000000000   | neg        | 0.009154183688909 | UCAA2000 |
| 27-11-2013 - series 2 | 0.0000000000000000   | neg        | 0.006964388282596 | UCAA2000 |
| 27-11-2013 - series 2 | 0.0000000000000000   | neg        | 0.011329396167289 | UCAA2000 |
| 27-11-2013 - series 2 | 0.0000000000000000   | neg        | 0.009162202034319 | UCAA2000 |
| 27-11-2013 - series 2 | 2.3625520079277400   | pos        | 0.194820255121763 | UCAA2000 |
| 27-11-2013 - series 2 | 6.6542981416754000   | pos        | 0.407239819004525 | UCAA2000 |
| 27-11-2013 - series 2 | 35.7662016761758000  | pos        | 1.285375962107760 | UCAA2000 |
| 27-11-2013 - series 2 | 0.0575827063777092   | neg        | 0.036563371044434 | UCAA2000 |
| 27-11-2013 - series 2 | 0.0000000000000000   | neg        | 0.002005213555244 | UCAA2000 |
| 27-11-2013 - series 3 | 0.0000000000000000   | neg        | 0.028693257528649 | UCAA2000 |
| 27-11-2013 - series 3 | 0.0000000000000000   | neg        | 0.024640872391737 | UCAA2000 |
| 27-11-2013 - series 3 | 0.0891911296481804   | neg        | 0.039915580840521 | UCAA2000 |
| 27-11-2013 - series 3 | 0.0529033996035386   | neg        | 0.036044362292052 | UCAA2000 |
| 27-11-2013 - series 3 | 0.0396548123075104   | neg        | 0.034531162268389 | UCAA2000 |
| 27-11-2013 - series 3 | 0.0000000000000000   | neg        | 0.015211422295442 | UCAA2000 |
| 27-11-2013 - series 3 | 0.0619582175847148   | neg        | 0.037042502951594 | UCAA2000 |
| 27-11-2013 - series 3 | 0.0000000000000000   | neg        | 0.012130033964095 | UCAA2000 |
| 27-11-2013 - series 3 | 0.9464595706054680   | pos        | 0.107300025886617 | UCAA2000 |
| 27-11-2013 - series 3 | 0.0000000000000000   | neg        | 0.023798832510103 | UCAA2000 |
| 27-11-2013 - series 3 | 0.0000000000000000   | neg        | 0.013367196898810 | UCAA2000 |
| 27-11-2013 - series 3 | 0.0000000000000000   | neg        | 0.009167583425009 | UCAA2000 |
| 27-11-2013 - series 3 | 0.0000000000000000   | neg        | 0.025801474369964 | UCAA2000 |

|                       |                      |            |                   |          |
|-----------------------|----------------------|------------|-------------------|----------|
| 27-11-2013 - series 3 | 0.0000000000000000   | neg        | 0.009594166746618 | UCAA2000 |
| 27-11-2013 - series 3 | 0.0000000000000000   | neg        | 0.024539363484087 | UCAA2000 |
| 27-11-2013 - series 3 | 0.0000000000000000   | neg        | 0.000235294117647 | UCAA2000 |
| 27-11-2013 - series 3 | 0.0668040506929129   | neg        | 0.037566760206391 | UCAA2000 |
| 27-11-2013 - series 3 | 0.0000000000000000   | neg        | 0.009560229445507 | UCAA2000 |
| 27-11-2013 - series 3 | 0.0007171491154867   | neg        | 0.029190294691829 | UCAA2000 |
| 27-11-2013 - series 3 | 0.0000000000000000   | neg        | 0.009807767752060 | UCAA2000 |
| 27-11-2013 - series 3 | 0.0000000000000000   | neg        | 0.015353021709368 | UCAA2000 |
| 27-11-2013 - series 3 | 0.3804986227729810   | indecisive | 0.065728838224594 | UCAA2000 |
| 27-11-2013 - series 3 | 999.0000000000000000 | pos        | 3.687695190505930 | UCAA2000 |
| 27-11-2013 - series 3 | 0.1383938615335250   | neg        | 0.044772093859570 | UCAA2000 |
| 27-11-2013 - series 3 | 26.2551819189250000  | pos        | 1.057491767288690 | UCAA2000 |
| 27-11-2013 - series 3 | 0.1207598584397860   | neg        | 0.043070686597416 | UCAA2000 |
| 27-11-2013 - series 3 | 0.0000000000000000   | neg        | 0.019094333012175 | UCAA2000 |
| 27-11-2013 - series 3 | 11.1923120199012000  | pos        | 0.590981644054270 | UCAA2000 |
| 27-11-2013 - series 3 | 0.0000000000000000   | neg        | 0.019647186690076 | UCAA2000 |
| 27-11-2013 - series 3 | 0.0000000000000000   | neg        | 0.028995167472088 | UCAA2000 |
| 27-11-2013 - series 3 | 0.0500235741536324   | neg        | 0.035721257075932 | UCAA2000 |
| 27-11-2013 - series 3 | 999.0000000000000000 | pos        | 3.232091690544410 | UCAA2000 |

|                       |                      |            |                   |          |
|-----------------------|----------------------|------------|-------------------|----------|
| 27-11-2013 - series 3 | 0.0000000000000000   | neg        | 0.011603620329543 | UCAA2000 |
| 27-11-2013 - series 3 | 0.0418276598637471   | neg        | 0.034784357092591 | UCAA2000 |
| 27-11-2013 - series 3 | 0.0000000000000000   | neg        | 0.010770059235326 | UCAA2000 |
| 27-11-2013 - series 3 | 0.0000000000000000   | neg        | 0.010905125408942 | UCAA2000 |
| 27-11-2013 - series 3 | 0.3122529765798700   | indecisive | 0.060144927536232 | UCAA2000 |
| 27-11-2013 - series 4 | 0.1056688858612380   | neg        | 0.041581902514444 | UCAA2000 |
| 27-11-2013 - series 4 | 0.0000000000000000   | neg        | 0.009567546880980 | UCAA2000 |
| 27-11-2013 - series 4 | 0.0000000000000000   | neg        | 0.025268636668905 | UCAA2000 |
| 27-11-2013 - series 4 | 1.3444211002089500   | pos        | 0.133584291382643 | UCAA2000 |
| 27-11-2013 - series 4 | 0.1085412795757960   | neg        | 0.041867833433917 | UCAA2000 |
| 27-11-2013 - series 4 | 0.0000000000000000   | neg        | 0.009288500835965 | UCAA2000 |
| 27-11-2013 - series 4 | 0.0000000000000000   | neg        | 0.013246787653994 | UCAA2000 |
| 27-11-2013 - series 4 | 1.7322719334778000   | pos        | 0.157757234726688 | UCAA2000 |
| 27-11-2013 - series 4 | 0.1752192212449970   | neg        | 0.048215777539086 | UCAA2000 |
| 27-11-2013 - series 4 | 0.0551107765392233   | neg        | 0.036290086181626 | UCAA2000 |
| 27-11-2013 - series 4 | 0.0000000000000000   | neg        | 0.004658385093168 | UCAA2000 |
| 27-11-2013 - series 4 | 0.0202040554413258   | neg        | 0.032140691328078 | UCAA2000 |
| 27-11-2013 - series 4 | 0.0544919405482379   | neg        | 0.036221361729590 | UCAA2000 |
| 27-11-2013 - series 4 | 0.1800161466107820   | neg        | 0.048654970760234 | UCAA2000 |
| 27-11-2013 - series 4 | 0.0199528883461963   | neg        | 0.032107882485150 | UCAA2000 |
| 27-11-2013 - series 4 | 0.0000000000000000   | neg        | 0.013668671405139 | UCAA2000 |
| 27-11-2013 - series 4 | 0.0000000000000000   | neg        | 0.010612331529237 | UCAA2000 |
| 27-11-2013 - series 4 | 0.1779151491527160   | neg        | 0.048462852263023 | UCAA2000 |
| 27-11-2013 - series 4 | 0.1025996066356110   | neg        | 0.041274957471573 | UCAA2000 |
| 27-11-2013 - series 4 | 0.0000000000000000   | neg        | 0.017644511799091 | UCAA2000 |
| 27-11-2013 - series 4 | 0.0000000000000000   | neg        | 0.019539249146758 | UCAA2000 |
| 27-11-2013 - series 4 | 2.4378913955811000   | pos        | 0.199099239012269 | UCAA2000 |
| 27-11-2013 - series 4 | 0.0000000000000000   | neg        | 0.012501562695337 | UCAA2000 |
| 27-11-2013 - series 4 | 0.0000000000000000   | neg        | 0.011435105774728 | UCAA2000 |
| 27-11-2013 - series 4 | 4.3290815723146600   | pos        | 0.298815753236023 | UCAA2000 |
| 27-11-2013 - series 4 | 0.3392017720091600   | indecisive | 0.062372651120670 | UCAA2000 |
| 27-11-2013 - series 4 | 0.0000000000000000   | neg        | 0.010092854259185 | UCAA2000 |
| 27-11-2013 - series 4 | 0.2906596806660750   | indecisive | 0.058336209872282 | UCAA2000 |
| 27-11-2013 - series 4 | 0.0000000000000000   | neg        | 0.013755158184319 | UCAA2000 |
| 27-11-2013 - series 4 | 0.0000000000000000   | neg        | 0.013812500000000 | UCAA2000 |
| 27-11-2013 - series 4 | 0.7671475474061880   | pos        | 0.094802494802495 | UCAA2000 |
| 27-11-2013 - series 4 | 0.0000000000000000   | neg        | 0.026311263972485 | UCAA2000 |
| 27-11-2013 - series 4 | 0.1859235619544690   | neg        | 0.049193169356102 | UCAA2000 |
| 27-11-2013 - series 4 | 999.0000000000000000 | pos        | 4.595254237288140 | UCAA2000 |
| 27-11-2013 - series 4 | 0.2848810619974990   | indecisive | 0.057848355291859 | UCAA2000 |

|                       |                    |            |                   |          |
|-----------------------|--------------------|------------|-------------------|----------|
| 27-11-2013 - series 4 | 3.1814408223859100 | pos        | 0.239914468995011 | UCAA2000 |
| 27-11-2013 - series 4 | 0.3051366446210390 | indecisive | 0.059551268609771 | UCAA2000 |
| 28-11-2013 - series 1 | 0.0000000000000000 | neg        | 0.015390279823270 | UCAA2000 |
| 28-11-2013 - series 1 | 0.0162045620012742 | neg        | 0.040936265072449 | UCAA2000 |
| 28-11-2013 - series 1 | 0.0000000000000000 | neg        | 0.031818677127602 | UCAA2000 |
| 28-11-2013 - series 1 | 0.1018799455998310 | neg        | 0.063538016151150 | UCAA2000 |
| 28-11-2013 - series 1 | 0.2278330037860170 | indecisive | 0.093947455936149 | UCAA2000 |
| 28-11-2013 - series 1 | 0.0000000000000000 | neg        | 0.016460905349794 | UCAA2000 |
| 28-11-2013 - series 1 | 0.0000000000000000 | neg        | 0.015598190609889 | UCAA2000 |
| 28-11-2013 - series 1 | 0.0000000000000000 | neg        | 0.028399599064484 | UCAA2000 |
| 28-11-2013 - series 1 | 0.0000000000000000 | neg        | 0.017094017094017 | UCAA2000 |
| 28-11-2013 - series 1 | 0.0014863782455640 | neg        | 0.036523503550896 | UCAA2000 |
| 28-11-2013 - series 1 | 0.0135941558769363 | neg        | 0.040186228865474 | UCAA2000 |
| 28-11-2013 - series 1 | 0.0000000000000000 | neg        | 0.015979546180889 | UCAA2000 |
| 28-11-2013 - series 1 | 0.0000000000000000 | neg        | 0.034492968171725 | UCAA2000 |
| 28-11-2013 - series 1 | 0.1835886622688860 | neg        | 0.083508359237167 | UCAA2000 |
| 28-11-2013 - series 1 | 0.1001410820141720 | neg        | 0.063100838617304 | UCAA2000 |
| 28-11-2013 - series 1 | 0.4356993130870020 | pos        | 0.140525114155251 | UCAA2000 |
| 28-11-2013 - series 1 | 0.0000000000000000 | neg        | 0.022841757859997 | UCAA2000 |
| 28-11-2013 - series 1 | 0.8851093846625350 | pos        | 0.231640449438202 | UCAA2000 |
| 28-11-2013 - series 1 | 0.0000000000000000 | neg        | 0.009768486861385 | UCAA2000 |
| 28-11-2013 - series 1 | 0.0000000000000000 | neg        | 0.022636965683323 | UCAA2000 |
| 28-11-2013 - series 1 | 0.0417733486516849 | neg        | 0.047987747809070 | UCAA2000 |
| 28-11-2013 - series 1 | 0.0122206989180490 | neg        | 0.039788021534320 | UCAA2000 |
| 28-11-2013 - series 1 | 0.0000000000000000 | neg        | 0.005166126418152 | UCAA2000 |
| 28-11-2013 - series 1 | 1.8391820901722200 | pos        | 0.396751015307716 | UCAA2000 |
| 28-11-2013 - series 1 | 0.0000000000000000 | neg        | 0.016386510201924 | UCAA2000 |
| 28-11-2013 - series 1 | 0.0446017357006959 | neg        | 0.048745260877415 | UCAA2000 |
| 28-11-2013 - series 1 | 0.0000000000000000 | neg        | 0.011624610150269 | UCAA2000 |
| 28-11-2013 - series 1 | 0.0000000000000000 | neg        | 0.028460038986355 | UCAA2000 |
| 28-11-2013 - series 1 | 0.0000000000000000 | neg        | 0.006954872362286 | UCAA2000 |
| 28-11-2013 - series 1 | 0.0237874016199171 | neg        | 0.043075020610058 | UCAA2000 |
| 28-11-2013 - series 1 | 0.0000000000000000 | neg        | 0.012225467921671 | UCAA2000 |
| 28-11-2013 - series 1 | 0.0034479803260351 | neg        | 0.037154297420616 | UCAA2000 |
| 28-11-2013 - series 1 | 0.0000000000000000 | neg        | 0.028526808953670 | UCAA2000 |
| 28-11-2013 - series 1 | 0.0039772505036761 | neg        | 0.037320035389689 | UCAA2000 |
| 28-11-2013 - series 1 | 0.0257551496216195 | neg        | 0.043622141997593 | UCAA2000 |
| 28-11-2013 - series 1 | 0.0039784057049045 | neg        | 0.037320395596193 | UCAA2000 |
| 28-11-2013 - series 1 | 0.0000000000000000 | neg        | 0.013649586037145 | UCAA2000 |
| 28-11-2013 - series 2 | 0.5238461757909300 | neg        | 0.058635942804238 | UCAA250  |
| 28-11-2013 - series 2 | 0.0567621461440234 | neg        | 0.017554858934169 | UCAA250  |
| 28-11-2013 - series 2 | 0.0000000000000000 | neg        | 0.009961151509114 | UCAA250  |
| 28-11-2013 - series 2 | 0.0000000000000000 | neg        | 0.008256039139741 | UCAA250  |
| 28-11-2013 - series 2 | 0.6615590762739600 | neg        | 0.069101052364651 | UCAA250  |
| 28-11-2013 - series 2 | 0.5855891591562780 | neg        | 0.063379420041600 | UCAA250  |
| 28-11-2013 - series 2 | 0.1292388058837350 | neg        | 0.025066891987044 | UCAA250  |
| 28-11-2013 - series 2 | 0.3984789263596680 | neg        | 0.048694502588961 | UCAA250  |

|                       |                    |     |                   |         |
|-----------------------|--------------------|-----|-------------------|---------|
| 28-11-2013 - series 2 | 0.0000000000000000 | neg | 0.001093792726278 | UCAA250 |
| 28-11-2013 - series 2 | 0.0045142955652138 | neg | 0.010901558922926 | UCAA250 |
| 28-11-2013 - series 2 | 0.1873340671703680 | neg | 0.030567685589520 | UCAA250 |
| 28-11-2013 - series 2 | 0.0252307333031935 | neg | 0.013824884792627 | UCAA250 |
| 28-11-2013 - series 2 | 0.0324023189626355 | neg | 0.014718869590815 | UCAA250 |
| 28-11-2013 - series 2 | 0.0090962113780706 | neg | 0.011623852144601 | UCAA250 |
| 28-11-2013 - series 2 | 0.0429601313718332 | neg | 0.015979546180889 | UCAA250 |
| 28-11-2013 - series 2 | 0.1041893620376460 | neg | 0.022576093529530 | UCAA250 |

|                       |                    |     |                   |         |
|-----------------------|--------------------|-----|-------------------|---------|
| 28-11-2013 - series 2 | 0.2344819798690310 | neg | 0.034824079906416 | UCAA250 |
| 28-11-2013 - series 2 | 0.1315609565774350 | neg | 0.025293586269196 | UCAA250 |
| 28-11-2013 - series 2 | 0.0764247312393451 | neg | 0.019696832168467 | UCAA250 |
| 28-11-2013 - series 2 | 0.0657983828480077 | neg | 0.018552036199095 | UCAA250 |
| 28-11-2013 - series 2 | 0.0000000000000000 | neg | 0.003008811519450 | UCAA250 |
| 28-11-2013 - series 2 | 0.0000000000000000 | neg | 0.001676797317124 | UCAA250 |
| 28-11-2013 - series 2 | 0.1307871557218390 | neg | 0.025218118800048 | UCAA250 |
| 28-11-2013 - series 2 | 0.3301319766134100 | neg | 0.043058239028430 | UCAA250 |
| 28-11-2013 - series 2 | 0.0000000000000000 | neg | 0.004165753124315 | UCAA250 |
| 28-11-2013 - series 2 | 0.3156610192476820 | neg | 0.041841004184100 | UCAA250 |

|                       |                      |            |                   |         |
|-----------------------|----------------------|------------|-------------------|---------|
| 28-11-2013 - series 2 | 0.2002841127839270   | neg        | 0.031752692684292 | UCAA250 |
| 28-11-2013 - series 2 | 0.1896671807021690   | neg        | 0.030782146355114 | UCAA250 |
| 28-11-2013 - series 2 | 0.1595985631844490   | neg        | 0.027982779827798 | UCAA250 |
| 28-11-2013 - series 2 | 0.0193558099028570   | neg        | 0.013061650992686 | UCAA250 |
| 28-11-2013 - series 2 | 0.0169268554707626   | neg        | 0.012735608762099 | UCAA250 |
| 28-11-2013 - series 2 | 0.3371450490392130   | neg        | 0.043644942494839 | UCAA250 |
| 28-11-2013 - series 3 | 0.0576910210860942   | neg        | 0.017658484901995 | UCAA250 |
| 28-11-2013 - series 3 | 1.2398169173746100   | indecisive | 0.109714529186195 | UCAA250 |
| 28-11-2013 - series 3 | 0.8435565672395520   | indecisive | 0.082378133266154 | UCAA250 |
| 28-11-2013 - series 3 | 10.6249102330567000  | pos        | 0.583665338645418 | UCAA250 |
| 29-11-2013 - series 1 | 0.3196830843985880   | neg        | 0.022773855613755 | UCAA250 |
| 29-11-2013 - series 1 | 33.3562413314074000  | pos        | 1.698685269653880 | UCAA250 |
| 29-11-2013 - series 1 | 1.3536345553163300   | indecisive | 0.051306413301663 | UCAA250 |
| 29-11-2013 - series 1 | 25.6302849242012000  | pos        | 1.327908587257620 | UCAA250 |
| 29-11-2013 - series 1 | 0.0000000000000000   | neg        | 0.017088174982912 | UCAA250 |
| 29-11-2013 - series 1 | 0.0000000000000000   | neg        | 0.010207206287639 | UCAA250 |
| 29-11-2013 - series 1 | 11.7217464493919000  | pos        | 0.567872781746946 | UCAA250 |
| 29-11-2013 - series 1 | 0.1836101461572680   | neg        | 0.020259319286872 | UCAA250 |
| 29-11-2013 - series 1 | 0.9824108016475180   | indecisive | 0.039657968450538 | UCAA250 |
| 29-11-2013 - series 1 | 0.6456272375770720   | neg        | 0.030311614730878 | UCAA250 |
| 29-11-2013 - series 1 | 0.0552566917636746   | neg        | 0.018446781036709 | UCAA250 |
| 29-11-2013 - series 1 | 0.0000000000000000   | neg        | 0.016101131071191 | UCAA250 |
| 29-11-2013 - series 1 | 0.2203573746650590   | neg        | 0.020889910173386 | UCAA250 |
| 29-11-2013 - series 1 | 1.2123476322710100   | indecisive | 0.046727594339623 | UCAA250 |
| 29-11-2013 - series 1 | 11.9163345450859000  | pos        | 0.578840284842319 | UCAA250 |
| 29-11-2013 - series 1 | 0.6223414794004640   | neg        | 0.029717373233583 | UCAA250 |
| 29-11-2013 - series 1 | 0.9839133712266570   | indecisive | 0.039702504648365 | UCAA250 |
| 29-11-2013 - series 1 | 0.0000000000000000   | neg        | 0.016869918699187 | UCAA250 |
| 29-11-2013 - series 1 | 0.0000000000000000   | neg        | 0.014249073810202 | UCAA250 |
| 29-11-2013 - series 1 | 0.4957678624033330   | neg        | 0.026625560538117 | UCAA250 |
| 29-11-2013 - series 1 | 128.4615338217460000 | pos        | 3.797510069571580 | UCAA250 |
| 29-11-2013 - series 1 | 0.0000000000000000   | neg        | 0.013280212483400 | UCAA250 |
| 29-11-2013 - series 1 | 1.6866445489260900   | pos        | 0.062717770034843 | UCAA250 |

|                       |                     |            |                    |         |
|-----------------------|---------------------|------------|--------------------|---------|
| 29-11-2013 - series 1 | 0.0000000000000000  | neg        | 0.013041210224309  | UCAA250 |
| 29-11-2013 - series 1 | 0.9099579263293340  | indecisive | 0.037538279166255  | UCAA250 |
| 29-11-2013 - series 1 | 39.8503066648025000 | pos        | 1.975622968580710  | UCAA250 |
| 29-11-2013 - series 1 | 0.0000000000000000  | neg        | 0.001675905633621  | UCAA250 |
| 29-11-2013 - series 1 | 0.0000000000000000  | neg        | 0.015128593040847  | UCAA250 |
| 29-11-2013 - series 1 | 0.0000000000000000  | neg        | 0.014664906877841  | UCAA250 |
| 29-11-2013 - series 1 | 0.0000000000000000  | neg        | 0.012235409274440  | UCAA250 |
| 29-11-2013 - series 1 | 0.4234913485572960  | neg        | 0.024975024975025  | UCAA250 |
| 29-11-2013 - series 1 | 0.6833191451993600  | neg        | 0.031289111389237  | UCAA250 |
| 29-11-2013 - series 1 | 0.0000000000000000  | neg        | 0.014222727919215  | UCAA250 |
| 29-11-2013 - series 1 | 0.1304903718215550  | neg        | 0.019425019425019  | UCAA250 |
| 29-11-2013 - series 1 | 0.3959766758959730  | neg        | 0.024371069182390  | UCAA250 |
| 29-11-2013 - series 1 | 2.6790903147314100  | pos        | 0.100872800114466  | UCAA250 |
| 29-11-2013 - series 1 | 0.5616559057837360  | neg        | 0.028204894914021  | UCAA250 |
| 29-11-2013 - series 1 | 0.5412665087920330  | neg        | 0.027708943455733  | UCAA250 |
| 29-11-2013 - series 1 | 0.0000000000000000  | neg        | 0.002457956015524  | UCAA250 |
| 29-11-2013 - series 1 | 8.1293850752054700  | pos        | 0.368591473286562  | UCAA250 |
| 29-11-2013 - series 1 | 1.3923044861078500  | indecisive | 0.052588331963846  | UCAA250 |
| 29-11-2013 - series 1 | 0.9939305191356140  | indecisive | 0.0400000000000000 | UCAA250 |
| 29-11-2013 - series 1 | 0.0000000000000000  | neg        | 0.016460905349794  | UCAA250 |
| 29-11-2013 - series 1 | 1.2512192215494200  | indecisive | 0.047970479704797  | UCAA250 |
| 29-11-2013 - series 1 | 0.5640914025382860  | neg        | 0.028264556246467  | UCAA250 |
| 29-11-2013 - series 1 | 0.0631248661751838  | neg        | 0.018534734384121  | UCAA250 |
| 29-11-2013 - series 1 | 0.0000000000000000  | neg        | 0.009189065012635  | UCAA250 |
| 29-11-2013 - series 1 | 0.0000000000000000  | neg        | 0.012233912405187  | UCAA250 |
| 29-11-2013 - series 1 | 4.5636500470715700  | pos        | 0.185171724513902  | UCAA250 |
| 29-11-2013 - series 1 | 0.9864430370084550  | indecisive | 0.039777535969049  | UCAA250 |



|                       |                     |            |                    |          |
|-----------------------|---------------------|------------|--------------------|----------|
| 25-11-2013 - series 3 | 0.5411471942608760  | pos        | 0.110947616244850  | UCAA2000 |
| 25-11-2013 - series 3 | 0.1208481919672790  | neg        | 0.049921589127026  | UCAA2000 |
| 25-11-2013 - series 3 | 0.0000000000000000  | neg        | 0.020879248347060  | UCAA2000 |
| 25-11-2013 - series 3 | 0.4556727175563970  | pos        | 0.099370277078086  | UCAA2000 |
| 25-11-2013 - series 3 | 0.0000000000000000  | neg        | 0.016524967069812  | UCAA2000 |
| 25-11-2013 - series 3 | 0.1844753981806730  | neg        | 0.060084033613445  | UCAA2000 |
| 25-11-2013 - series 3 | 0.0000000000000000  | neg        | 0.017374517374517  | UCAA2000 |
| 25-11-2013 - series 3 | 0.3326838102935510  | indecisive | 0.082138490607980  | UCAA2000 |
| 25-11-2013 - series 3 | 0.0000000000000000  | neg        | 0.010620220900595  | UCAA2000 |
| 25-11-2013 - series 3 | 0.0000000000000000  | neg        | 0.025855365474339  | UCAA2000 |
| 25-11-2013 - series 3 | 0.0000000000000000  | neg        | 0.013606888487297  | UCAA2000 |
| 25-11-2013 - series 3 | 0.0628981136839739  | neg        | 0.0400000000000000 | UCAA2000 |
| 25-11-2013 - series 3 | 0.0000000000000000  | neg        | 0.007413221698936  | UCAA2000 |
| 25-11-2013 - series 3 | 21.1905115481148000 | pos        | 1.732938939361930  | UCAA2000 |
| 25-11-2013 - series 3 | 0.3117895212678140  | indecisive | 0.079128905721629  | UCAA2000 |
| 25-11-2013 - series 3 | 0.1851507010859980  | neg        | 0.060189023379207  | UCAA2000 |
| 25-11-2013 - series 3 | 1.1007632499941400  | pos        | 0.181590967853141  | UCAA2000 |
| 25-11-2013 - series 3 | 0.1213245860291960  | neg        | 0.0500000000000000 | UCAA2000 |
| 25-11-2013 - series 3 | 0.0355069763989016  | neg        | 0.034909034364796  | UCAA2000 |
| 25-11-2013 - series 3 | 15.8063875245983000 | pos        | 1.401859189271560  | UCAA2000 |
| 25-11-2013 - series 3 | 3.2087386731794200  | pos        | 0.4100000000000000 | UCAA2000 |
| 25-11-2013 - series 3 | 54.4240959663710000 | pos        | 3.210203512684690  | UCAA2000 |

|                       |                     |     |                   |          |
|-----------------------|---------------------|-----|-------------------|----------|
| 25-11-2013 - series 3 | 65.2557813579477000 | pos | 3.561733931240660 | UCAA2000 |
| 25-11-2013 - series 3 | 21.8881596936744000 | pos | 1.773161145423920 | UCAA2000 |
| 25-11-2013 - series 3 | 5.8600618904662400  | pos | 0.657122319396190 | UCAA2000 |
| 25-11-2013 - series 4 | 6.8555214229942900  | pos | 0.742666091458154 | UCAA2000 |
| 25-11-2013 - series 4 | 0.1018669370690740  | neg | 0.046761623219565 | UCAA2000 |
| 25-11-2013 - series 4 | 0.0000000000000000  | neg | 0.015948963317384 | UCAA2000 |
| 25-11-2013 - series 4 | 0.0000000000000000  | neg | 0.010986596352450 | UCAA2000 |
| 25-11-2013 - series 4 | 0.0000000000000000  | neg | 0.014417531718570 | UCAA2000 |
| 25-11-2013 - series 4 | 70.4238977515006000 | pos | 3.714465408805030 | UCAA2000 |
| 25-11-2013 - series 4 | 3.9246588207947800  | pos | 0.480015622965760 | UCAA2000 |
| 25-11-2013 - series 4 | 0.0000000000000000  | neg | 0.003759077317386 | UCAA2000 |
| 25-11-2013 - series 4 | 0.0783592591759513  | neg | 0.042735042735043 | UCAA2000 |
| 25-11-2013 - series 4 | 23.4942998167173000 | pos | 1.863684099979000 | UCAA2000 |
| 25-11-2013 - series 4 | 0.6852658717146210  | pos | 0.129893641095270 | UCAA2000 |
| 25-11-2013 - series 4 | 0.7811576742935460  | pos | 0.142168404529656 | UCAA2000 |
| 25-11-2013 - series 4 | 0.0000000000000000  | neg | 0.015064298836497 | UCAA2000 |
| 25-11-2013 - series 4 | 0.0000000000000000  | neg | 0.023566287439053 | UCAA2000 |
| 25-11-2013 - series 4 | 0.0000000000000000  | neg | 0.005195599022005 | UCAA2000 |
| 25-11-2013 - series 4 | 0.0000000000000000  | neg | 0.014149821640904 | UCAA2000 |
| 25-11-2013 - series 4 | 0.0256487119072755  | neg | 0.032961046036502 | UCAA2000 |
| 25-11-2013 - series 4 | 0.0000000000000000  | neg | 0.024593537764972 | UCAA2000 |
| 25-11-2013 - series 4 | 0.1358406785945910  | neg | 0.052370256531505 | UCAA2000 |
| 25-11-2013 - series 4 | 0.0000000000000000  | neg | 0.009317927692881 | UCAA2000 |
| 25-11-2013 - series 4 | 0.0787663825628500  | neg | 0.042806031178124 | UCAA2000 |
| 25-11-2013 - series 4 | 0.7562686546720710  | pos | 0.139005208865284 | UCAA2000 |
| 25-11-2013 - series 4 | 0.0648512039030491  | neg | 0.040350024307244 | UCAA2000 |
| 25-11-2013 - series 4 | 0.0000000000000000  | neg | 0.022716736207696 | UCAA2000 |
| 25-11-2013 - series 4 | 0.1088334175941790  | neg | 0.047929838874159 | UCAA2000 |
| 25-11-2013 - series 4 | 1.6475164459785500  | pos | 0.245138479670006 | UCAA2000 |
| 25-11-2013 - series 4 | 0.0941880544628451  | neg | 0.045461491442543 | UCAA2000 |
| 25-11-2013 - series 4 | 2.9877992776168200  | pos | 0.387785016286645 | UCAA2000 |
| 25-11-2013 - series 4 | 0.0011262769932977  | neg | 0.027393196202532 | UCAA2000 |
| 25-11-2013 - series 4 | 12.3590525611949000 | pos | 1.167231971685590 | UCAA2000 |
| 25-11-2013 - series 4 | 0.1963129609536600  | neg | 0.061917047033142 | UCAA2000 |
| 25-11-2013 - series 4 | 0.0397567661242063  | neg | 0.035725746069098 | UCAA2000 |
| 25-11-2013 - series 4 | 0.0000000000000000  | neg | 0.025393600812595 | UCAA2000 |
| 25-11-2013 - series 4 | 4.7928711325085100  | pos | 0.561433447098976 | UCAA2000 |

|                       |                     |     |                   |          |
|-----------------------|---------------------|-----|-------------------|----------|
| 25-11-2013 - series 4 | 0.0000000000000000  | neg | 0.019199676637025 | UCAA2000 |
| 25-11-2013 - series 4 | 0.0000000000000000  | neg | 0.019449116904962 | UCAA2000 |
| 25-11-2013 - series 4 | 0.0000000000000000  | neg | 0.007286245353160 | UCAA2000 |
| 26-11-2013 - series 1 | 63.1619294362567000 | pos | 3.497259201252940 | UCAA2000 |
| 26-11-2013 - series 1 | 3.0233147449776600  | pos | 0.391377005347594 | UCAA2000 |
| 26-11-2013 - series 1 | 0.0135942443905120  | neg | 0.030432136335971 | UCAA2000 |
| 26-11-2013 - series 1 | 3.4240200429075000  | pos | 0.431358115568642 | UCAA2000 |
| 26-11-2013 - series 1 | 0.0506974043708999  | neg | 0.037778617302607 | UCAA2000 |
| 26-11-2013 - series 1 | 0.0000000000000000  | neg | 0.024044241404184 | UCAA2000 |
| 26-11-2013 - series 1 | 37.2158662255257000 | pos | 2.539779681762550 | UCAA2000 |
| 26-11-2013 - series 1 | 0.8722727595473260  | pos | 0.153623188405797 | UCAA2000 |

|                       |                    |     |                   |          |
|-----------------------|--------------------|-----|-------------------|----------|
| 26-11-2013 - series 1 | 0.0000000000000000 | neg | 0.023084025854109 | UCAA2000 |
| 26-11-2013 - series 1 | 0.0046608883009928 | neg | 0.028352707683584 | UCAA2000 |

|                       |                      |            |                    |          |
|-----------------------|----------------------|------------|--------------------|----------|
| 26-11-2013 - series 1 | 0.0000000000000000   | neg        | 0.025176233635448  | UCAA2000 |
| 26-11-2013 - series 1 | 0.0000000000000000   | neg        | 0.019146084625694  | UCAA2000 |
| 26-11-2013 - series 1 | 0.0000000000000000   | neg        | 0.021272069772389  | UCAA2000 |
| 26-11-2013 - series 1 | 0.1009467306683260   | neg        | 0.046606529209622  | UCAA2000 |
| 26-11-2013 - series 1 | 0.0628981136839739   | neg        | 0.0400000000000000 | UCAA2000 |
| 26-11-2013 - series 1 | 999.0000000000000000 | pos        | 5.560930232558140  | UCAA2000 |
| 26-11-2013 - series 1 | 0.0000000000000000   | neg        | 0.021593608291946  | UCAA2000 |
| 26-11-2013 - series 1 | 0.0000000000000000   | neg        | 0.014825796886583  | UCAA2000 |
| 26-11-2013 - series 1 | 0.3785400542622790   | indecisive | 0.088653712699514  | UCAA2000 |
| 26-11-2013 - series 1 | 0.0000000000000000   | neg        | 0.017522340984756  | UCAA2000 |
| 26-11-2013 - series 1 | 0.0000000000000000   | neg        | 0.021381227282446  | UCAA2000 |
| 26-11-2013 - series 1 | 0.0000000000000000   | neg        | 0.016969285593077  | UCAA2000 |
| 26-11-2013 - series 1 | 0.6695520972282500   | pos        | 0.127858627858628  | UCAA2000 |
| 26-11-2013 - series 1 | 0.0420276580780938   | neg        | 0.036157390996101  | UCAA2000 |
| 26-11-2013 - series 1 | 0.0000000000000000   | neg        | 0.015460729746444  | UCAA2000 |
| 26-11-2013 - series 1 | 0.0000000000000000   | neg        | 0.017137960582691  | UCAA2000 |
| 26-11-2013 - series 1 | 0.0000000000000000   | neg        | 0.015352407536636  | UCAA2000 |
| 26-11-2013 - series 1 | 0.0000000000000000   | neg        | 0.007409694350108  | UCAA2000 |
| 26-11-2013 - series 1 | 0.0000000000000000   | neg        | 0.011869436201780  | UCAA2000 |
| 26-11-2013 - series 1 | 0.0318779002320556   | neg        | 0.034201408293283  | UCAA2000 |
| 26-11-2013 - series 1 | 0.0000000000000000   | neg        | 0.013439053890606  | UCAA2000 |
| 26-11-2013 - series 1 | 4.1383872982366600   | pos        | 0.500389029371718  | UCAA2000 |
| 26-11-2013 - series 1 | 0.0513624254638341   | neg        | 0.037901386208107  | UCAA2000 |
| 26-11-2013 - series 1 | 0.0000000000000000   | neg        | 0.005717202654416  | UCAA2000 |
| 26-11-2013 - series 1 | 0.0000000000000000   | neg        | 0.012564392511622  | UCAA2000 |
| 26-11-2013 - series 1 | 0.0000000000000000   | neg        | 0.006434519303558  | UCAA2000 |
| 26-11-2013 - series 1 | 0.0000000000000000   | neg        | 0.015053439710974  | UCAA2000 |
| 26-11-2013 - series 2 | 57.2225278325294000  | pos        | 3.305477528089890  | UCAA2000 |
| 26-11-2013 - series 2 | 0.0000000000000000   | neg        | 0.012109469605231  | UCAA2000 |
| 26-11-2013 - series 2 | 74.6236506125373000  | pos        | 3.832333438585410  | UCAA2000 |
| 26-11-2013 - series 2 | 1.1938721053469700   | pos        | 0.192718583075626  | UCAA2000 |
| 26-11-2013 - series 2 | 0.2318826813595730   | indecisive | 0.067338371116709  | UCAA2000 |
| 26-11-2013 - series 2 | 0.0000000000000000   | neg        | 0.020907380305248  | UCAA2000 |
| 26-11-2013 - series 2 | 0.0000000000000000   | neg        | 0.021381227282446  | UCAA2000 |
| 26-11-2013 - series 2 | 0.0752120795461734   | neg        | 0.042184607246760  | UCAA2000 |
| 26-11-2013 - series 2 | 0.0000000000000000   | neg        | 0.013625834582368  | UCAA2000 |
| 26-11-2013 - series 2 | 0.0000000000000000   | neg        | 0.016786973308712  | UCAA2000 |
| 26-11-2013 - series 2 | 0.0079257187743276   | neg        | 0.029146669788131  | UCAA2000 |
| 26-11-2013 - series 2 | 0.0000000000000000   | neg        | 0.011726078799250  | UCAA2000 |
| 26-11-2013 - series 2 | 0.0000000000000000   | neg        | 0.018867924528302  | UCAA2000 |
| 26-11-2013 - series 2 | 0.0257848056263887   | neg        | 0.032988537880906  | UCAA2000 |
| 26-11-2013 - series 2 | 71.3576035789808000  | pos        | 3.741136103698060  | UCAA2000 |
| 26-11-2013 - series 2 | 0.0880474549883253   | neg        | 0.044411646316919  | UCAA2000 |
| 26-11-2013 - series 2 | 0.0000000000000000   | neg        | 0.014771048744461  | UCAA2000 |
| 26-11-2013 - series 2 | 0.0176888109524501   | neg        | 0.031315240083507  | UCAA2000 |

|                       |                      |            |                   |          |
|-----------------------|----------------------|------------|-------------------|----------|
| 26-11-2013 - series 2 | 0.0000000000000000   | neg        | 0.019704433497537 | UCAA2000 |
| 26-11-2013 - series 2 | 0.0000000000000000   | neg        | 0.015432098765432 | UCAA2000 |
| 26-11-2013 - series 2 | 0.0372619261120704   | neg        | 0.035247771096828 | UCAA2000 |
| 26-11-2013 - series 2 | 5.0780008051715000   | pos        | 0.587440758293839 | UCAA2000 |
| 26-11-2013 - series 2 | 0.0000000000000000   | neg        | 0.004363526933494 | UCAA2000 |
| 26-11-2013 - series 2 | 0.8564979132780510   | pos        | 0.151653504442251 | UCAA2000 |
| 26-11-2013 - series 2 | 0.0000000000000000   | neg        | 0.012809017548354 | UCAA2000 |
| 26-11-2013 - series 2 | 0.0000000000000000   | neg        | 0.011457378551787 | UCAA2000 |
| 26-11-2013 - series 2 | 0.0000000000000000   | neg        | 0.020694752402070 | UCAA2000 |
| 26-11-2013 - series 2 | 0.0000000000000000   | neg        | 0.024215420379698 | UCAA2000 |
| 26-11-2013 - series 2 | 0.0017530501903621   | neg        | 0.027577791336181 | UCAA2000 |
| 26-11-2013 - series 2 | 0.1452711477130610   | neg        | 0.053891716025695 | UCAA2000 |
| 26-11-2013 - series 2 | 72.9432411470464000  | pos        | 3.785812356979410 | UCAA2000 |
| 26-11-2013 - series 2 | 0.1437345584825110   | neg        | 0.053644740443390 | UCAA2000 |
| 26-11-2013 - series 2 | 1.8496897902568700   | pos        | 0.267691737680622 | UCAA2000 |
| 26-11-2013 - series 2 | 2.4296002336327500   | pos        | 0.330181637223190 | UCAA2000 |
| 26-11-2013 - series 2 | 0.0000000000000000   | neg        | 0.002120740845469 | UCAA2000 |
| 26-11-2013 - series 2 | 0.0652099342663129   | neg        | 0.040414161656647 | UCAA2000 |
| 26-11-2013 - series 2 | 0.0000000000000000   | neg        | 0.015042117930205 | UCAA2000 |
| 26-11-2013 - series 3 | 0.3929427670693520   | indecisive | 0.090676586840270 | UCAA2000 |
| 26-11-2013 - series 3 | 0.1369757234501040   | neg        | 0.052554112554113 | UCAA2000 |
| 26-11-2013 - series 3 | 0.0506094300051066   | neg        | 0.037762360586634 | UCAA2000 |
| 26-11-2013 - series 3 | 0.0000000000000000   | neg        | 0.011475122634898 | UCAA2000 |
| 26-11-2013 - series 3 | 1.2408972398547000   | pos        | 0.198285846652768 | UCAA2000 |
| 26-11-2013 - series 3 | 999.0000000000000000 | pos        | 4.767746156362450 | UCAA2000 |
| 26-11-2013 - series 3 | 0.0563845490225786   | neg        | 0.038821954484605 | UCAA2000 |
| 26-11-2013 - series 3 | 1.1027252530335000   | pos        | 0.181826941607246 | UCAA2000 |
| 26-11-2013 - series 3 | 0.0000000000000000   | neg        | 0.010027073097363 | UCAA2000 |
| 26-11-2013 - series 3 | 999.0000000000000000 | pos        | 4.607517965726920 | UCAA2000 |
| 26-11-2013 - series 3 | 0.0744143553676604   | neg        | 0.042044605698431 | UCAA2000 |
| 26-11-2013 - series 3 | 0.5517583348450580   | pos        | 0.112365664535437 | UCAA2000 |
| 26-11-2013 - series 3 | 54.5604844995372000  | pos        | 3.214924452667280 | UCAA2000 |
| 26-11-2013 - series 3 | 0.6034488269629320   | pos        | 0.119218439932835 | UCAA2000 |
| 26-11-2013 - series 3 | 0.0632423291723365   | neg        | 0.040061791967044 | UCAA2000 |
| 26-11-2013 - series 3 | 0.0000000000000000   | neg        | 0.012565971349585 | UCAA2000 |
| 26-11-2013 - series 3 | 0.0000000000000000   | neg        | 0.012121212121212 | UCAA2000 |
| 26-11-2013 - series 3 | 0.0000000000000000   | neg        | 0.011014428901861 | UCAA2000 |
| 26-11-2013 - series 3 | 0.0000000000000000   | neg        | 0.017040692801937 | UCAA2000 |
| 26-11-2013 - series 3 | 0.0103713724570439   | neg        | 0.029712404712405 | UCAA2000 |
| 26-11-2013 - series 3 | 22.1115780908585000  | pos        | 1.785924328563030 | UCAA2000 |
| 26-11-2013 - series 3 | 15.5630450788043000  | pos        | 1.385937768609250 | UCAA2000 |
| 26-11-2013 - series 3 | 0.0000000000000000   | neg        | 0.017912586577502 | UCAA2000 |
| 26-11-2013 - series 3 | 0.0000000000000000   | neg        | 0.009664637092877 | UCAA2000 |
| 26-11-2013 - series 3 | 0.0000000000000000   | neg        | 0.008831581736289 | UCAA2000 |
| 26-11-2013 - series 3 | 0.0000000000000000   | neg        | 0.017789909638554 | UCAA2000 |

|                       |                    |     |                   |          |
|-----------------------|--------------------|-----|-------------------|----------|
| 26-11-2013 - series 3 | 0.1853630441751220 | neg | 0.060222025739267 | UCAA2000 |
| 26-11-2013 - series 3 | 0.0000000000000000 | neg | 0.009384384384384 | UCAA2000 |
| 26-11-2013 - series 3 | 0.0000000000000000 | neg | 0.009484066767830 | UCAA2000 |
| 26-11-2013 - series 3 | 0.1573890824064650 | neg | 0.055827424348347 | UCAA2000 |
| 26-11-2013 - series 3 | 0.0000000000000000 | neg | 0.013711235851661 | UCAA2000 |
| 26-11-2013 - series 3 | 0.0835773549279847 | neg | 0.043641287365899 | UCAA2000 |
| 26-11-2013 - series 3 | 0.0000000000000000 | neg | 0.023614663256607 | UCAA2000 |
| 26-11-2013 - series 3 | 0.0143386425213120 | neg | 0.030595013410152 | UCAA2000 |
|                       |                    |     |                   |          |
| 26-11-2013 - series 3 | 0.0255642169665845 | neg | 0.032943967877350 | UCAA2000 |
|                       |                    |     |                   |          |
| 26-11-2013 - series 3 | 0.0000000000000000 | neg | 0.023545587350692 | UCAA2000 |
| 26-11-2013 - series 3 | 0.0327931090353937 | neg | 0.034380816818132 | UCAA2000 |
|                       |                    |     |                   |          |
| 26-11-2013 - series 4 | 0.0000000000000000 | neg | 0.023427644620652 | UCAA2000 |
| 26-11-2013 - series 4 | 0.0379522059598748 | neg | 0.035380428351674 | UCAA2000 |
| 26-11-2013 - series 4 | 0.0030975578580975 | neg | 0.027948070681572 | UCAA2000 |
| 26-11-2013 - series 4 | 0.0156605511206327 | neg | 0.030881576632061 | UCAA2000 |
| 26-11-2013 - series 4 | 0.0738712948440309 | neg | 0.041949184114448 | UCAA2000 |

|                       |                    |            |                   |          |
|-----------------------|--------------------|------------|-------------------|----------|
| 26-11-2013 - series 4 | 0.0918932192886236 | neg        | 0.045070247420117 | UCAA2000 |
| 26-11-2013 - series 4 | 0.0000000000000000 | neg        | 0.011334013374136 | UCAA2000 |
| 26-11-2013 - series 4 | 0.0000000000000000 | neg        | 0.011562030292519 | UCAA2000 |
| 26-11-2013 - series 4 | 0.0000000000000000 | neg        | 0.024488619994238 | UCAA2000 |
| 26-11-2013 - series 4 | 0.0607435128992037 | neg        | 0.039612188365651 | UCAA2000 |
| 26-11-2013 - series 4 | 0.2395908226047970 | indecisive | 0.068497629556972 | UCAA2000 |
| 26-11-2013 - series 4 | 0.0217579208244997 | neg        | 0.032166508987701 | UCAA2000 |
| 26-11-2013 - series 4 | 0.1633693979908370 | neg        | 0.056775225356208 | UCAA2000 |
| 26-11-2013 - series 4 | 0.0976562308269472 | neg        | 0.046050381853414 | UCAA2000 |
| 26-11-2013 - series 4 | 5.1935884851182400 | pos        | 0.597888675623800 | UCAA2000 |
| 26-11-2013 - series 4 | 0.0000000000000000 | neg        | 0.022653721682848 | UCAA2000 |
| 26-11-2013 - series 4 | 0.0000000000000000 | neg        | 0.015909674108288 | UCAA2000 |
| 26-11-2013 - series 4 | 0.0000000000000000 | neg        | 0.022309027777778 | UCAA2000 |
| 26-11-2013 - series 4 | 0.0000000000000000 | neg        | 0.018230088495575 | UCAA2000 |
| 26-11-2013 - series 4 | 0.2029242811215390 | indecisive | 0.062934205149162 | UCAA2000 |
| 26-11-2013 - series 4 | 0.0000000000000000 | neg        | 0.010765295246216 | UCAA2000 |
| 26-11-2013 - series 4 | 0.0000000000000000 | neg        | 0.013478905512872 | UCAA2000 |
| 26-11-2013 - series 4 | 0.0000000000000000 | neg        | 0.014797277300977 | UCAA2000 |
| 26-11-2013 - series 4 | 0.0485253814657224 | neg        | 0.037376144487646 | UCAA2000 |
| 26-11-2013 - series 4 | 0.0423747860115526 | neg        | 0.036223097908457 | UCAA2000 |
| 26-11-2013 - series 4 | 0.0000000000000000 | neg        | 0.015915963711603 | UCAA2000 |
| 26-11-2013 - series 4 | 0.0000000000000000 | neg        | 0.012467273407306 | UCAA2000 |
| 26-11-2013 - series 4 | 0.2109889745437240 | indecisive | 0.064168880190130 | UCAA2000 |
| 26-11-2013 - series 4 | 0.1607024975167190 | neg        | 0.056353146384006 | UCAA2000 |
| 26-11-2013 - series 4 | 0.0117049119219482 | neg        | 0.030013312356287 | UCAA2000 |
| 26-11-2013 - series 4 | 0.0071970992778428 | neg        | 0.028973950026582 | UCAA2000 |
| 26-11-2013 - series 4 | 0.0000000000000000 | neg        | 0.015551151090105 | UCAA2000 |
| 26-11-2013 - series 4 | 0.0000000000000000 | neg        | 0.003208777559259 | UCAA2000 |
| 26-11-2013 - series 4 | 0.0498968018085831 | neg        | 0.037630536550234 | UCAA2000 |
| 26-11-2013 - series 4 | 0.2643987830163530 | indecisive | 0.072194777699365 | UCAA2000 |
| 26-11-2013 - series 4 | 0.1722858078658120 | neg        | 0.058179723502304 | UCAA2000 |

|                       |                    |            |                   |          |
|-----------------------|--------------------|------------|-------------------|----------|
| 26-11-2013 - series 4 | 0.0301775237725649 | neg        | 0.033866267622273 | UCAA2000 |
| 27-11-2013 - series 1 | 0.2100093730032100 | indecisive | 0.051359084406295 | UCAA2000 |
| 27-11-2013 - series 1 | 0.0000000000000000 | neg        | 0.014160294534126 | UCAA2000 |
| 27-11-2013 - series 1 | 0.0000000000000000 | neg        | 0.002276751834050 | UCAA2000 |
| 27-11-2013 - series 1 | 0.0000000000000000 | neg        | 0.020810363836825 | UCAA2000 |
| 27-11-2013 - series 1 | 0.3421208304822320 | indecisive | 0.062612098483613 | UCAA2000 |
| 27-11-2013 - series 1 | 0.2326529361259060 | indecisive | 0.053357531760436 | UCAA2000 |
| 27-11-2013 - series 1 | 0.0000000000000000 | neg        | 0.013479957431713 | UCAA2000 |
| 27-11-2013 - series 1 | 0.0000000000000000 | neg        | 0.012663036596176 | UCAA2000 |
| 27-11-2013 - series 1 | 0.0000000000000000 | neg        | 0.011340440009072 | UCAA2000 |
| 27-11-2013 - series 1 | 0.0000000000000000 | neg        | 0.010682288077188 | UCAA2000 |
| 27-11-2013 - series 1 | 0.1570135210594060 | neg        | 0.046530093695411 | UCAA2000 |
| 27-11-2013 - series 1 | 0.6541511193326760 | pos        | 0.086654667009514 | UCAA2000 |
| 27-11-2013 - series 1 | 0.0000000000000000 | neg        | 0.014887598630341 | UCAA2000 |
| 27-11-2013 - series 1 | 0.0325406458348336 | neg        | 0.033685541407026 | UCAA2000 |
| 27-11-2013 - series 1 | 0.0000000000000000 | neg        | 0.014524328249818 | UCAA2000 |
| 27-11-2013 - series 1 | 0.4298105248549690 | pos        | 0.069655338635816 | UCAA2000 |
| 27-11-2013 - series 1 | 0.0303252754572492 | neg        | 0.033416328135238 | UCAA2000 |
| 27-11-2013 - series 1 | 0.1349448835330950 | neg        | 0.044442283380337 | UCAA2000 |
| 27-11-2013 - series 1 | 0.0000000000000000 | neg        | 0.025198210220583 | UCAA2000 |
| 27-11-2013 - series 1 | 0.3636303560043940 | indecisive | 0.064365927143248 | UCAA2000 |
| 27-11-2013 - series 1 | 0.0000000000000000 | neg        | 0.012100677637948 | UCAA2000 |
| 27-11-2013 - series 1 | 0.0000000000000000 | neg        | 0.018843037497645 | UCAA2000 |
| 27-11-2013 - series 1 | 0.0000000000000000 | neg        | 0.013685507048036 | UCAA2000 |



|                       |                      |            |                   |          |
|-----------------------|----------------------|------------|-------------------|----------|
| 22-11-2013 - series 1 | 0.1059715050453800   | neg        | 0.034059493530908 | UCAA2000 |
| 22-11-2013 - series 1 | 0.0020952991149130   | neg        | 0.013845239106430 | UCAA2000 |
| 22-11-2013 - series 1 | 0.1167744138421620   | neg        | 0.035800900796859 | UCAA2000 |
| 22-11-2013 - series 1 | 0.0215572484649267   | neg        | 0.018713737027049 | UCAA2000 |
| 22-11-2013 - series 1 | 0.0697908143571819   | neg        | 0.027960234333393 | UCAA2000 |
| 22-11-2013 - series 1 | 0.2901839503494890   | indecisive | 0.060991435245263 | UCAA2000 |
| 22-11-2013 - series 1 | 0.0696857479583640   | neg        | 0.027941787941788 | UCAA2000 |
| 22-11-2013 - series 1 | 0.0000000000000000   | neg        | 0.010682143157541 | UCAA2000 |
| 22-11-2013 - series 1 | 16.5971252895444000  | pos        | 1.205394190871370 | UCAA2000 |
| 22-11-2013 - series 1 | 0.1764379561538200   | neg        | 0.044958419958420 | UCAA2000 |
| 22-11-2013 - series 1 | 0.1205730099454480   | neg        | 0.036406099738975 | UCAA2000 |
| 22-11-2013 - series 1 | 10.6573523567599000  | pos        | 0.869284561592254 | UCAA2000 |
| 22-11-2013 - series 1 | 0.5778692483877150   | pos        | 0.097158218125960 | UCAA2000 |
| 22-11-2013 - series 1 | 0.0017155534588908   | neg        | 0.013717421124829 | UCAA2000 |
| 22-11-2013 - series 1 | 0.1153756333547640   | neg        | 0.035577140275582 | UCAA2000 |
| 22-11-2013 - series 1 | 1.9645083797833200   | pos        | 0.239674315321984 | UCAA2000 |
| 22-11-2013 - series 1 | 0.0000000000000000   | neg        | 0.010841283607979 | UCAA2000 |
| 22-11-2013 - series 1 | 0.0718397347947843   | neg        | 0.028318960928351 | UCAA2000 |
| 22-11-2013 - series 1 | 0.0312568532555524   | neg        | 0.020747327193818 | UCAA2000 |
| 22-11-2013 - series 1 | 0.0000000000000000   | neg        | 0.007406101216717 | UCAA2000 |
| 22-11-2013 - series 1 | 0.1558253417431060   | neg        | 0.041870886430472 | UCAA2000 |
| 22-11-2013 - series 1 | 0.0109797950870999   | neg        | 0.016286644951140 | UCAA2000 |
| 22-11-2013 - series 1 | 0.0000000000000000   | neg        | 0.002674446875760 | UCAA2000 |
| 22-11-2013 - series 2 | 0.0591472774798046   | neg        | 0.026064178127047 | UCAA2000 |
| 22-11-2013 - series 2 | 9.0982048035108600   | pos        | 0.772006275056650 | UCAA2000 |
| 22-11-2013 - series 2 | 0.1976029493455630   | neg        | 0.048060075093867 | UCAA2000 |
| 22-11-2013 - series 2 | 0.1503276599613630   | neg        | 0.041034993730765 | UCAA2000 |
| 22-11-2013 - series 2 | 0.0572541307442990   | neg        | 0.025720675944334 | UCAA2000 |
| 22-11-2013 - series 2 | 0.0146303496210898   | neg        | 0.017158544955388 | UCAA2000 |
| 22-11-2013 - series 2 | 0.0000000000000000   | neg        | 0.005781799899447 | UCAA2000 |
| 22-11-2013 - series 2 | 0.7420099510804490   | pos        | 0.116135662898253 | UCAA2000 |
| 22-11-2013 - series 2 | 0.0000000000000000   | neg        | 0.005115612850419 | UCAA2000 |
| 22-11-2013 - series 2 | 0.7791344345724790   | pos        | 0.120308917581755 | UCAA2000 |
| 22-11-2013 - series 2 | 0.1234088982644320   | neg        | 0.036855638545366 | UCAA2000 |
| 22-11-2013 - series 2 | 0.1593446814358120   | neg        | 0.042403127124405 | UCAA2000 |
| 22-11-2013 - series 2 | 0.0036240935377120   | neg        | 0.014324595330182 | UCAA2000 |
| 22-11-2013 - series 2 | 999.0000000000000000 | pos        | 4.690084985835690 | UCAA2000 |

|                       |                      |            |                   |          |
|-----------------------|----------------------|------------|-------------------|----------|
| 22-11-2013 - series 2 | 0.0000000000000000   | neg        | 0.006028131279303 | UCAA2000 |
| 22-11-2013 - series 2 | 0.1139386867520290   | neg        | 0.035346756152125 | UCAA2000 |
| 22-11-2013 - series 2 | 0.1271200736866040   | neg        | 0.037441077441077 | UCAA2000 |
| 22-11-2013 - series 2 | 0.2584640168618780   | indecisive | 0.056662034892697 | UCAA2000 |
| 22-11-2013 - series 2 | 0.1149884522056720   | neg        | 0.035515115937775 | UCAA2000 |
| 22-11-2013 - series 2 | 0.0001346046015888   | neg        | 0.013089005235602 | UCAA2000 |
| 22-11-2013 - series 2 | 0.6998028439209040   | pos        | 0.111341273951321 | UCAA2000 |
| 22-11-2013 - series 2 | 0.6127973773014530   | pos        | 0.101275318829707 | UCAA2000 |
| 22-11-2013 - series 2 | 0.0369677153962123   | neg        | 0.021889311495770 | UCAA2000 |
| 22-11-2013 - series 2 | 0.0000000000000000   | neg        | 0.010889687465970 | UCAA2000 |
| 22-11-2013 - series 2 | 0.0000000000000000   | neg        | 0.011246063877643 | UCAA2000 |
| 22-11-2013 - series 2 | 0.1469426894157490   | neg        | 0.040517534899557 | UCAA2000 |
| 22-11-2013 - series 2 | 0.0000000000000000   | neg        | 0.011768859597505 | UCAA2000 |
| 22-11-2013 - series 2 | 0.0030629831249683   | neg        | 0.014153944020356 | UCAA2000 |
| 22-11-2013 - series 2 | 0.4403979985867160   | pos        | 0.080450522928399 | UCAA2000 |
| 22-11-2013 - series 2 | 0.4224219208485500   | pos        | 0.078197345405906 | UCAA2000 |
| 22-11-2013 - series 2 | 0.0000000000000000   | neg        | 0.011229646266143 | UCAA2000 |
| 22-11-2013 - series 2 | 40.7288476939673000  | pos        | 2.249911504424780 | UCAA2000 |
| 22-11-2013 - series 2 | 0.0000000000000000   | neg        | 0.001923539312335 | UCAA2000 |
| 22-11-2013 - series 2 | 0.0000000000000000   | neg        | 0.011144544745347 | UCAA2000 |
| 22-11-2013 - series 2 | 0.0707651791532020   | neg        | 0.028131062729036 | UCAA2000 |
| 22-11-2013 - series 2 | 51.0197665758323000  | pos        | 2.601487778958550 | UCAA2000 |
| 22-11-2013 - series 2 | 0.2519182608659560   | indecisive | 0.055756600991824 | UCAA2000 |
| 22-11-2013 - series 3 | 0.2763007443698140   | indecisive | 0.059108006448146 | UCAA2000 |
| 22-11-2013 - series 3 | 0.1455630682084760   | neg        | 0.040306005937429 | UCAA2000 |
| 22-11-2013 - series 3 | 0.0794261764385878   | neg        | 0.029631474103586 | UCAA2000 |
| 22-11-2013 - series 3 | 0.6314227827452900   | pos        | 0.103452191687486 | UCAA2000 |
| 22-11-2013 - series 3 | 999.0000000000000000 | pos        | 3.978841484564690 | UCAA2000 |
| 22-11-2013 - series 3 | 0.0000000000000000   | neg        | 0.011325864828265 | UCAA2000 |
| 22-11-2013 - series 3 | 0.2438723115146340   | indecisive | 0.054637626736763 | UCAA2000 |
| 22-11-2013 - series 3 | 0.0978611893028821   | neg        | 0.032730758696248 | UCAA2000 |
| 22-11-2013 - series 3 | 0.0151616351739893   | neg        | 0.017281930667757 | UCAA2000 |
| 22-11-2013 - series 3 | 0.0013792427315351   | neg        | 0.013599891200870 | UCAA2000 |
| 22-11-2013 - series 3 | 0.6356868308177410   | pos        | 0.103948805993445 | UCAA2000 |
| 22-11-2013 - series 3 | 0.0337240232207622   | neg        | 0.021244954323348 | UCAA2000 |
| 22-11-2013 - series 3 | 0.2220498170208640   | indecisive | 0.051567239635996 | UCAA2000 |
| 22-11-2013 - series 3 | 0.0468557623773548   | neg        | 0.023794614902943 | UCAA2000 |
| 22-11-2013 - series 3 | 0.0088262330213164   | neg        | 0.015748031496063 | UCAA2000 |
| 22-11-2013 - series 3 | 0.2191723374776900   | indecisive | 0.051158301158301 | UCAA2000 |
| 22-11-2013 - series 3 | 0.1548892589322320   | neg        | 0.041728948679621 | UCAA2000 |
| 22-11-2013 - series 3 | 0.0061945665992284   | neg        | 0.015055706112617 | UCAA2000 |
| 22-11-2013 - series 3 | 0.1394987763827710   | neg        | 0.039371772805508 | UCAA2000 |
| 22-11-2013 - series 3 | 0.0070417736927095   | neg        | 0.015283509093688 | UCAA2000 |
| 22-11-2013 - series 3 | 0.0551161956190788   | neg        | 0.025330262998424 | UCAA2000 |
| 22-11-2013 - series 3 | 11.5434164972869000  | pos        | 0.922649818112196 | UCAA2000 |
| 22-11-2013 - series 3 | 0.0126858854048030   | neg        | 0.016699754758846 | UCAA2000 |

|                       |                    |            |                   |          |
|-----------------------|--------------------|------------|-------------------|----------|
| 22-11-2013 - series 3 | 3.0356055013033600 | pos        | 0.334155900711279 | UCAA2000 |
| 22-11-2013 - series 3 | 0.8453673829320020 | pos        | 0.127659574468085 | UCAA2000 |
| 22-11-2013 - series 3 | 0.3906611724366790 | indecisive | 0.074171212757029 | UCAA2000 |
| 22-11-2013 - series 3 | 0.2847167736443430 | indecisive | 0.060251798561151 | UCAA2000 |
| 22-11-2013 - series 3 | 2.0094600292285200 | pos        | 0.243833464257659 | UCAA2000 |
| 22-11-2013 - series 3 | 0.1734714894384900 | neg        | 0.044518357426123 | UCAA2000 |
| 22-11-2013 - series 3 | 0.0871437637202325 | neg        | 0.030943396226415 | UCAA2000 |
| 22-11-2013 - series 3 | 0.0000000000000000 | neg        | 0.002376237623762 | UCAA2000 |

|                       |                    |     |                   |          |
|-----------------------|--------------------|-----|-------------------|----------|
| 21-11-2013 - series 2 | 0.0000000000000000 | neg | 0.007577092511013 | UCAA2000 |
| 21-11-2013 - series 3 | 0.0422995482407119 | neg | 0.047197370823444 | UCAA2000 |
| 21-11-2013 - series 3 | 0.0000000000000000 | neg | 0.020139707883516 | UCAA2000 |
| 21-11-2013 - series 3 | 0.0225222049993976 | neg | 0.041069459757442 | UCAA2000 |
| 21-11-2013 - series 3 | 0.0000000000000000 | neg | 0.027087430716968 | UCAA2000 |
| 21-11-2013 - series 3 | 0.0359397237806928 | neg | 0.045299253448058 | UCAA2000 |

|                       |                    |     |                   |          |
|-----------------------|--------------------|-----|-------------------|----------|
| 21-11-2013 - series 3 | 0.0000000000000000 | neg | 0.005920913512370 | UCAA2000 |
| 21-11-2013 - series 3 | 0.0618326154905655 | neg | 0.052736232385234 | UCAA2000 |
| 21-11-2013 - series 3 | 0.0000000000000000 | neg | 0.010995052226498 | UCAA2000 |
| 21-11-2013 - series 3 | 0.0000000000000000 | neg | 0.010900832702498 | UCAA2000 |
| 21-11-2013 - series 3 | 0.0494533151233646 | neg | 0.049271215237414 | UCAA2000 |

|                       |                    |     |                   |          |
|-----------------------|--------------------|-----|-------------------|----------|
| 21-11-2013 - series 3 | 0.0000000000000000 | neg | 0.020535216502509 | UCAA2000 |
| 21-11-2013 - series 3 | 0.0000000000000000 | neg | 0.025783895990386 | UCAA2000 |
| 21-11-2013 - series 3 | 0.0000000000000000 | neg | 0.010464629552114 | UCAA2000 |
| 21-11-2013 - series 3 | 0.0073510013485671 | neg | 0.035623114411697 | UCAA2000 |
| 21-11-2013 - series 3 | 0.0000000000000000 | neg | 0.031452548270451 | UCAA2000 |
| 21-11-2013 - series 3 | 0.1469450632798280 | neg | 0.074079026542756 | UCAA2000 |
| 21-11-2013 - series 3 | 0.0021287167057308 | neg | 0.033311702357776 | UCAA2000 |
| 21-11-2013 - series 3 | 0.0000000000000000 | neg | 0.018748197288722 | UCAA2000 |
| 21-11-2013 - series 3 | 0.0000000000000000 | neg | 0.030013226167464 | UCAA2000 |
| 21-11-2013 - series 3 | 0.0000000000000000 | neg | 0.024876181900045 | UCAA2000 |
| 21-11-2013 - series 3 | 0.0000000000000000 | neg | 0.012420817289778 | UCAA2000 |
| 21-11-2013 - series 3 | 0.0000000000000000 | neg | 0.008631106507854 | UCAA2000 |
| 21-11-2013 - series 3 | 0.0000000000000000 | neg | 0.027865673165255 | UCAA2000 |
| 21-11-2013 - series 3 | 0.0000000000000000 | neg | 0.024863553668890 | UCAA2000 |
| 21-11-2013 - series 3 | 0.0000000000000000 | neg | 0.020295020295020 | UCAA2000 |
| 21-11-2013 - series 3 | 0.0000000000000000 | neg | 0.001644601595264 | UCAA2000 |
| 21-11-2013 - series 3 | 0.0000000000000000 | neg | 0.012727504136439 | UCAA2000 |
| 21-11-2013 - series 3 | 0.0271259336684349 | neg | 0.042562113429081 | UCAA2000 |
| 21-11-2013 - series 3 | 0.0000000000000000 | neg | 0.027631044290939 | UCAA2000 |
| 21-11-2013 - series 3 | 0.0000000000000000 | neg | 0.029203653672971 | UCAA2000 |
| 21-11-2013 - series 3 | 0.0000000000000000 | neg | 0.014452955629426 | UCAA2000 |
| 21-11-2013 - series 3 | 0.0000000000000000 | neg | 0.018733273862623 | UCAA2000 |
| 21-11-2013 - series 3 | 0.0000000000000000 | neg | 0.012023566189732 | UCAA2000 |
| 21-11-2013 - series 3 | 0.0000000000000000 | neg | 0.012436264146251 | UCAA2000 |
| 21-11-2013 - series 3 | 0.0291704778688397 | neg | 0.043209876543210 | UCAA2000 |
| 21-11-2013 - series 3 | 0.0032468020050396 | neg | 0.033854166666667 | UCAA2000 |
| 21-11-2013 - series 3 | 0.0000000000000000 | neg | 0.024544179523142 | UCAA2000 |
| 21-11-2013 - series 4 | 9.0470400042392200 | pos | 1.134246575342470 | UCAA2000 |
| 21-11-2013 - series 4 | 0.0988622752184635 | neg | 0.062439160061188 | UCAA2000 |
| 21-11-2013 - series 4 | 0.0000000000000000 | neg | 0.029488291413703 | UCAA2000 |
| 21-11-2013 - series 4 | 0.0000000000000000 | neg | 0.016228594185583 | UCAA2000 |
| 21-11-2013 - series 4 | 0.0168276174810632 | neg | 0.039142710472279 | UCAA2000 |
| 21-11-2013 - series 4 | 0.0000000000000000 | neg | 0.010172939979654 | UCAA2000 |
| 21-11-2013 - series 4 | 0.0000000000000000 | neg | 0.026204637531247 | UCAA2000 |
| 21-11-2013 - series 4 | 0.9059610264904660 | pos | 0.216314731020613 | UCAA2000 |
| 21-11-2013 - series 4 | 0.0460251976284794 | neg | 0.048284789644013 | UCAA2000 |
| 21-11-2013 - series 4 | 0.0041707411214997 | neg | 0.034276729559748 | UCAA2000 |
| 21-11-2013 - series 4 | 0.0000000000000000 | neg | 0.012187690432663 | UCAA2000 |
| 21-11-2013 - series 4 | 0.0000000000000000 | neg | 0.012072920439454 | UCAA2000 |
| 21-11-2013 - series 4 | 0.0000000000000000 | neg | 0.014551083591331 | UCAA2000 |
| 21-11-2013 - series 4 | 0.0000000000000000 | neg | 0.009722222222222 | UCAA2000 |
| 21-11-2013 - series 4 | 0.0000000000000000 | neg | 0.013005063039809 | UCAA2000 |
| 21-11-2013 - series 4 | 0.0000000000000000 | neg | 0.010399838449112 | UCAA2000 |

|                       |                     |            |                    |          |
|-----------------------|---------------------|------------|--------------------|----------|
| 21-11-2013 - series 4 | 0.0000000000000000  | neg        | 0.012152144853567  | UCAA2000 |
| 21-11-2013 - series 4 | 0.0000000000000000  | neg        | 0.014074870491643  | UCAA2000 |
| 21-11-2013 - series 4 | 0.6862027680812870  | pos        | 0.179319546364243  | UCAA2000 |
| 21-11-2013 - series 4 | 45.3305291849048000 | pos        | 3.200955305356530  | UCAA2000 |
| 21-11-2013 - series 4 | 0.0000000000000000  | neg        | 0.011709601873536  | UCAA2000 |
|                       |                     |            |                    |          |
| 21-11-2013 - series 4 | 0.1030934111458340  | neg        | 0.0635000000000000 | UCAA2000 |
| 21-11-2013 - series 4 | 0.0000000000000000  | neg        | 0.015951143924893  | UCAA2000 |
| 21-11-2013 - series 4 | 0.0010073982049449  | neg        | 0.032710280373832  | UCAA2000 |
| 21-11-2013 - series 4 | 0.0000000000000000  | neg        | 0.017203628401627  | UCAA2000 |
| 21-11-2013 - series 4 | 0.0000000000000000  | neg        | 0.009179364787957  | UCAA2000 |
| 21-11-2013 - series 4 | 0.0000000000000000  | neg        | 0.009963136395337  | UCAA2000 |
| 21-11-2013 - series 4 | 0.0000000000000000  | neg        | 0.031959878060773  | UCAA2000 |
| 21-11-2013 - series 4 | 0.0000000000000000  | neg        | 0.011064394777606  | UCAA2000 |
| 21-11-2013 - series 4 | 0.0000000000000000  | neg        | 0.024220952931820  | UCAA2000 |
| 21-11-2013 - series 4 | 0.0000000000000000  | neg        | 0.026853339453753  | UCAA2000 |
| 21-11-2013 - series 4 | 0.0000000000000000  | neg        | 0.018608183803285  | UCAA2000 |
|                       |                     |            |                    |          |
| 21-11-2013 - series 4 | 0.0000000000000000  | neg        | 0.003209739900387  | UCAA2000 |
| 21-11-2013 - series 4 | 0.0703156424428663  | neg        | 0.055036344755971  | UCAA2000 |
| 21-11-2013 - series 4 | 0.0000000000000000  | neg        | 0.023753638156042  | UCAA2000 |
| 21-11-2013 - series 4 | 0.0000000000000000  | neg        | 0.021822149481724  | UCAA2000 |
| 21-11-2013 - series 4 | 0.0000000000000000  | neg        | 0.005307855626327  | UCAA2000 |
| 22-11-2013 - series 1 | 0.1970244783542870  | neg        | 0.047976147452114  | UCAA2000 |
| 22-11-2013 - series 1 | 0.1420613476861920  | neg        | 0.039767441860465  | UCAA2000 |
| 22-11-2013 - series 1 | 2.2749009142239900  | pos        | 0.268005354752343  | UCAA2000 |
| 22-11-2013 - series 1 | 0.1805597767782060  | neg        | 0.045567616463139  | UCAA2000 |
| 22-11-2013 - series 1 | 0.0533193205506260  | neg        | 0.0250000000000000 | UCAA2000 |
| 22-11-2013 - series 1 | 0.0200207861618639  | neg        | 0.018377754257673  | UCAA2000 |
| 22-11-2013 - series 1 | 0.0703474002246319  | neg        | 0.028057869355546  | UCAA2000 |
| 22-11-2013 - series 1 | 0.2154740559858010  | indecisive | 0.050631246712257  | UCAA2000 |
| 22-11-2013 - series 1 | 0.0430139546023408  | neg        | 0.023063958130045  | UCAA2000 |
| 22-11-2013 - series 1 | 0.2662084089927290  | indecisive | 0.057727775728514  | UCAA2000 |
| 22-11-2013 - series 1 | 2.7193117178742200  | pos        | 0.307157510827445  | UCAA2000 |
| 22-11-2013 - series 1 | 0.0629089680100265  | neg        | 0.026740871453780  | UCAA2000 |
| 22-11-2013 - series 1 | 0.0986477297632351  | neg        | 0.032860477644101  | UCAA2000 |
| 22-11-2013 - series 1 | 0.0000000000000000  | neg        | 0.011107408641564  | UCAA2000 |
